# Supplementary material for: Exploring the Mechanism of Gyejibokryeong-hwan against Atherosclerosis Using Network Pharmacology and Molecular Docking
Source: Plants (Basel). 2020 Dec 10;9(12):1750. doi: 10.3390/plants9121750 (PMC7764045; doi:10.3390/plants9121750)
Supplement: Supplementary file 1 [file plants-09-01750-s001.xlsx]

## Sheet: Suppl_Table 1
Table S1. ADME Information of components in herbal medicines in GBH
No.	Source	Herb	MolID	Molecular name	Chemspider ID	MW	AlogP	Hdon	Hacc	OB(%)	Caco-2	BBB	DL	FASA-	HL
1	TCMSP	Cinnamomi Ramulus	MOL000105	Protocatechuic acid	71	154.13	0.9	3	4	25.37	0.1	-0.17	0.04	0.43
2	TCMSP	Cinnamomi Ramulus	MOL000103	4-Hydroxybenzoic acid	132	138.13	1.17	2	3	30.15	0.39	0.21	0.03	0.45	11.77
	TCMSP	Moutan Radicis Cortex	MOL000103	4-Hydroxybenzoic acid	132	138.13	1.17	2	3	30.15	0.39	0.21	0.03	0.45	11.77
3	TCMSP	Cinnamomi Ramulus	MOL004480	Acetic acid	171	60.06	-0.23	1	2	47.87	0.42	0.72	0	0.29	12.21
4	TCMSP	Cinnamomi Ramulus	MOL000708	Benzaldehyde	235	106.13	1.59	0	1	32.63	1.32	1.66	0.01	0.44	12.07
	TCMSP	Paeoniae Radix	MOL000708	Benzaldehyde	235	106.13	1.59	0	1	32.63	1.32	1.66	0.01	0.44	12.07
5	TCMSP, profiling	Cinnamomi Ramulus	MOL000219	Benzoic acid	238	121.12	0.76	0	2	31.55	0.54	0.84	0.02	0.11	12.07
	TCMSP, report, profiling	Moutan Radicis Cortex	MOL000219	Benzoic acid	238	121.12	0.76	0	2	31.55	0.54	0.84	0.02	0.11	12.07
	TCMSP, profiling	Paeoniae Radix	MOL000219	Benzoic acid	238	121.12	0.76	0	2	31.55	0.54	0.84	0.02	0.11	12.07
6	TCMSP	Paeoniae Radix	MOL001752	4-Ethenyl-2-methoxy-phenol	325	150.19	2.1	1	2	38.39	1.36	1.35	0.03	0.36	11.57
7	TCMSP	Paeoniae Radix	MOL001801	Salicylic acid	331	138.13	1.17	2	3	32.13	0.63	0.63	0.03	0.43	12
8	TCMSP, report	Moutan Radicis Cortex	MOL000513	Gallic acid	361	170.13	0.63	4	5	31.69	-0.09	-0.54	0.04	0.41	11.78
	TCMSP, report	Paeoniae Radix	MOL000513	Gallic acid	361	170.13	0.63	4	5	31.69	-0.09	-0.54	0.04	0.41	11.78
9	TCMSP	Cinnamomi Ramulus	MOL000303	Caprylic acid	370	144.24	2.72	1	2	16.4	0.9	1.02	0.02	0
	TCMSP	Poria Sclerotium	MOL000303	Caprylic acid	370	144.24	2.72	1	2	16.4	0.9	1.02	0.02	0
10	TCMSP	Cinnamomi Ramulus	MOL002983	Guasol	447	124.15	1.55	1	2	51.6	1.28	1.48	0.02	0.32	11.92
11	TCMSP	Paeoniae Radix	MOL000579	Hydroquinone	764	110.12	1.3	2	2	29.26	0.89	0.75	0.02	0.43
12	TCMSP	Cinnamomi Ramulus	MOL003493	Naphthalene	906	128.18	2.74	0	0	27.55	1.87	1.92	0.03	0.49
13	TCMSP	Cinnamomi Ramulus	MOL000069	Palmitic acid	960	256.48	6.37	1	2	19.3	1.09	1	0.1	0
	TCMSP	Paeoniae Radix	MOL000069	Palmitic acid	960	256.48	6.37	1	2	19.3	1.09	1	0.1	0
	TCMSP	Poria Sclerotium	MOL000069	Palmitic acid	960	256.48	6.37	1	2	19.3	1.09	1	0.1	0
14	TCMSP	Cinnamomi Ramulus	MOL002998	Phenol	971	94.12	1.56	1	1	36.05	1.5	1.86	0.01	0.44	12.07
15	TCMSP	Cinnamomi Ramulus	MOL000671	()-Menthol	1216	156.3	2.78	1	1	59.33	1.27	1.42	0.03	0.22	11.03
16	TCMSP	Persicae Semen	MOL001332	(±)-Mandelic Acid	1253	152.16	0.92	2	3	43.67	0.11	0.07	0.03	0.44	-2.14
17	TCMSP	Moutan Radicis Cortex	MOL000223	Caffeic acid	2423	180.17	1.37	3	4	25.76	0.21	-0.26	0.05	0.44
18	TCMSP	Cinnamomi Ramulus	MOL000122	1,8-Cineole	2656	154.28	2.15	0	1	39.73	1.57	2.06	0.05	0.24	11.29
19	TCMSP	Cinnamomi Ramulus	MOL001640	Decanoic acid	2863	172.3	3.63	1	2	26.74	0.96	1.06	0.03	0.22
20	TCMSP	Paeoniae Radix	MOL000305	Lauric acid	3756	200.36	4.54	1	2	23.59	1.02	1.1	0.04	0
	TCMSP	Poria Sclerotium	MOL000305	Lauric acid	3756	200.36	4.54	1	2	23.59	1.02	1.1	0.04	0
21	TCMSP	Paeoniae Radix	MOL012220	Saligenol	4962	124.15	0.96	2	2	29.43	0.7	0.53	0.02	0.35
22	TCMSP	Cinnamomi Ramulus	MOL000860	Stearic acid	5091	284.54	7.28	1	2	17.83	1.15	1.22	0.14	0.19
23	TCMSP, profiling	Paeoniae Radix	MOL000842	Sucrose	5768	342.34	-4.31	8	11	7.17	-2.89	-6.67	0.23	0.2
24	TCMSP	Cinnamomi Ramulus	MOL001300	2-Phenylethanol	5830	122.18	1.55	1	1	44.03	1.11	1.13	0.02	0.37	-2.41
25	TCMSP	Cinnamomi Ramulus	MOL000666	Hexanal	5949	100.18	1.85	0	1	55.71	1.25	1.52	0.01	0.23	10.96
	TCMSP	Paeoniae Radix	MOL000666	Hexanal	5949	100.18	1.85	0	1	55.71	1.25	1.52	0.01	0.23	10.96
26	TCMSP	Moutan Radicis Cortex	MOL006869	1-(2,4-Dihydroxyphenyl)ethanone	6724	152.16	1.03	2	3	36.49	0.67	0.46	0.03	0.4	25.1
27	TCMSP	Cinnamomi Ramulus	MOL002163	1-Phenylpropan-1-one	6881	134.19	2.24	0	1	60.17	1.45	1.56	0.02	0.39	10.83
28	TCMSP	Cinnamomi Ramulus	MOL006219	Clorius	6883	136.16	1.69	0	2	45.99	1.25	1.41	0.02	0.4	-2.16
29	TCMSP	Cinnamomi Ramulus	MOL010557	Benzoic acid ethyl ester	6897	150.19	2.03	0	2	27.58	1.26	1.37	0.03	0.41
30	TCMSP	Cinnamomi Ramulus	MOL010257	Isoamyl benzoate	6925	192.28	3.27	0	2	52.2	1.29	1.35	0.05	0.38	4.7
31	TCMSP	Cinnamomi Ramulus	MOL010556	Benzoic acid, 2-phenylethyl ester	6926	226.29	3.59	0	2	31.04	1.35	1.21	0.1	0.46	4.72
32	TCMSP	Paeoniae Radix	MOL005470	1,2,4,5-Tetramethylbenzene	6999	134.24	3.78	0	0	17.74	1.91	1.98	0.03	0.37
33	TCMSP	Paeoniae Radix	MOL002092	1-Hydroxy-2,4-di-tert-butylbenzene	7037	206.36	4.36	1	1	26.74	1.68	1.81	0.06	0.28
34	TCMSP	Cinnamomi Ramulus	MOL001578	1-Phenylethanone	7132	120.16	1.57	0	1	48.19	1.36	1.54	0.02	0.45	25.2
35	TCMSP	Paeoniae Radix	MOL001906	Methylgallate	7150	184.16	0.88	3	5	30.91	0.26	0.06	0.05	0.32	5.67
36	TCMSP	Cinnamomi Ramulus	MOL000202	Moslene (=γ-Terpinene)	7181	136.26	3.45	0	0	33.02	1.88	2.05	0.02	0.27	11.08
	TCMSP	Paeoniae Radix	MOL000202	Moslene (=γ-Terpinene)	7181	136.26	3.45	0	0	33.02	1.88	2.05	0.02	0.27	11.08
37	TCMSP	Cinnamomi Ramulus	MOL000911	Terpilene (=α-Terpinene)	7182	136.26	3.45	0	0	33.95	1.84	2.1	0.02	0.27	11.05
38	TCMSP	Cinnamomi Ramulus	MOL000117	p-cymene	7183	134.24	3.51	0	0	27.2	1.86	2.1	0.02	0.34
39	TCMSP	Cinnamomi Ramulus	MOL000704	Styrene	7220	104.16	2.38	0	0	29.55	1.85	2	0.01	0.5
40	TCMSP	Cinnamomi Ramulus	MOL000475	Anethole	7417	148.22	2.77	0	1	32.49	1.75	1.81	0.03	0	1.68
41	TCMSP	Cinnamomi Ramulus	MOL002541	3-Phenylpropan aldehyde	7421	134.19	1.97	0	1	19.01	1.35	1.61	0.02	0.39
42	TCMSP	Cinnamomi Ramulus	MOL010560	2-Phenylethyl formate	7425	150.19	1.88	0	2	30	1.23	1.34	0.03	0.4	7.07
43	TCMSP	Cinnamomi Ramulus	MOL005979	Papite	7559	56.07	0.52	0	1	31.04	1.07	1.53	0	0.46	12.4
44	TCMSP	Cinnamomi Ramulus	MOL004664	Heptanoic acid	7803	130.21	2.26	1	2	13.38	0.87	0.98	0.01	0.26
45	TCMSP	Cinnamomi Ramulus	MOL003050	Nonanoic acid	7866	158.27	3.17	1	2	40.51	0.92	1.08	0.02	0.23	4.15
46	TCMSP	Poria Sclerotium	MOL000302	Undekansaeure (=Undecylic acid)	7888	186.33	4.09	1	2	30.14	0.98	0.94	0.03	0	4.93
47	TCMSP	Paeoniae Radix	MOL000879	Methyl palmitate	7889	270.51	6.62	0	2	18.09	1.37	1.18	0.12	0.14
48	TCMSP	Cinnamomi Ramulus	MOL004784	Stenol	7928	270.56	7.36	1	1	12.66	1.33	0.92	0.11	0.15
49	TCMSP	Paeoniae Radix	MOL000868	Icosane	7929	282.62	9.5	0	0	8.46	1.83	1.8	0.13	0.13
50	TCMSP	Cinnamomi Ramulus	MOL010551	Dimethylglycol phthalate	8041	282.32	1.28	0	6	55.66	0.15	-0.18	0.15	0.27	5.74
51	TCMSP	Cinnamomi Ramulus	MOL013023	Biosol	8075	150.24	3.24	1	1	44.42	1.59	1.76	0.03	0.36	11.56
52	TCMSP	Cinnamomi Ramulus	MOL005501	Anthracene	8111	178.24	3.65	0	0	17.74	1.89	1.91	0.1	0.52
53	TCMSP	Moutan Radicis Cortex	MOL000114	Vanillic acid	8155	168.16	1.15	2	4	35.47	0.43	0.09	0.04	0.34	11.62
	TCMSP	Paeoniae Radix	MOL000114	Vanillic acid	8155	168.16	1.15	2	4	35.47	0.43	0.09	0.04	0.34	11.62
54	TCMSP	Cinnamomi Ramulus	MOL003177	Syringaldehyde	8333	182.19	1.29	1	4	67.06	0.71	0.4	0.05	0.25	11.47
55	TCMSP	Cinnamomi Ramulus	MOL001452	Protocatechualdehyde	8438	138.13	1.06	2	3	38.35	0.43	0.21	0.03	0.42	11.93
56	TCMSP	Cinnamomi Ramulus	MOL002361	Terragon	8483	148.22	2.82	0	1	36.59	1.72	1.83	0.03	0.34	1.79
57	TCMSP	Cinnamomi Ramulus	MOL002046	Hexanoic acid	8552	116.18	1.81	1	2	73.08	0.8	0.93	0.01	0.27	10.81
	TCMSP	Moutan Radicis Cortex	MOL002046	Hexanoic acid	8552	116.18	1.81	1	2	73.08	0.8	0.93	0.01	0.27	10.81
58	TCMSP	Cinnamomi Ramulus	MOL000492	(+)-Catechin	8711	290.29	1.92	5	6	54.83	-0.03	-0.73	0.24	0	0.61
	TCMSP, report	Moutan Radicis Cortex	MOL000492	(+)-Catechin	8711	290.29	1.92	5	6	54.83	-0.03	-0.73	0.24	0	0.61
	TCMSP	Paeoniae Radix	MOL000492	(+)-Catechin	8711	290.29	1.92	5	6	54.83	-0.03	-0.73	0.24	0	0.61
59	TCMSP	Cinnamomi Ramulus	MOL002496	Sulcatone	9478	126.22	1.79	0	1	26.36	1.35	1.52	0.01	0.31
60	TCMSP	Cinnamomi Ramulus	MOL001862	Cadalin	9808	198.33	4.91	0	0	12.96	1.95	1.93	0.08	0.38
61	TCMSP	Cinnamomi Ramulus	MOL010547	2-Phenylpropenal	9890	132.17	1.99	0	1	30.68	1.38	1.61	0.02	0.46	-1.93
62	TCMSP	Cinnamomi Ramulus	MOL002691	3-Methylbutanoic acid	10001	102.15	1.15	1	2	62.17	0.82	1.09	0.01	0.29	11.36
63	TCMSP	Moutan Radicis Cortex	MOL000263	Oleanolic acid	10062	456.78	6.42	2	3	29.02	0.59	0.07	0.76	0.25
64	TCMSP	Cinnamomi Ramulus	MOL003534	Cadinene	10207	204.39	4.75	0	0	17.12	1.88	2.06	0.08	0.25
65	TCMSP	Persicae Semen	MOL001366	Mandelonitrile	10304	133.16	1.2	1	2	48.36	0.68	0.56	0.02	0.47	-1.9
66	TCMSP	Cinnamomi Ramulus	MOL000699	m-Cymol	10355	134.24	3.51	0	0	48.85	1.88	2.1	0.02	0.34	11.33
67	TCMSP	Paeoniae Radix	MOL001393	Myristic acid	10539	228.42	5.46	1	2	21.18	1.07	0.99	0.07	0.19
68	TCMSP	Cinnamomi Ramulus	MOL000865	Hexadecane	10540	226.5	7.67	0	0	12.32	1.81	1.85	0.06	0.14
	TCMSP	Paeoniae Radix	MOL000865	Hexadecane	10540	226.5	7.67	0	0	12.32	1.81	1.85	0.06	0.14
69	TCMSP, profiling	Moutan Radicis Cortex	MOL000874	Paeonol	10621	166.19	1.29	1	3	28.79	0.93	0.84	0.04	0.32
	TCMSP, report, profiling	Paeoniae Radix	MOL000874	Paeonol	10621	166.19	1.29	1	3	28.79	0.93	0.84	0.04	0.32
70	TCMSP	Cinnamomi Ramulus	MOL000608	()-Terpinen-4-ol	10756	154.28	2.55	1	1	81.41	1.36	1.66	0.03	0.25	10.81
71	TCMSP	Cinnamomi Ramulus	MOL003525	Pyruvophenone	10885	148.17	1.31	0	2	35.93	0.92	0.93	0.03	0.43	11.18
72	TCMSP	Cinnamomi Ramulus	MOL012174	o-Anisic acid	10892	152.16	1.42	1	3	73.92	0.83	0.92	0.03	0.35	11.95
73	TCMSP	Cinnamomi Ramulus	MOL001394	Octadecane	11145	254.56	8.58	0	0	9.81	1.83	1.83	0.09	0.14
	TCMSP	Paeoniae Radix	MOL001394	Octadecane	11145	254.56	8.58	0	0	9.81	1.83	1.83	0.09	0.14
74	TCMSP	Cinnamomi Ramulus	MOL002229	Heptacosane	11146	380.83	12.69	0	0	8.18	1.88	1.8	0.36	0.18
75	TCMSP	Paeoniae Radix	MOL000610	Tridecane	11882	184.41	6.3	0	0	17.89	1.78	1.96	0.03	0.19
76	TCMSP	Cinnamomi Ramulus	MOL000864	Pentadecane	11885	212.47	7.22	0	0	13.98	1.81	1.92	0.05	0.15
77	TCMSP	Paeoniae Radix	MOL004929	Pentadecanol	11891	228.47	5.99	1	1	13.73	1.3	1.06	0.06	0
78	TCMSP	Paeoniae Radix	MOL000867	Heptadecane	11892	240.53	8.13	0	0	8.64	1.84	1.87	0.07	0.14
79	TCMSP	Paeoniae Radix	MOL001619	Nonadecane	11895	268.59	9.04	0	0	8.52	1.83	1.7	0.11	0.16
80	TCMSP	Paeoniae Radix	MOL000869	Henicosane	11897	296.65	9.95	0	0	8.41	1.84	1.8	0.15	0.13
81	TCMSP	Paeoniae Radix	MOL001399	Docosane	11899	310.68	10.41	0	0	8.37	1.85	1.64	0.18	0.13
82	TCMSP	Paeoniae Radix	MOL001401	Hexacosane	11901	366.8	12.23	0	0	8.21	1.92	1.65	0.31	0.12
83	TCMSP	Cinnamomi Ramulus	MOL005121	Octadecanal	12016	268.54	7.33	0	1	15.38	1.46	1.29	0.12	0.17
84	TCMSP	Paeoniae Radix	MOL000880	Tricosane	12017	324.71	10.86	0	0	8.33	1.85	1.68	0.21	0.13
85	TCMSP	Cinnamomi Ramulus	MOL001747	Tetracosane	12072	338.74	11.32	0	0	8.28	1.88	1.62	0.24	0.15
	TCMSP	Paeoniae Radix	MOL001747	Tetracosane	12072	338.74	11.32	0	0	8.28	1.88	1.62	0.24	0.15
86	TCMSP	Cinnamomi Ramulus	MOL010259	3-Methylbutyl 3-methylbutanoate	12093	172.3	2.98	0	2	22.26	1.25	1.44	0.03	0.24
87	TCMSP	Moutan Radicis Cortex	MOL007373	1-(2,3-Dihydroxy-4-methoxyphenyl)ethanone	12292	182.19	1.02	2	4	32.96	0.81	0.63	0.05	0.3	15.23
88	TCMSP	Paeoniae Radix	MOL001907	Progallin A	12693	198.19	1.23	3	5	25.61	0.33	0.11	0.06	0.34
89	TCMSP	Paeoniae Radix	MOL001396	Pentadecylic acid	13249	242.45	5.91	1	2	20.18	1.08	0.88	0.08	0.18
90	TCMSP	Cinnamomi Ramulus	MOL000905	(±)-β-Pinene	14198	136.26	2.93	0	0	44.77	1.85	2.29	0.05	0.28	11.32
91	TCMSP	Cinnamomi Ramulus	MOL002193	Cerulignol	16763	166.24	2.95	1	2	62.43	1.42	1.42	0.04	0.24	0.25
92	TCMSP	Paeoniae Radix	MOL000023	L-Limonen (=Hemo-sol)	20939	136.26	3.5	0	0	39.84	1.83	2.12	0.02	0	11.68
	TCMSP	Cinnamomi Ramulus	MOL000234	L-Limonen (=Hemo-sol)	20939	136.26	3.5	0	0	38.09	1.83	2.13	0.02	0.29	11.64
93	TCMSP	Cinnamomi Ramulus	MOL008668	2-Ethoxypropanol	27347	104.17	0.24	1	2	47.47	0.67	0.43	0.01	0.2	11.14
94	TCMSP	Cinnamomi Ramulus	MOL000197	Myrcene	28993	136.26	3.69	0	0	24.96	1.84	1.98	0.02	0.37
95	TCMSP	Paeoniae Radix	MOL001392	Methyl myristate	29024	242.45	5.71	0	2	19.68	1.36	1.19	0.08	0.14
96	TCMSP	Cinnamomi Ramulus	MOL005976	Tetradecanal	29031	212.42	5.5	0	1	12.36	1.41	1.36	0.05	0.18
97	TCMSP	Cinnamomi Ramulus	MOL009625	2,6,10,15-Tetramethylheptadecane	37608	296.65	9.13	0	0	13.73	1.84	1.88	0.13	0.2
98	TCMSP	Cinnamomi Ramulus	MOL011848	d-Piperitone	55294	152.26	2.77	0	1	48.75	1.42	1.67	0.03	0.3	10.78
99	TCMSP	Paeoniae Radix	MOL000607	Dehydro-p-cymene	56173	132.22	3.31	0	0	11.63	1.88	1.93	0.02	0.44
100	TCMSP	Cinnamomi Ramulus	MOL002334	Homocresol	56245	152.21	2.49	1	2	35.9	1.36	1.42	0.03	0.27	11.24
101	TCMSP	Moutan Radicis Cortex	MOL000211	Mairin(=Betulinic acid)	58496	456.78	6.52	2	3	55.38	0.73	0.22	0.78	0.26	8.87
102	TCMSP	Paeoniae Radix	MOL002776	Baicalin	58507	446.39	0.64	6	11	40.12	-0.85	-1.74	0.75	0.36	17.36
103	TCMSP, report	Moutan Radicis Cortex	MOL009092	Pentagalloylglucose	58735	940.72	3.69	15	26	3.01	-3.08	-4.17	0.21	0.45
	TCMSP, report	Paeoniae Radix	MOL009092	Pentagalloylglucose	58735	940.72	3.69	15	26	3.01	-3.08	-4.17	0.21	0.45
104	TCMSP	Cinnamomi Ramulus	MOL000875	Cedrol	59018	222.41	3.16	1	1	16.23	1.35	1.46	0.12	0.24
105	TCMSP	Cinnamomi Ramulus	MOL010554	Benzocyclobutene	62868	104.16	2.43	0	0	48.07	1.86	2.02	0.03	0.4	11.86
106	TCMSP	Cinnamomi Ramulus	MOL000073	ent-Epicatechin	65230	290.29	1.92	5	6	48.96	0.02	-0.64	0.24	0.34	0.63
107	TCMSP	Moutan Radicis Cortex	MOL001551	Trochol	65272	442.8	6.31	2	2	15.48	0.84	0.35	0.78	0.24
108	TCMSP	Paeoniae Radix	MOL000361	Amyrin	65921	426.8	7.3	1	1	17.6	1.45	1.29	0.76	0.22
109	TCMSP	Persicae Semen	MOL000296	Hederagenin	66038	414.79	8.08	1	1	36.91	1.32	0.96	0.75	0	5.35
	TCMSP	Poria Sclerotium	MOL000296	Hederagenin	66038	414.79	8.08	1	1	36.91	1.32	0.96	0.75	0	5.35
110	TCMSP	Poria Sclerotium	MOL000299	Trimethyl citrate	66725	234.23	-0.64	1	7	67.61	-0.06	-0.33	0.07	0	6.28
111	TCMSP	Paeoniae Radix	MOL005368	Methyl tricosanoate	68045	368.72	9.81	0	2	14.61	1.43	1.08	0.33	0.16
112	TCMSP	Cinnamomi Ramulus	MOL010561	2-Methoxyphenylacetone	71222	164.22	1.44	0	2	39.61	1.22	1.38	0.04	0.32	4.75
113	TCMSP	Cinnamomi Ramulus	MOL011432	cis-pinocarveol	79657	152.26	1.83	1	1	51.38	1.27	1.45	0.06	0.27	11.42
114	TCMSP	Cinnamomi Ramulus	MOL001121	(-)-Myrtenol	79660	152.26	1.78	1	1	49.98	1.25	1.5	0.06	0.21	11.55
115	TCMSP	Paeoniae Radix	MOL000508	Friedelin	82597	426.8	7.3	0	1	29.16	1.43	1.38	0.76	0
116	TCMSP	Poria Sclerotium	MOL000286	β-Amyrin acetate	83201	468.84	7.68	0	2	9.11	1.42	1.21	0.74	0
117	TCMSP	Cinnamomi Ramulus	MOL000019	D-Camphene	83259	136.26	2.93	0	0	34.98	1.81	2.19	0.04	0	11.29
118	TCMSP	Cinnamomi Ramulus	MOL002153	Espatulenol	83268	220.39	3.01	1	1	82.33	1.37	1.49	0.12	0.28	12.04
119	TCMSP	Persicae Semen	MOL001358	Gibberellin 7	83756	330.41	1.5	2	5	73.8	-0.18	-0.4	0.5	0.35	9.79
120	TCMSP	Cinnamomi Ramulus	MOL001217	Bornyl acetate	83962	196.32	2.35	0	2	65.55	1.3	1.59	0.08	0.22	6.94
121	TCMSP	Cinnamomi Ramulus	MOL000266	β-Cubebene	84031	204.39	4.22	0	0	32.81	1.83	2.02	0.11	0.25	6.59
122	TCMSP	Persicae Semen	MOL001901	24-Methylenecycloartanol	85017	440.83	7.86	1	1	10.4	1.42	1.13	0.79	0.25
123	TCMSP	Moutan Radicis Cortex	MOL007372	3-Hydroxy-4-methoxyacetophenone	86383	166.19	1.29	1	3	22.32	0.85	0.66	0.04	0.33
124	TCMSP	Cinnamomi Ramulus	MOL008656	(1R,3R,4S)-3,4-Dimethylcyclohexan-1-ol	88433	128.24	2	1	1	43.57	1.26	1.58	0.02	0.2	11.01
125	TCMSP	Moutan Radicis Cortex	MOL003881	6-Hydroxycoumarin	89873	162.15	1.63	1	3	15.8	0.73	0.47	0.05	0.43
126	TCMSP	Cinnamomi Ramulus	MOL010546	Coumarin 343	97809	285.32	2.69	1	5	24.02	0.65	0.18	0.38	0.28
127	TCMSP	Paeoniae Radix	MOL006991	(1R,4S,5S)-4,7,7-Trimethyl-8-oxabicyclo[2.2.2]octan-5-ol	98028	170.28	1.18	1	2	45.44	0.89	0.91	0.06	0.24	11.43
128	TCMSP	Persicae Semen	MOL001372	Salireposide	104951	406.42	0.83	5	9	13.51	-1.03	-1.79	0.53	0.36
129	TCMSP	Persicae Semen	MOL001365	Prunasin	106360	295.32	-0.55	4	7	12.61	-0.79	-1.07	0.18	0.34
130	TCMSP	Paeoniae Radix	MOL000463	epi-Friedelanol	106523	428.82	7.49	1	1	27.34	1.45	1.28	0.76	0
131	TCMSP, report	Moutan Radicis Cortex	MOL007364	Apiopaeonoside	113130	460.48	-2.03	6	12	16.73	-1.79	-2.48	0.64	0.29
132	TCMSP	Paeoniae Radix	MOL007014	8-Debenzoylpaeonidanin	118838	390.43	-3.28	5	10	31.74	-1.56	-2.17	0.45	0.2	7.63
133	TCMSP	Cinnamomi Ramulus	MOL010555	1,2-Dibenzoylethane	120096	238.3	3.19	0	2	57.97	0.98	0.65	0.12	0.46	30.39
134	TCMSP	Moutan Radicis Cortex	MOL001246	(1S)-(-)-Nopinone	138303	138.23	1.52	0	1	57.86	1.23	1.6	0.05	0.28	11.1
135	TCMSP	Cinnamomi Ramulus	MOL000130	D-Camphor	139902	152.26	1.94	0	1	67.17	1.29	1.71	0.05	0.27	11.34
136	TCMSP	Cinnamomi Ramulus	MOL004707	tau-Cadinol (=T-cedrelanol)	141284	222.41	3.78	1	1	36.51	1.31	1.42	0.09	0.23	7.84
137	TCMSP	Paeoniae Radix	MOL005043	Campesterol (=Campesterol-3-O-β-D-glucopyranoside_qt)	151215	400.76	7.63	1	1	37.58	1.32	0.94	0.71	0.23	4.43
	TCMSP	Persicae Semen	MOL000493	Campesterol (=Campesterol-3-O-β-D-glucopyranoside_qt)	151215	400.76	7.63	1	1	37.58	1.32	0.94	0.71	0.23	4.43
138	TCMSP	Persicae Semen	MOL001337	Benzyl glucopyranoside	164205	270.31	-0.52	4	6	12.39	-0.7	-1.04	0.14	0.32
139	TCMSP	Cinnamomi Ramulus	MOL000358	β-Sitosterol (=Sitosterol)	192962	414.79	8.08	1	1	36.91	1.32	0.99	0.75	0.23	5.36
	TCMSP	Moutan Radicis Cortex	MOL000359	β-Sitosterol (=Sitosterol)	192962	414.79	8.08	1	1	36.91	1.32	0.87	0.75	0.22	5.37
	TCMSP	Paeoniae Radix	MOL000359	β-Sitosterol (=Sitosterol)	192962	414.79	8.08	1	1	36.91	1.32	0.87	0.75	0.22	5.37
	TCMSP	Persicae Semen	MOL000358	β-Sitosterol (=Sitosterol)	192962	414.79	8.08	1	1	36.91	1.32	0.99	0.75	0.23	5.36
140	TCMSP	Cinnamomi Ramulus	MOL000171	Guaiol	198233	222.41	3.91	1	1	38.77	1.36	1.47	0.09	0.22	6.2
141	TCMSP	Persicae Semen	MOL001362	GA95	276658	330.41	1.38	2	5	20.01	-0.24	-0.64	0.49	0.37
142	TCMSP	Cinnamomi Ramulus	MOL002972	β-Bisabolene	357775	186.32	4.66	0	0	33.46	1.93	1.97	0.05	0.37	0	4	5.17
143	TCMSP	Cinnamomi Ramulus	MOL004576	Taxifolin	388626	304.27	1.49	5	7	57.84	-0.23	-0.8	0.27	0.39	14.41
144	TCMSP	Paeoniae Radix	MOL000578	Arbutin	389765	272.28	-0.61	5	7	6.82	-0.93	-1.25	0.15	0.29
145	TCMSP	Cinnamomi Ramulus	MOL002453	(-)-Camphene	389793	136.26	2.93	0	0	34.98	1.81	2.21	0.04	0.28	11.29
146	TCMSP	Cinnamomi Ramulus	MOL000126	(-)-Nopinene(=(-)-β-Pinene)	389794	136.26	2.93	0	0	44.84	1.8	2.12	0.05	0.27	11.32
147	TCMSP	Cinnamomi Ramulus	MOL000125	(-)-α-Pinene	389795	136.26	2.87	0	0	46.25	1.85	2.3	0.05	0.25	11.42
148	TCMSP	Moutan Radicis Cortex	MOL001692	β-D-Apiose	390198	150.15	-2.17	4	5	118.53	-1.46	-3.61	0.03	0.24	11.16
149	TCMSP	Paeoniae Radix	MOL006765	Peonidin	390370	301.29	1.92	4	6	26.92	0.27	-0.41	0.27	0.32
150	TCMSP	Cinnamomi Ramulus	MOL000166	(-)-α-Bisabolol	390796	222.41	4.31	1	1	21.62	1.41	1.37	0.07	0.26
151	TCMSP	Cinnamomi Ramulus	MOL002085	a-Cubebene	390811	204.39	4.17	0	0	16.73	1.83	2.1	0.11	0.25
152	TCMSP	Cinnamomi Ramulus	MOL000027	(-)-α-curcumene	390812	202.37	5.34	0	0	4.68	1.93	1.99	0.06	0
153	TCMSP	Cinnamomi Ramulus	MOL000698	(R)-(−)-α-Phellandrene	390915	136.26	3.25	0	0	27.51	1.86	2.17	0.02	0.3
154	Previous report, profiling	Moutan Radicis Cortex	MOL001924	Paeoniflorin	390957	480.51	-1.28	5	11	53.87	-1.47	-1.86	0.79	0.34	13.88
	TCMSP, report, profiling	Paeoniae Radix	MOL001924	Paeoniflorin	390957	480.51	-1.28	5	11	53.87	-1.47	-1.86	0.79	0.34	13.88
155	TCMSP	Paeoniae Radix	MOL007019	Eugeniin	391036	938.7	3.38	15	26	10.06	-2.4	-3.57	0.13	0.4
156	TCMSP	Paeoniae Radix	MOL006798	Pedunculagin	391045	784.57	1.83	13	22	37.81	-2.7	-3.63	0.07	0.38	8.55
157	Previous report, profling	Moutan Radicis Cortex	MOL003867	Paeonolide	391226	460.48	-1.85	6	12	6.3	-1.42	-2.09	0.64	0.3
	TCMSP, report, profiling	Paeoniae Radix	MOL003867	Paeonolide	391226	460.48	-1.85	6	12	6.3	-1.42	-2.09	0.64	0.3
158	TCMSP	Moutan Radicis Cortex	MOL007367	Paeonoside	391227	328.35	-0.62	4	8	18.52	-0.86	-1.04	0.24	0.28
159	TCMSP	Cinnamomi Ramulus	MOL000270	(+)-Carene	391428	136.26	2.87	0	0	45.2	1.84	2.15	0.04	0.27	11.44
160	TCMSP	Cinnamomi Ramulus	MOL000198	(R)-Linalool	391430	154.28	2.74	1	1	39.8	1.33	1.36	0.02	0.32	6.48
161	TCMSP	Cinnamomi Ramulus	MOL000257	(-)-β-Phellandrene	391433	136.26	3.31	0	0	40.44	1.83	2.1	0.02	0.31	10.91
162	TCMSP	Cinnamomi Ramulus	MOL000118	(S)-(-)-α-Terpineol	391434	154.28	2.42	1	1	48.8	1.39	1.72	0.03	0.27	11.35
163	TCMSP, report, profiling	Cinnamomi Ramulus	MOL002295	Cinnamic acid	392447	148.17	1.9	1	2	19.68	0.91	0.96	0.03	0.47
164	TCMSP	Poria Sclerotium	MOL000298	Ergosterol	392539	396.72	6.93	1	1	14.29	1.47	1.04	0.72	0
165	TCMSP	Cinnamomi Ramulus	MOL000252	Farnesol	392816	222.41	4.76	1	1	28.44	1.32	1.07	0.06	0.28
166	TCMSP	Persicae Semen	MOL001356	Methyl β-D-glucoside	392933	194.21	-2.1	4	6	24.46	-1.13	-3.28	0.05	0.19
167	TCMSP,profiling	Cinnamomi Ramulus	MOL000675	Oleic acid	393217	282.52	6.84	1	2	33.13	1.17	0.78	0.14	0.2	4.99
	TCMSP,profiling	Moutan Radicis Cortex	MOL000675	Oleic acid	393217	282.52	6.84	1	2	33.13	1.17	0.78	0.14	0.2	4.99
	TCMSP,profiling	Paeoniae Radix	MOL000675	Oleic acid	393217	282.52	6.84	1	2	33.13	1.17	0.78	0.14	0.2	4.99
168	Previous report	Moutan Radicis Cortex	MOL001932	Galloylpaeoniflorin	433028	632.62	-0.04	7	15	3.03	-1.77	-2.78	0.42	0.36
	TCMSP, report	Paeoniae Radix	MOL001932	Galloylpaeoniflorin	433028	632.62	-0.04	7	15	3.03	-1.77	-2.78	0.42	0.36
169	TCMSP	Cinnamomi Ramulus	MOL001602	1,4-Cadinadiene	452965	204.39	4.75	0	0	16.73	1.85	2.11	0.08	0.24
170	TCMSP	Cinnamomi Ramulus	MOL000035	β-selinene	453018	204.39	4.81	0	0	24.39	1.83	2.12	0.08	0
171	TCMSP	Cinnamomi Ramulus	MOL003573	Calacorene	460799	200.35	4.79	0	0	16.2	1.89	1.99	0.08	0
172	TCMSP	Cinnamomi Ramulus	MOL000937	Isoledene	462028	204.39	4.36	0	0	49.01	1.82	2.08	0.1	0.22	12.47
173	TCMSP	Cinnamomi Ramulus	MOL010550	4-Methyl-2-(1,5-dimethyl-4-hexenyl)-3-cyclohexen-1-ol	484324	222.41	4.36	1	1	39.63	1.44	1.33	0.07	0.26	3.92
174	TCMSP	Paeoniae Radix	MOL007021	trans-β-Terpinyl benzoate	496032	258.39	4.51	0	2	46.89	1.49	1.42	0.12	0.37	5.02
175	TCMSP	Poria Sclerotium	MOL000273	(2R)-2-[(3S,5R,10S,13R,14R,16R,17R)-3,16-Dihydroxy-4,4,10,13,14-pentamethyl-2,3,5,6,12,15,16,17-octahydro-1H-cyclopenta[a]phenanthren-17-yl]-6-methylhept-5-enoic acid	523468	470.76	5.41	3	4	30.93	0.01	-0.76	0.81	0	6.81
176	TCMSP, report, profiling	Cinnamomi Ramulus	MOL000991	Cinnamaldehyde	553117	132.17	1.95	0	1	31.99	1.35	1.48	0.02	0.48	4.73
177	TCMSP	Cinnamomi Ramulus	MOL000771	p-Coumaric acid	553148	164.17	1.64	2	3	43.29	0.46	0.13	0.04	0.45	4.43
178	TCMSP	Cinnamomi Ramulus	MOL013205	p-Methoxycinnamaldehyde	556586	162.2	1.93	0	2	59.64	1.12	0.98	0.04	0.39	4.34
179	TCMSP, report	Cinnamomi Ramulus	MOL003530	O-Methoxycinnamaldehyde	556589	162.2	1.93	0	2	26.52	1.19	1.18	0.04	0.36
180	TCMSP, report, profiling	Persicae Semen	MOL001320	Amygdalin	570897	457.48	-2.3	7	12	4.42	-1.91	-2.4	0.61	0.33
181	TCMSP	Cinnamomi Ramulus	MOL010552	2-Methyl-N-phenylmaleimide	600574	187.21	1.84	0	3	87.36	0.77	0.37	0.06	0.42	2.93
182	TCMSP	Cinnamomi Ramulus	MOL003047	Borneol (=[(1S)-endo]-(-)-Borneol)	1013314	154.28	1.98	1	1	83.54	1.22	1.43	0.05	0.25	11.33
	TCMSP	Paeoniae Radix	MOL000244	Borneol (=[(1S)-endo]-(-)-Borneol)	1013314	154.28	1.98	1	1	81.8	1.22	1.47	0.05	0.24	11.36
183	TCMSP	Cinnamomi Ramulus	MOL002040	(+)-Fenchone	1013316	152.26	2.36	0	1	72.64	1.35	1.74	0.05	0.29	11.25
184	TCMSP	Cinnamomi Ramulus	MOL000597	Neryl acetate	1266018	196.32	3.31	0	2	57.47	1.25	1.4	0.04	0.27	7.92
185	TCMSP	Persicae Semen	MOL000397	cis-p-Coumarate	1266072	164.17	1.64	2	3	45.98	0.46	0.36	0.04	0	4.89
186	TCMSP	Cinnamomi Ramulus	MOL000247	(Z,Z)-Farnesol	1266073	222.41	4.76	1	1	41.14	1.25	1.15	0.06	0.28	6.29
187	TCMSP	Cinnamomi Ramulus	MOL010558	cis-2-Methoxycinnamic Acid	1302225	178.2	1.89	1	3	41.58	0.8	0.78	0.05	0.28	4.55
188	TCMSP	Cinnamomi Ramulus	MOL000474	(-)-Epoxycaryophyllene (=(-)-β-Caryophyllene epoxide)	1379451	220.39	3.52	0	1	35.94	1.57	1.83	0.13	0	6.09
189	TCMSP	Paeoniae Radix	MOL007001	2-Methoxy-5-[(Z)-prop-1-enyl]phenol	1401086	164.22	2.5	1	2	58.73	1.36	1.38	0.04	0.32	4.4
190	TCMSP	Persicae Semen	MOL001955	Heriguard (=Chlorogenic acid)	1405788	354.34	-0.42	6	9	11.93	-1.03	-1.71	0.33	0.37
191	TCMSP	Moutan Radicis Cortex	MOL007365	Galloyl-oxypaeoniflorin	2300214	648.62	-0.31	8	16	3.2	-2.18	-3.08	0.39	0.38
192	TCMSP	Cinnamomi Ramulus	MOL007946	Torreyol	2341398	222.41	3.78	1	1	33.04	1.32	1.37	0.09	0.25	7.34
193	TCMSP, profiling	Cinnamomi Ramulus	MOL003537	T-Muurolol	2341413	222.41	3.78	1	1	30.41	1.36	1.44	0.09	0.23	7.11
194	TCMSP	Cinnamomi Ramulus	MOL004102	2-Coumarate	3942928	164.17	1.64	2	3	53.6	0.48	0.28	0.04	0	7.49
195	TCMSP	Cinnamomi Ramulus	MOL001442	phytol	4444094	296.6	7.34	1	1	33.82	1.23	0.85	0.13	0.22	2.34
196	TCMSP	Cinnamomi Ramulus	MOL000131	Linoleic acid	4444105	280.5	6.39	1	2	41.9	1.16	0.9	0.14	0.25	7.5
	TCMSP	Paeoniae Radix	MOL000131	Linoleic acid	4444105	280.5	6.39	1	2	41.9	1.16	0.9	0.14	0.25	7.5
	TCMSP	Persicae Semen	MOL000131	Linoleic acid	4444105	280.5	6.39	1	2	41.9	1.16	0.9	0.14	0.25	7.5
197	TCMSP	Paeoniae Radix	MOL000449	Stigmasterol	4444352	412.77	7.64	1	1	43.83	1.44	1	0.76	0.22	5.57
198	TCMSP	Cinnamomi Ramulus	MOL010559	2-Coumarinate	4444389	164.17	1.64	2	3	60.17	0.46	0.36	0.04	0.43	7.58
199	TCMSP	Moutan Radicis Cortex	MOL000422	Kaempferol	4444395	286.25	1.77	4	6	41.88	0.26	-0.55	0.24	0	14.74
200	TCMSP	Paeoniae Radix	MOL004355	Spinasterol	4444708	412.77	7.64	1	1	42.98	1.44	1.04	0.76	0.21	5.32
201	TCMSP	Cinnamomi Ramulus	MOL000479	Farnesene	4444849	204.39	5.52	0	0	17.42	1.95	2.21	0.05	0
202	TCMSP	Cinnamomi Ramulus	MOL012439	α-Humulene	4444853	204.39	5.04	0	0	22.83	1.84	2.07	0.06	0.28
203	TCMSP	Cinnamomi Ramulus	MOL001556	Isocaryophyllene	4444855	204.39	4.75	0	0	27.3	1.83	2.06	0.09	0.28
204	TCMSP	Paeoniae Radix	MOL002714	Baicalein	4444924	270.25	2.33	3	5	33.52	0.63	-0.05	0.21	0.36	16.25
205	TCMSP	Cinnamomi Ramulus	MOL002124	β-Asarone	4445072	208.28	2.74	0	3	35.61	1.45	1.24	0.06	0.15	4.46
206	TCMSP	Persicae Semen	MOL001369	Grandidentatin	4445089	424.49	1.03	5	9	10.56	-0.9	-1.46	0.54	0.3
207	TCMSP	Cinnamomi Ramulus	MOL002062	Ethyl methoxycinnamate	4445096	206.26	2.49	0	3	23.36	1.11	0.82	0.06	0.31
208	TCMSP, profiling	Paeoniae Radix	MOL001002	Ellagic acid	4445149	302.2	1.48	4	8	43.06	-0.44	-1.41	0.43	0.43	-1.04
209	TCMSP	Cinnamomi Ramulus	MOL003526	Cinnamyl acetate	4445319	176.23	2.07	0	2	21.15	1.29	1.29	0.04	0.38
210	TCMSP	Poria Sclerotium	MOL000301	2-Lauroleic acid	4445856	198.34	4.52	1	2	31.42	1.03	1.08	0.04	0	5.69
211	TCMSP	Cinnamomi Ramulus	MOL001746	(Z)-Octadec-9-enamide	4446508	281.54	6.23	2	2	31.2	1.26	1.07	0.14	0.19	4.84
	TCMSP	Paeoniae Radix	MOL001746	(Z)-Octadec-9-enamide	4446508	281.54	6.23	2	2	31.2	1.26	1.07	0.14	0.19	4.84
212	TCMSP	Poria Sclerotium	MOL000282	5α-ergosta-7,22-dien-3β-ol	4446722	398.74	7.18	1	1	43.51	1.32	0.91	0.72	0	5.11
213	TCMSP	Paeoniae Radix	MOL001641	Methyl linoleate	4447491	294.53	6.64	0	2	41.93	1.44	1.08	0.17	0.21	6.05
214	TCMSP	Cinnamomi Ramulus	MOL002504	Peruviol	4447568	222.41	4.56	1	1	29.61	1.47	1.44	0.06	0.29
215	TCMSP	Persicae Semen	MOL001323	Sitosterol α1 (=24-Ethylidenelophenol)	4447663	426.8	8.15	1	1	43.28	1.41	0.97	0.78	0.24	5.64
216	TCMSP	Cinnamomi Ramulus	MOL010957	(Z)-Ethyl cinnamate	4447700	176.23	2.5	0	2	37.28	1.27	1.52	0.04	0.38	7.63
217	TCMSP	Poria Sclerotium	MOL000278	β-Glucan	4450617	516.56	-4.88	9	15	0.73	-3.13	-7.78	0.7	0
218	TCMSP	Cinnamomi Ramulus	MOL000935	α-Guriunene	4476589	204.39	4.36	0	0	53.83	1.86	2.17	0.1	0.24	11.92
219	TCMSP	Moutan Radicis Cortex	MOL007385	Octadecyl (E)-3-(3,4-dihydroxyphenyl)prop-2-enoate	4478380	432.71	9.33	2	4	3.18	0.98	0.6	0.55	0.24
220	Previous report	Moutan Radicis Cortex		Suffruticoside D	4479253
221	TCMSP	Poria Sclerotium	MOL000277	Tumulosic acid	4479738	486.81	6.16	3	4	15.95	0.02	-0.51	0.81	0
222	TCMSP	Cinnamomi Ramulus	MOL000922	(R)-p-Menth-1-en-4-ol	4483313	154.28	2.55	1	1	32.16	1.33	1.52	0.03	0.26	11.39
223	TCMSP	Cinnamomi Ramulus	MOL011169	Ergosterol peroxide (=Peroxyergosterol)	4508532	428.72	6.73	1	3	44.39	0.86	0.43	0.82	0.24	4.06
	TCMSP	Poria Sclerotium	MOL000283	Ergosterol peroxide (=Peroxyergosterol)	4508532	430.74	7.17	1	3	40.36	0.84	0.34	0.81	0	3.43
224	TCMSP	Cinnamomi Ramulus	MOL002213	(Z)-chalcone	4513675	208.27	3.7	0	1	47.27	1.48	1.18	0.08	0.53	20.25
225	TCMSP	Paeoniae Radix	MOL002883	Ethyl oleate	4515636	310.58	7.44	0	2	32.4	1.4	1.1	0.19	0.19	4.85
226	TCMSP	Cinnamomi Ramulus	MOL010548	β-Methoxystyrene	4519772	134.19	1.57	0	1	26.54	1.54	1.64	0.02	0.34
227	TCMSP	Persicae Semen	MOL001349	gibberellin A19	4573832	362.46	1.54	3	6	88.6	-0.75	-1.17	0.46	0.34	11.29
228	TCMSP	Persicae Semen	MOL001351	Gibberellin A44	4573921	346.46	1.89	2	5	101.61	-0.13	-0.48	0.54	0.32	11.8
229	TCMSP	Persicae Semen	MOL001348	Gibberellin 17	4574148	378.46	1.49	4	7	94.64	-0.87	-1.14	0.49	0.32	11.67
230	TCMSP	Poria Sclerotium	MOL000290	Poricoic acid A	4581934	498.77	5.94	3	5	30.61	-0.14	-0.93	0.76	0	8.26
231	TCMSP	Poria Sclerotium	MOL000291	Poricoic acid B	4581935	484.74	5.64	3	5	30.52	-0.08	-0.87	0.75	0	8.67
232	TCMSP	Poria Sclerotium	MOL000289	Pachymic acid	4588502	528.85	6.54	2	5	33.63	0.1	-0.57	0.81	0	9.27
233	TCMSP	Persicae Semen	MOL000256	Olein	4593733	885.61	20.93	0	6	27.27	0.97	-0.8	0.13	0.18
234	TCMSP	Cinnamomi Ramulus	MOL000249	Methylcinnamate	4612449	162.2	2.15	0	2	18.42	1.3	1.3	0.04	0.37
235	TCMSP	Cinnamomi Ramulus	MOL000357	Daucosterol (=Sitogluside=Alexandrin)	4674825	576.95	6.34	4	6	20.63	-0.14	-0.93	0.62	0.23
	TCMSP	Paeoniae Radix	MOL000357	Daucosterol (=Sitogluside=Alexandrin)	4674825	576.95	6.34	4	6	20.63	-0.14	-0.93	0.62	0.23
	TCMSP	Persicae Semen	MOL000295	Daucosterol (=Sitogluside=Alexandrin)	4674825	576.95	6.34	4	6	20.63	-0.2	-0.81	0.63	0
	TCMSP	Poria Sclerotium	MOL000295	Daucosterol (=Sitogluside=Alexandrin)	4674825	576.95	6.34	4	6	20.63	-0.2	-0.81	0.63	0
236	TCMSP	Cinnamomi Ramulus	MOL000018	(-)-Isoborneol	4882019	154.28	1.98	1	1	86.98	1.27	1.6	0.05	0	11.36
237	TCMSP	Persicae Semen	MOL001315	Campesterol-3-O-β-D-glucopyranoside	4884485	562.92	5.88	4	6	20.49	-0.22	-0.83	0.67	0.23
238	TCMSP	Persicae Semen	MOL001325	Campesterol-3-O-β-D-(6-O-palmityl)glucopyranoside	4884486	801.38	12.86	3	7	25.65	0.02	-1.13	0.19	0.2
239	TCMSP	Moutan Radicis Cortex	MOL001915	Kaempferol-3,7-di-O-beta-D-glucoside	4884845	610.57	-2.22	10	16	3.47	-2.71	-3.73	0.71	0.29
240	TCMSP	Moutan Radicis Cortex	MOL007375	β-Sitosterol-β-D-glucoside	4885203	578.97	6.59	4	6	19.58	-0.17	-0.83	0.62	0.22
241	Previous report	Moutan Radicis Cortex		Suffruticoside B	4885244
242	TCMSP	Cinnamomi Ramulus	MOL010563	Methyl (Z)-cinnamate	4933863	162.2	2.15	0	2	37.2	1.31	1.56	0.04	0.35	7.75
243	TCMSP	Cinnamomi Ramulus	MOL000250	cis-Cinnamaldehyde	4934372	132.17	1.95	0	1	27.21	1.33	1.45	0.02	0.47
244	TCMSP	Cinnamomi Ramulus	MOL010947	(Z)-Calamenene (=cis-Calamenene)	4934454	202.37	5.04	0	0	17.75	1.87	2.04	0.08	0.28
245	TCMSP	Cinnamomi Ramulus	MOL011148	Bergamotene (Z,.alpha.,cis)	4934675	204.39	4.7	0	0	18.43	1.86	1.96	0.09	0.26
246	TCMSP	Cinnamomi Ramulus	MOL000943	10-epi-g-Eudesmol	4936093	222.41	3.86	1	1	28.1	1.47	1.74	0.1	0.21
247	TCMSP	Cinnamomi Ramulus	MOL000612	(−)-α-Cedrene	4936353	204.39	4.12	0	0	55.56	1.81	2.16	0.1	0.24	4.82
248	TCMSP, profiling	Cinnamomi Ramulus	MOL003937	(+)-?-cadinene	4937651	204.39	4.8	0	0	20.21	1.87	2.06	0.08	0.26
249	TCMSP	Persicae Semen	MOL001317	β-Sitosterol 3-O-β-D-(6-O-oleyl)glucopyranoside	4942955	841.45	13.78	3	7	26.94	-0.02	-1.39	0.16	0.21
250	TCMSP	Persicae Semen	MOL001334	Benzyl β-gentiobioside	4955771	432.47	-2.27	7	11	3.46	-2.07	-2.76	0.56	0.31
251	TCMSP	Persicae Semen	MOL001331	Amygdalinic acid	4957595	476.48	-2.57	8	13	4.15	-2.32	-2.85	0.63	0.33
252	TCMSP	Cinnamomi Ramulus	MOL000908	β-elemene	5293588	204.39	4.79	0	0	25.63	1.84	2.07	0.06	0.33
253	TCMSP	Cinnamomi Ramulus	MOL002744	(R)-2-Methylbutyric acid	5323416	102.15	1.36	1	2	28.86	0.76	1.06	0.01	0.33
254	TCMSP	Cinnamomi Ramulus	MOL002834	Ethylcinnamate	5485128	176.23	2.5	0	2	20.54	1.3	1.25	0.04	0.39
255	TCMSP	Persicae Semen	MOL001336	(2S,3R,4S,5S,6R)-2-(Benzyloxy)-6-methylol-tetrahydropyran-3,4,5-triol	6225739	270.31	-0.52	4	6	17.14	-0.71	-0.95	0.14	0.32
256	TCMSP	Moutan Radicis Cortex	MOL007378	3-Acetyl-4-hydroxybenzoic acid	7468113	180.17	0.91	2	4	37.58	-0.04	-0.17	0.05	0.43	24.85
257	TCMSP	Persicae Semen	MOL001321	d-Mandelonitrile	7827597	133.16	1.2	1	2	48.26	0.67	0.57	0.02	0.47	-1.87
258	TCMSP, report	Poria Sclerotium	MOL000285	Polyporenic acid C	7981050	482.77	5.68	2	4	38.26	0.12	-0.57	0.82	0	6.77
259	TCMSP	Persicae Semen	MOL001368	3-O-p-Coumaroylquinic acid	8121397	338.34	-0.15	5	8	37.63	-1.2	-1.53	0.29	0.4	5.15
260	TCMSP, report	Poria Sclerotium	MOL000287	Eburicoic acid	8180526	470.81	7.33	2	3	38.7	0.61	-0.04	0.81	0	6.59
261	TCMSP	Persicae Semen	MOL001364	(2S)-2-Phenyl-2-[(2S,3R,4S,5S,6R)-3,4,5-trihydroxy-6-(hydroxymethyl)oxan-2-yl]oxyacetic acid	8301184	314.32	-0.82	5	8	8.27	-1.22	-1.5	0.2	0.32
262	TCMSP	Persicae Semen	MOL001319	3-Feruloylquinic acid	8309124	368.37	-0.16	5	9	19.31	-1.01	-1.49	0.36	0.32
263	TCMSP	Poria Sclerotium	MOL000279	Cerevisterol	8356635	430.74	5.15	3	3	37.96	0.28	-0.39	0.77	0	5.31
264	TCMSP	Poria Sclerotium	MOL000281	Dimethyl L-malate	8461284	162.16	-0.45	1	5	8.59	-0.05	-0.61	0.03	0
265	TCMSP	Paeoniae Radix	MOL006179	2-(6-Carboxy-2,3,4-trihydroxyphenyl)-3,4,5-trihydroxybenzoic acid	8490515	338.24	0.95	8	10	15.21	-0.77	-1.26	0.27	0
266	TCMSP	Paeoniae Radix	MOL001935	(3aR,6S,7aR)-6-Hydroxy-6-methyl-3-methylene-3a,4,7,7a-tetrahydrobenzofuran-2,5-dione	8550865	196.22	-0.1	1	4	97.79	-0.01	-0.13	0.08	0.39	13.98
267	TCMSP	Cinnamomi Ramulus	MOL001599	α-Cubebol	8574094	208.38	3.28	1	1	64.81	1.32	1.43	0.09	0.26	7.24
268	TCMSP	Paeoniae Radix	MOL006990	(1S,2S,4R)-trans-2-Hydroxy-1,8-cineole-B-D-glucopyranoside	9029318	332.44	-0.57	4	7	30.25	-0.77	-1.14	0.27	0.25	0.98
269	TCMSP	Cinnamomi Ramulus	MOL004717	α-selinene	9031905	204.39	4.75	0	0	23.86	1.84	2.05	0.08	0.27
270	TCMSP	Cinnamomi Ramulus	MOL001179	(−)-Alloaromadendrene	9075000	204.39	4.22	0	0	54.04	1.81	2.07	0.1	0.23	12.06
271	TCMSP	Cinnamomi Ramulus	MOL006316	10-Epizonarene	9162580	204.39	4.94	0	0	16.04	1.85	2	0.08	0.24
272	TCMSP	Cinnamomi Ramulus	MOL002024	(-)-Bornylene	9237642	136.26	2.63	0	0	39.62	1.8	2.21	0.04	0.25	11.28
273	TCMSP	Cinnamomi Ramulus	MOL000208	Aromadendrene	9270876	204.39	4.22	0	0	55.74	1.81	2.06	0.1	0.26	11.84
274	TCMSP	Poria Sclerotium	MOL000304	Ethyl glucoside	9302607	208.24	-1.76	4	6	15.21	-1.03	-3.15	0.06	0
275	TCMSP	Cinnamomi Ramulus	MOL010120	(-)-Cubenol	9944745	222.41	3.91	1	1	62.54	1.49	1.65	0.09	0.24	5.48
276	TCMSP	Cinnamomi Ramulus	MOL012344	a-Himachalene	10005198	204.39	4.75	0	0	46.05	1.82	2.19	0.08	0.26	5.67
277	TCMSP	Moutan Radicis Cortex	MOL001925	Paeoniflorin_qt	10146692	318.35	0.46	2	6	68.18	-0.34	-0.73	0.4	0.39	8.81
	TCMSP	Paeoniae Radix	MOL001925	Paeoniflorin_qt	10146692	318.35	0.46	2	6	68.18	-0.34	-0.73	0.4	0.39	8.81
278	TCMSP	Paeoniae Radix	MOL007024	Galloylpaeoniflorine_qt 2	10146692	318.35	0.46	2	6	28.18	-0.34	-0.72	0.4	0.39
279	TCMSP	Cinnamomi Ramulus	MOL000340	3-Phenylpropanoic acid (=Hydrocinnamic acid)	10181339	150.19	1.93	1	2	35.83	0.92	0.99	0.03	0.42	5.68
280	TCMSP	Poria Sclerotium	MOL000275	Trametenolic acid	10193870	456.78	7.03	2	3	38.71	0.52	-0.14	0.8	0	7.78
281	TCMSP	Cinnamomi Ramulus	MOL001123	Muurolene	10209840	204.39	4.75	0	0	19.5	1.84	2.16	0.08	0.25
282	TCMSP	Cinnamomi Ramulus	MOL006287	α-Muurolene	10209840	204.39	4.75	0	0	15.64	1.84	2.11	0.08	0.25
283	TCMSP	Cinnamomi Ramulus	MOL011899	Eremophilene	10212000	204.39	4.75	0	0	34.6	1.85	2.06	0.08	0.28	7.29
284	TCMSP	Persicae Semen	MOL001347	GA16	10222079	348.43	0.58	3	6	14.26	-0.63	-0.93	0.53	0.31
285	TCMSP	Persicae Semen	MOL001350	GA30	10222080	346.41	0.33	3	6	61.72	-0.83	-1.3	0.54	0.35	8.74
286	TCMSP	Cinnamomi Ramulus	MOL002502	Copaene	10231594	204.39	4.17	0	0	24.08	1.81	2.06	0.12	0.23
287	TCMSP	Moutan Radicis Cortex	MOL007380	Mudanpinoic acid A	10237062	454.76	5.85	2	3	13.86	0.6	-0.03	0.65	0.26
288	TCMSP	Moutan Radicis Cortex	MOL007379	mudanoside B	10237063	464.42	-2.68	9	14	5.6	-2.54	-3.07	0.63	0.29
289	TCMSP	Cinnamomi Ramulus	MOL001201	(1R,5R,7S)-4,7-Dimethyl-7-(4-methylpent-3-enyl)bicyclo[3.1.1]hept-3-ene	10250932	204.39	4.7	0	0	16.23	1.86	1.96	0.09	0.27
290	Previous report	Moutan Radicis Cortex		Mudanpioside C	10260957
291	TCMSP, report	Moutan Radicis Cortex	MOL007006	Oxypaeoniflorin	10260964	496.51	-1.55	6	12	12.98	-1.91	-2.7	0.78	0.34
	TCMSP	Paeoniae Radix	MOL007006	Oxypaeoniflorin	10260964	496.51	-1.55	6	12	12.98	-1.91	-2.7	0.78	0.34
292	TCMSP	Moutan Radicis Cortex	MOL007003	Benzoyl paeoniflorin	10260965	584.62	0.76	4	12	31.14	-1.35	-2.08	0.54	0.4	15.66
	TCMSP	Paeoniae Radix	MOL007003	Benzoyl paeoniflorin	10260965	584.62	0.76	4	12	31.14	-1.35	-2.08	0.54	0.4	15.66
293	TCMSP	Paeoniae Radix	MOL007025	Isobenzoylpaeoniflorin	10260965	584.62	0.76	4	12	31.14	-0.85	-1.33	0.54	0.35	21.1
294	TCMSP	Cinnamomi Ramulus	MOL001301	cis-Zimtsaeure	10286933	148.17	1.9	1	2	38.19	0.91	1.09	0.03	0.41	6.4
295	TCMSP	Paeoniae Radix	MOL006997	2-[(2R,5R,6R)-6,10-Dimethylspiro[4.5]dec-9-en-2-yl]propan-2-ol	10288053	222.41	3.67	1	1	18.44	1.33	1.44	0.09	0.26
296	TCMSP	Cinnamomi Ramulus	MOL000025	α-Longipinene	10308534	204.39	4.12	0	0	53.26	1.83	2.14	0.12	0	12.06
297	TCMSP	Persicae Semen	MOL001367	[(2S,3R,4S,5S,6R)-3,4,5-Trihydroxy-6-(hydroxymethyl)oxan-2-yl] (E)-3-(4-hydroxyphenyl)prop-2-enoate	10394547	326.33	-0.27	5	8	9.8	-1.09	-1.71	0.26	0.35
298	TCMSP	Moutan Radicis Cortex	MOL000098	Quercetin	12269344	302.25	1.5	5	7	46.43	0.05	-0.77	0.28	0.38	14.4
299	TCMSP	Paeoniae Radix	MOL006995	1-o-beta-d-Glucopyranosylpaeonisuffrone	13115458	494.54	-1.24	4	11	26.62	-1.15	-1.66	0.78	0.29
300	TCMSP	Paeoniae Radix	MOL000971	Ethylpalmitate	13360597	284.54	6.97	0	2	18.99	1.41	1.15	0.14	0.16
301	TCMSP	Paeoniae Radix	MOL002850	Butylated hydroxytoluene	13835296	220.39	4.85	1	1	40.02	1.75	1.8	0.07	0.3	10.36
302	TCMSP	Paeoniae Radix	MOL000106	Pyrogallol	13835557	126.12	1.03	3	3	22.98	0.69	0.79	0.02	0.4
303	TCMSP	Cinnamomi Ramulus	MOL004479	o-Cresol	13835772	108.15	2.05	1	1	62.45	1.57	1.9	0.02	0.4	11.96
304	TCMSP	Cinnamomi Ramulus	MOL002095	Diethyl benzene-1,2-dicarboxylate	13837303	222.26	2.24	0	4	52.19	0.72	0.57	0.07	0.38	5.37
	TCMSP	Moutan Radicis Cortex	MOL002095	Diethyl benzene-1,2-dicarboxylate	13837303	222.26	2.24	0	4	52.19	0.72	0.57	0.07	0.38	5.37
305	TCMSP	Cinnamomi Ramulus	MOL000676	Dibutyl benzene-1,2-dicarboxylate	13837319	278.38	4.2	0	4	64.54	0.8	0.56	0.13	0.34	5.41
306	TCMSP	Cinnamomi Ramulus	MOL000057	di-l-butyl phthalate(=Dibutyl benzene-1,2-dicarboxylate)	13837319	278.38	3.92	0	4	49.63	0.85	0.68	0.13	0	3.94
307	TCMSP	Cinnamomi Ramulus	MOL000199	Safrol	13848731	162.2	2.61	0	2	45.34	1.44	1.29	0.05	0.38	5
308	TCMSP, report	Cinnamomi Ramulus	MOL000431	Coumarin	13848793	146.15	1.9	0	2	29.17	1.2	1.3	0.04	0
309	TCMSP	Moutan Radicis Cortex	MOL000719	Methyl salicylate	13848808	152.16	1.42	1	3	42.55	1.05	1.1	0.03	0.36	-2.17
310	TCMSP	Cinnamomi Ramulus	MOL000123	Geraniol	13849989	154.28	2.93	1	1	23.93	1.19	1.14	0.02	0.27
311	TCMSP	Cinnamomi Ramulus	MOL003785	Benzyl acetate	13850405	150.19	1.61	0	2	20.79	1.24	1.46	0.03	0.35
312	TCMSP	Cinnamomi Ramulus	MOL003032	Phenylmethyl benzoate	13856959	212.26	3.27	0	2	18.64	1.36	1.18	0.09	0.47
	TCMSP	Paeoniae Radix	MOL003032	Phenylmethyl benzoate	13856959	212.26	3.27	0	2	18.64	1.36	1.18	0.09	0.47
313	TCMSP	Persicae Semen	MOL001335	phenylmethanol (=Benzul alcohol)	13860335	108.15	1.23	1	1	58.68	1.08	1.27	0.01	0.38	11.87
314	TCMSP	Cinnamomi Ramulus	MOL010564	2-Hydroxybenzaldehyde	13863618	122.13	1.32	1	2	32.1	0.89	0.87	0.02	0.42	12.07
	TCMSP	Paeoniae Radix	MOL010564	2-Hydroxybenzaldehyde	13863618	122.13	1.32	1	2	32.1	0.89	0.87	0.02	0.42	12.07
315	TCMSP	Paeoniae Radix	MOL000172	Furol	13863629	96.09	0.99	0	2	34.35	1.08	1.51	0.01	0.2	4.53
316	TCMSP	Cinnamomi Ramulus	MOL003504	Tolualdehydes	13865424	120.16	2.08	0	1	44.18	1.39	1.59	0.02	0.41	11.82
317	TCMSP	Cinnamomi Ramulus	MOL003524	Benzenepropanol	13871718	136.21	2	1	1	36.57	1.18	1.15	0.02	0.33	4.09
318	TCMSP	Cinnamomi Ramulus	MOL000254	Eugenol	13876103	164.22	2.55	1	2	56.24	1.35	1.32	0.04	0.32	0.92
	TCMSP	Moutan Radicis Cortex	MOL000254	Eugenol	13876103	164.22	2.55	1	2	56.24	1.35	1.32	0.04	0.32	0.92
	TCMSP	Paeoniae Radix	MOL000254	Eugenol	13876103	164.22	2.55	1	2	56.24	1.35	1.32	0.04	0.32	0.92
319	TCMSP	Cinnamomi Ramulus	MOL000714	Hyacinthin	13876539	120.16	1.52	0	1	38.65	1.31	1.58	0.02	0.43	-2.04
320	TCMSP	Cinnamomi Ramulus	MOL003393	Guaiene	16736689	204.39	5.13	0	0	24.38	1.86	2.07	0.07	0.23
321	TCMSP	Cinnamomi Ramulus	MOL000615	δ-Amorphene	16737050	204.39	4.94	0	0	17.95	1.85	1.99	0.08	0.24
322	TCMSP	Cinnamomi Ramulus	MOL000037	γ-Elemene	16737080	204.39	4.93	0	0	23.79	1.87	2.1	0.06	0
323	TCMSP	Cinnamomi Ramulus	MOL003126	α-cadinene	16737087	204.39	4.75	0	0	18.73	1.85	2.05	0.08	0
324	TCMSP	Cinnamomi Ramulus	MOL003541	(+)-α-longipinene	17345151	204.39	4.12	0	0	57.47	1.81	2.05	0.12	0	12.13
325	TCMSP	Persicae Semen	MOL001345	Methyl-α-D-fructofuranoside	19982077	194.21	-2.15	4	6	65.63	-1.09	-3.27	0.05	0.19	11.03
326	TCMSP	Poria Sclerotium	MOL000280	(2R)-2-[(3S,5R,10S,13R,14R,16R,17R)-3,16-Dihydroxy-4,4,10,13,14-pentamethyl-2,3,5,6,12,15,16,17-octahydro-1H-cyclopenta[a]phenanthren-17-yl]-5-isopropyl-hex-5-enoic acid	19999503	484.79	5.72	3	4	31.07	0.05	-0.7	0.82	0	7.42
327	TCMSP	Moutan Radicis Cortex	MOL000095	stigmast-7-enol	20099906	416.81	8.33	1	1	25.32	1.31	0.98	0.75	0.21
328	TCMSP	Paeoniae Radix	MOL006999	Stigmast-7-en-3-ol	20099907	414.79	8.08	1	1	37.42	1.32	0.85	0.75	0.22	5.85
329	TCMSP	Cinnamomi Ramulus	MOL010549	m-Formylphenol	21105795	122.13	1.32	1	2	30.97	0.83	0.72	0.02	0.43	12.01
330	TCMSP	Cinnamomi Ramulus	MOL002839	Chavicol	21105856	134.19	2.57	1	1	44.19	1.6	1.76	0.02	0.45	-2.42
331	TCMSP	Cinnamomi Ramulus	MOL000259	o-Thymol	21105867	150.24	3.24	1	1	43.28	1.58	1.71	0.03	0.33	11.29
332	TCMSP	Cinnamomi Ramulus	MOL002225	Styrone	21105870	134.19	1.69	1	1	38.35	1.14	1.09	0.02	0.41	4.38
333	TCMSP	Cinnamomi Ramulus	MOL005610	1-(2-Hydroxyphenyl)ethanone	21105920	136.16	1.3	1	2	24.15	1.12	1.26	0.03	0.43
	TCMSP	Paeoniae Radix	MOL005610	1-(2-Hydroxyphenyl)ethanone	21105920	136.16	1.3	1	2	24.15	1.12	1.26	0.03	0.43
334	TCMSP	Cinnamomi Ramulus	MOL002836	Anisaldehyde	21105937	136.16	1.57	0	2	21.54	1.12	1.15	0.02	0.33
335	TCMSP	Cinnamomi Ramulus	MOL011428	Phenethyl acetate	21105987	164.22	1.93	0	2	22.99	1.24	1.3	0.04	0.33
336	TCMSP	Cinnamomi Ramulus	MOL002042	Thymol	21105998	150.24	3.24	1	1	41.47	1.6	1.68	0.03	0.33	11.33
337	TCMSP	Cinnamomi Ramulus	MOL000207	Methyleugenol	21106140	178.25	2.81	0	2	73.36	1.47	1.41	0.04	0.27	2.92
338	TCMSP	Cinnamomi Ramulus	MOL000974	Cuminal	21106431	148.22	2.78	0	1	38.29	1.39	1.61	0.03	0.36	1.94
339	TCMSP	Moutan Radicis Cortex	MOL002786	Apocynin	21106900	166.19	1.29	1	3	31.71	0.74	0.52	0.04	0.33	24.75
340	TCMSP	Cinnamomi Ramulus	MOL002888	o-Anisaldehyde	21111781	136.16	1.57	0	2	57.94	1.06	1.18	0.03	0.34	11.97
341	TCMSP	Cinnamomi Ramulus	MOL001237	o-Acetyltoluene	21169901	134.19	2.06	0	1	38.96	1.47	1.66	0.02	0.43	25.18
342	TCMSP	Cinnamomi Ramulus	MOL010380	(+)-α-Funebrene	21170410	204.39	4.12	0	0	49.41	1.81	2.13	0.1	0.24	5.06
343	TCMSP	Paeoniae Radix	MOL009569	4,7-Dimethylbenzofuran	21173254	146.2	3.11	0	1	55.66	1.8	1.82	0.04	0.26	5.88
344	TCMSP	Cinnamomi Ramulus	MOL003521	Isohomogenol	21242881	178.25	2.75	0	2	32.61	1.49	1.33	0.04	0.28	2.73
345	TCMSP	Persicae Semen	MOL001330	2,3-Didehydro GA9	21864943	314.41	2.33	1	4	17.03	0.37	0.07	0.45	0.35
346	TCMSP	Cinnamomi Ramulus	MOL000933	γ-bisabolene	21865660	204.39	5.47	0	0	20.78	1.94	1.98	0.06	0.28
347	TCMSP	Cinnamomi Ramulus	MOL000980	(Z)-?-bisabolene	21865664	204.39	5.28	0	0	28.62	1.88	2.01	0.06	0.28
348	TCMSP	Cinnamomi Ramulus	MOL000914	(+)-α-thujene	21865693	136.26	2.87	0	0	47.13	1.81	2.14	0.04	0.29	11.44
349	TCMSP	Persicae Semen	MOL001370	[2-[(2S,3R,4S,5S,6R)-3,4,5-Trihydroxy-6-(hydroxymethyl)oxan-2-yl]oxyphenyl]methyl (E)-3-(3,4-dihydroxyphenyl)prop-2-enoate	22913007	448.46	1.03	6	10	8.22	-1.05	-1.7	0.69	0.33
350	TCMSP	Poria Sclerotium	MOL000284	L-Uridine	24600266	244.23	-2.45	4	8	23.4	-1.07	-1.42	0.11	0
351	TCMSP	Paeoniae Radix	MOL007030	Paeonin,c	24625087	372.41	-1.18	4	9	10.26	-1.21	-1.71	0.36	0.29
352	TCMSP	Paeoniae Radix	MOL007026	Paeonin,a	24627372	372.41	-2.06	4	9	20.35	-1.32	-1.76	0.37	0.27
353	TCMSP	Poria Sclerotium	MOL000294	poricoic acid DM	24655787	528.8	4.98	3	6	29.32	-0.34	-0.94	0.78	0
354	TCMSP	Paeoniae Radix	MOL006996	1-o-beta-d-Glucopyranosylpaeonisuffrone_qt	24661457	332.38	0.51	1	6	65.08	-0.05	-0.49	0.35	0.38	7.19
355	TCMSP	Moutan Radicis Cortex	MOL007383	Paeonidanin	24674496	492.57	-0.83	4	10	24.64	-1.28	-1.71	0.78	0.3
356	TCMSP	Persicae Semen	MOL001363	GA97	24808120	364.48	1.14	4	6	10.12	-0.89	-1.32	0.47	0.32
357	TCMSP	Persicae Semen	MOL001333	7-Dehydroavenasterol	24850097	412.77	7.83	1	1	10.03	1.36	1	0.76	0.23
358	TCMSP	Moutan Radicis Cortex	MOL002215	Oleanic acid	25948786	440.78	7.52	1	2	8.41	1.14	0.97	0.77	0.25
359	TCMSP	Poria Sclerotium	MOL000292	poricoic acid C	26639252	482.77	7.11	2	4	38.15	0.32	-0.41	0.75	0	7.73
360	Previous report	Moutan Radicis Cortex		Hexagalloylglucose	26949161
	Previous report	Paeoniae Radix		Hexagalloylglucose	26949161
361	TCMSP	Paeoniae Radix	MOL007000	2-Methoxy-5-(e)-propenyl-phenol-beta-vicianoside	28283755	458.51	-0.64	6	11	4.38	-1.45	-1.79	0.65	0.25
362	TCMSP	Moutan Radicis Cortex	MOL007368	4-O-Methylpaeoniflorin	28284134	494.54	-0.87	4	11	25.71	-1.27	-1.7	0.78	0.3
	TCMSP	Paeoniae Radix	MOL007368	4-O-Methylpaeoniflorin	28284134	494.54	-0.87	4	11	25.71	-1.27	-1.7	0.78	0.3
363	TCMSP	Paeoniae Radix	MOL007009	4-o-Galloylalbiflorin	28286868	632.62	-0.09	7	15	3.09	-1.66	-2.45	0.61	0.36
364	TCMSP	Cinnamomi Ramulus	MOL012644	Caryophellene	28473589	204.39	4.75	0	0	23.79	1.84	2.08	0.09	0.28
365	TCMSP, report	Moutan Radicis Cortex	MOL007381	Mudanpioside H	28645382	618.64	0	6	14	6.77	-1.63	-2.6	0.61	0.33
366	Previous report	Poria Sclerotium	MOL000274	Dehydrotrametenolic acid	28646630	454.73	6.85	2	3	24.92	0.53	-0.24	0.8	0
367	TCMSP	Poria Sclerotium	MOL000274	3β-Hydroxylanosta-7,9(11),24-trien-21-oic acid	28646630	454.76	6.58	2	3	24.92	0.53	-0.24	0.8	0
368	TCMSP, report, profiling	Paeoniae Radix	MOL007004	Albiflorin	29273167	480.51	-1.33	5	11	30.25	-1.52	-2.33	0.77	0.35	7.83
369	TCMSP	Paeoniae Radix	MOL007016	Paeoniflorigenone	30790852	318.35	0.79	1	6	65.33	-0.13	-0.43	0.37	0.36	6.18
370	TCMSP	Poria Sclerotium	MOL000293	poricoic acid D	32762856	514.77	4.73	4	6	22.38	-0.62	-1.29	0.78	0
371	TCMSP	Cinnamomi Ramulus	MOL005472	1,2-Benzenedicarboxylicacid, mono(2-ethyl) hexylester	32809703	278.38	4.31	1	4	55.17	0.57	0.35	0.13	0.35	4.94
372	TCMSP	Persicae Semen	MOL001354	GA61	35013810	332.43	1.81	2	5	14.82	-0.22	-0.45	0.49	0.32
373	TCMSP	Persicae Semen	MOL001353	GA60	35013811	348.43	0.73	3	6	93.17	-0.79	-1.48	0.53	0.33	7.9
374	TCMSP	Persicae Semen	MOL001355	GA63	35013823	348.43	0.71	3	6	65.54	-0.57	-0.73	0.54	0.33	9.85
375	TCMSP	Persicae Semen	MOL001352	GA54	35013827	348.43	0.58	3	6	64.21	-0.5	-0.64	0.53	0.31	10.19
376	TCMSP	Persicae Semen	MOL001360	GA77	35014344	348.43	0.73	3	6	87.89	-0.64	-1.11	0.53	0.34	7.28
377	TCMSP	Persicae Semen	MOL001340	GA120	35014496	314.41	2.47	1	4	84.85	0.38	0.1	0.45	0.35	8.4
378	TCMSP	Persicae Semen	MOL001357	GA69	35014497	332.43	1.61	2	5	17.67	-0.21	-0.73	0.49	0.32
379	TCMSP	Persicae Semen	MOL001359	GA70	35014497	332.43	1.61	2	5	14.04	-0.23	-0.78	0.49	0.33
380	TCMSP	Persicae Semen	MOL001341	GA121	35014498	330.41	1.3	2	5	14.13	-0.26	-0.84	0.5	0.35
381	TCMSP	Persicae Semen	MOL001346	GA126	35014545	346.41	0.42	3	6	11.8	-0.64	-1.1	0.53	0.37
382	TCMSP	Persicae Semen	MOL001361	GA87	35014764	362.41	-0.55	4	7	68.85	-1.14	-1.7	0.57	0.37	8.76
383	TCMSP	Paeoniae Radix	MOL007022	EvofolinB	35293813	318.35	2.07	3	6	64.74	0	-0.66	0.22	0.29	17.01
384	Previous report, profiling	Paeoniae Radix	MOL007025	Benzoylpaeoniflorin	46882878	584.62	0.76	4	12	31.14	-1.35	-2.08	0.54	0.4	15.66
385	Previous report	Moutan Radicis Cortex		Benzoyloxypaeoniflorin	46883190
386	TCMSP	Poria Sclerotium	MOL000276	7,9(11)-Dehydropachymic acid	57256982	526.83	6.1	2	5	35.11	0.03	-0.87	0.81	0	7.34
387	TCMSP, report	Paeoniae Radix	MOL001921	Lactiflorin	58827443	462.49	-0.57	3	10	49.12	-1.13	-1.76	0.8	0.34	7.26
388	TCMSP	Moutan Radicis Cortex	MOL007376	β-Sitosterol-β-D-glucoside_qt	62987905	416.81	8.33	1	1	25.32	1.28	0.99	0.75	0.21
389	TCMSP	Paeoniae Radix	MOL007028	Paeonin,b	65322541	358.38	-2.47	5	9	17.29	-1.76	-2.51	0.34	0.3
390	TCMSP	Persicae Semen	MOL001339	GA119	65998499	332.43	1.81	2	5	76.36	-0.12	-0.48	0.49	0.32	8.35
391	Previous report	Moutan Radicis Cortex	MOL009093	Tetragalloylglucose	66738416	788.62	2.45	13	22	3.01	-2.26	-3.56	0.33	0.38
	Previous report	Paeoniae Radix	MOL009093	Tetragalloylglucose	66738416	788.62	2.45	13	22	3.01	-2.26	-3.56	0.33	0.38
392	TCMSP	Persicae Semen	MOL001373	Salireposide_qt	76762608	244.26	2.73	2	4	24.3	0.63	0.02	0.12	0.44
393	TCMSP	Poria Sclerotium	MOL000300	Dehydroeburicoic acid		453.75	6.35	1	3	44.17	0.38	-0.16	0.83	0.04	7.04
394	TCMSP	Persicae Semen	MOL001344	GA122-isolactone		330.41	1.34	2	5	88.11	-0.18	-0.65	0.54	0.32	7.4
395	TCMSP	Persicae Semen	MOL001342	GA121-isolactone		330.41	1.34	2	5	72.7	-0.26	-0.75	0.54	0.34	7.63
396	TCMSP	Persicae Semen	MOL001329	2,3-Didehydro GA77		346.41	0.28	3	6	88.08	-0.67	-1.1	0.53	0.37	7.6
397	TCMSP	Persicae Semen	MOL001343	GA122		330.41	1.3	2	5	64.79	-0.17	-0.73	0.5	0.34	7.01
398	TCMSP	Persicae Semen	MOL001328	2,3-Didehydro GA70		330.41	1.16	2	5	63.29	-0.27	-0.84	0.5	0.36	7.62
399	TCMSP	Paeoniae Radix	MOL007008	4-Ethyl-paeoniflorin_qt		332.38	1.02	1	6	56.87	-0.17	-0.52	0.44	0.35	8.88
400	TCMSP	Moutan Radicis Cortex	MOL007369	4-O-Methylpaeoniflorin_qt		332.38	0.87	1	6	67.24	0.15	-0.15	0.43	0.34	9.51
	TCMSP	Paeoniae Radix	MOL007369	4-O-Methylpaeoniflorin_qt		332.38	0.87	1	6	67.24	0.15	-0.15	0.43	0.34	9.51
401	TCMSP	Moutan Radicis Cortex	MOL007382	Mudanpioside-H_qt 2		336.37	-0.03	3	7	42.36	-0.39	-0.96	0.37	0.32	7.6
402	TCMSP	Moutan Radicis Cortex	MOL007384	Paeonidanin_qt		330.41	0.92	1	5	65.31	-0.09	-0.59	0.35	0.35	7.1
403	TCMSP	Paeoniae Radix	MOL007005	Albiflorin_qt		318.35	0.42	2	6	48.7	-0.38	-0.75	0.33	0.41	5.91
404	TCMSP	Paeoniae Radix	MOL007018	9-Ethyl-neo-paeoniaflorin A_qt		334.4	1.48	1	6	64.42	-0.01	-0.32	0.3	0.35	2.08
405	TCMSP	Paeoniae Radix	MOL006992	(2R,3R)-4-Methoxyl-distylin		318.3	1.89	4	7	59.98	0.17	-0.61	0.3	0.33	15.08
406	TCMSP	Moutan Radicis Cortex	MOL007374	5-[[5-(4-Methoxyphenyl)-2-furyl]methylene]barbituric acid		312.3	2.05	2	7	43.44	0.09	-0.7	0.3	0.29	2.59
407	TCMSP	Paeoniae Radix	MOL006994	1-o-beta-d-Glucopyranosyl-8-o-benzoylpaeonisuffrone_qt		302.35	0.44	1	5	36.01	-0.03	-0.47	0.3	0.41	5.98
408	TCMSP	Persicae Semen	MOL001371	Populoside_qt		286.3	2.94	3	5	108.89	0.49	-0.42	0.2	0.42	5.86
409	TCMSP	Paeoniae Radix	MOL007015	8-Debenzoylpaeonidanin_qt		228.27	-1.53	2	5	129.3	-0.55	-0.79	0.15	0.27	14.26
410	TCMSP	Paeoniae Radix	MOL007027	Paeonin,a_qt		210.25	-0.31	1	4	73.79	0.16	-0.03	0.09	0.23	1.01
411	TCMSP	Paeoniae Radix	MOL007031	Paeonin,c_qt		210.25	0.57	1	4	72.7	0.14	-0.18	0.09	0.32	8.47
412	TCMSP	Cinnamomi Ramulus	MOL000942	(1R,4S,4aR,8aR)-4-Isopropyl-1,6-dimethyl-3,4,4a,7,8,8a-hexahydro-2H-naphthalen-1-ol		222.41	3.78	1	1	31.67	1.32	1.3	0.09	0.24	6.87
413	TCMSP	Paeoniae Radix	MOL007029	Paeonin,b_qt		196.22	-0.72	2	4	105.45	-0.33	-0.64	0.08	0.28	2.27
414	TCMSP	Persicae Semen	MOL001324	Campesterol-3-O-β-D-(6-O-oleyl)glucopyranoside		827.42	13.33	3	7	27.03	0.04	-1.3	0.17	0.21
415	TCMSP	Moutan Radicis Cortex	MOL007366	Galloyl-oxypaeoniflorin_qt 2		334.35	0.2	3	7	26.21	-0.54	-0.97	0.44	0.39
416	TCMSP	Persicae Semen	MOL001318	β-Sitosterol-3-(6-palmitoyl)glucopyranoside		815.41	13.5	3	7	26.07	0.1	-1.08	0.18	0.2
417	TCMSP	Paeoniae Radix	MOL007007	4-Ethyl-paeoniflorin		494.54	-0.73	4	11	24.81	-0.94	-1.27	0.82	0.31
418	TCMSP	Paeoniae Radix	MOL007017	9-Ethyl-neo-paeoniaflorin A		496.56	-0.27	4	11	23.64	-1.26	-1.5	0.68	0.32
419	TCMSP	Cinnamomi Ramulus	MOL004727	(1R,4aR,8aS)-1-Isopropyl-7-methyl-4-methylene-2,3,4a,5,6,8a-hexahydro-1H-naphthalene		204.39	4.8	0	0	21.35	1.84	2.1	0.08	0.27
420	TCMSP	Cinnamomi Ramulus	MOL010544	1,10,14-Trimethyl-2-pentadecanone		268.54	6.61	0	1	21.13	1.49	1.36	0.1	0.2
421	TCMSP	Paeoniae Radix	MOL007020	Lactiflorin_qt		318.35	0.42	2	6	20.44	-0.42	-0.78	0.33	0.39
422	TCMSP	Moutan Radicis Cortex	MOL005090	Oxypaeoniflorin_qt		334.35	0.2	3	7	19.4	-0.77	-1.28	0.44	0.39
	TCMSP	Paeoniae Radix	MOL005090	Oxypaeoniflorin_qt		334.35	0.2	3	7	19.4	-0.77	-1.28	0.44	0.39
423	TCMSP	Moutan Radicis Cortex	MOL007371	6-o-Vanillyoxypaeoniflorin_qt 2		336.37	-0.03	3	7	17.71	-0.61	-1.19	0.37	0.32
424	TCMSP	Persicae Semen	MOL001327	2,3-Didehydro GA69		330.41	1.16	2	5	14.28	-0.17	-0.59	0.5	0.33
425	TCMSP	Moutan Radicis Cortex	MOL007377	Mudanoside A		342.33	-1	5	9	13.39	-1.42	-1.67	0.29	0.37
426	TCMSP	Paeoniae Radix	MOL006993	1-o-beta-d-Glucopyranosyl-8-o-benzoylpaeonisuffrone		464.51	-1.31	4	10	12.62	-1.05	-1.54	0.77	0.34
427	TCMSP	Moutan Radicis Cortex	MOL007370	6-o-Vanillyoxypaeoniflorin		648.67	-0.01	6	15	10.91	-1.58	-2.56	0.54	0.3
428	TCMSP	Persicae Semen	MOL001338	GA118		348.43	0.73	3	6	10.41	-0.6	-1.1	0.53	0.33
429	TCMSP	Paeoniae Radix	MOL007010	4-o-Galloylalbiflorin_qt		470.46	1.66	4	10	2.14	-0.62	-1.19	0.8	0.44
430	TCMSP	Poria Sclerotium	MOL000288	Pachyman		500.56	-4.27	9	14	0.45	-2.36	-3.58	0.68	0
431	Previous report	Moutan Radicis Cortex		Benzoylalbiflorin
	Previous report	Paeoniae Radix		Benzoylalbiflorin
432	profiling	GBH methanol extract	MOL008162	cyclosativene	453542	204.39	3.59	0	0	38.18	1.79	2.04	0.15	0.22	15.1
433	profiling		MOL007510	α-copaene	10231594	206.41	4.95	0	0	37.81	1.83	2.04	0.08	0.22	3.78
434	profiling			Isopropyl-4,7-dimethyl-1,2,4a,5,6,8a-hexahydronaphthalene
435	profiling			α-muurolol	2341398
436	profiling			4-isopropyl-1,6-dimethyl-1,2,3,4,4a,7-hexahydronaphthalene
437	profiling			11-oxatetacyclo[5.3.2.0(2,7).0(2,8)dodecane-9one

## Sheet: Suppl_Tabel 2
Table S2. All genes related active compounds through ADME screening based on STITCH database
Genes	Chemicals	confidence_score
A1BG	quercetin	0.15
A1CF	quercetin	0.15
AADAC	catechin	0.153
AADACL2	catechin	0.153
AADACL3	catechin	0.153
AADACL4	catechin	0.153
AADAT	quercetin	0.15
AAED1	quercetin	0.15
AASS	quercetin	0.15
ABCA1	campesterol	0.344
ABCA1	sitosterol	0.614
ABCA1	stigmasterol	0.88
ABCA10	quercetin	0.186
ABCA12	quercetin	0.287
ABCA13	quercetin	0.186
ABCA2	quercetin	0.186
ABCA3	quercetin	0.186
ABCA4	quercetin	0.186
ABCA5	quercetin	0.287
ABCA6	quercetin	0.186
ABCA7	quercetin	0.287
ABCA8	quercetin	0.186
ABCA9	quercetin	0.186
ABCB1	catechin	0.8
ABCB1	kaempferol	0.752
ABCB1	quercetin	0.953
ABCB11	sitosterol	0.815
ABCB4	quercetin	0.15
ABCB6	quercetin	0.173
ABCB7	quercetin	0.173
ABCC1	baicalein	0.7
ABCC1	kaempferol	0.725
ABCC1	paeonol	0.164
ABCC1	quercetin	0.75
ABCC1	taxifolin	0.7
ABCC3	cinnamaldehyde	0.15
ABCC3	paeonol	0.164
ABCC4	quercetin	0.7
ABCC5	quercetin	0.7
ABCC6	paeonol	0.164
ABCC6	quercetin	0.15
ABCD3	quercetin	0.15
ABCF2	taxifolin	0.223
ABCF3	taxifolin	0.223
ABCG1	quercetin	0.186
ABCG1	sitosterol	0.529
ABCG1	stigmasterol	0.307
ABCG2	catechin	0.221
ABCG2	kaempferol	0.235
ABCG2	quercetin	0.662
ABCG4	quercetin	0.186
ABCG5	campesterol	0.686
ABCG5	quercetin	0.287
ABCG5	sitosterol	0.879
ABCG5	stigmasterol	0.711
ABCG8	campesterol	0.879
ABCG8	quercetin	0.287
ABCG8	sitosterol	0.92
ABCG8	stigmasterol	0.811
ABHD12B	cinnamaldehyde	0.15
ABHD14B	quercetin	0.25
ABHD16A	hederagenin	0.265
ABHD4	quercetin	0.25
ABHD6	quercetin	0.15
ABL1	quercetin	0.505
ABL2	quercetin	0.505
ABLIM3	quercetin	0.15
ABP1	cinnamaldehyde	0.186
ACAA2	quercetin	0.15
ACACA	quercetin	0.7
ACAD11	quercetin	0.15
ACAD8	ethyl oleate	0.163
ACAD9	ethyl oleate	0.163
ACADM	ethyl oleate	0.163
ACADS	ethyl oleate	0.163
ACADSB	ethyl oleate	0.163
ACADSB	quercetin	0.15
ACADVL	ethyl oleate	0.163
ACADVL	quercetin	0.15
ACAT1	eburicoic acid	0.308
ACAT1	pachymic acid	0.308
ACAT1	quercetin	0.15
ACAT1	sitosterol	0.203
ACAT2	quercetin	0.15
ACBD6	quercetin	0.15
ACE	dehydroeburicoic acid	0.162
ACE	peroxyergosterol	0.167
ACHE	quercetin	0.292
ACOT13	baicalein	0.181
ACOT13	quercetin	0.237
ACOX1	ethyl oleate	0.163
ACOX2	ethyl oleate	0.163
ACOX2	quercetin	0.15
ACOX3	ethyl oleate	0.163
ACOX3	quercetin	0.15
ACOXL	ethyl oleate	0.163
ACP1	cinnamaldehyde	0.177
ACP1	ellagic acid	0.158
ACPP	ellagic acid	0.15
ACPP	quercetin	0.216
ACR	ellagic acid	0.256
ACRC	quercetin	0.15
ACSF2	betulinic acid	0.174
ACSF2	quercetin	0.15
ACSF3	baicalein	0.278
ACSF3	betulinic acid	0.265
ACSL5	quercetin	0.22
ACSL6	quercetin	0.22
ACSM3	quercetin	0.226
ACSM5	quercetin	0.226
ACSS3	quercetin	0.226
ACTA1	catechin	0.15
ACTA1	quercetin	0.299
ACTA2	catechin	0.15
ACTA2	quercetin	0.15
ACTB	quercetin	0.15
ACTC1	catechin	0.15
ACTL6A	ellagic acid	0.15
ACTL6B	ellagic acid	0.15
ACTR1A	quercetin	0.15
ACTR1B	quercetin	0.15
ACTR2	sitosterol	0.26
ACTR6	quercetin	0.15
ACY1	quercetin	0.15
ACYP1	quercetin	0.15
ADA	quercetin	0.15
ADAL	quercetin	0.15
ADAM12	quercetin	0.15
ADAM15	quercetin	0.15
ADAM23	cinnamaldehyde	0.15
ADAM9	quercetin	0.15
ADAMTSL4	quercetin	0.15
ADC	betulinic acid	0.207
ADD1	cinnamaldehyde	0.198
ADD2	cinnamaldehyde	0.198
ADD3	cinnamaldehyde	0.198
ADD3	quercetin	0.15
ADH4	quercetin	0.15
ADH5	quercetin	0.15
ADH6	quercetin	0.15
ADIPOQ	catechin	0.156
ADIPOQ	quercetin	0.824
ADK	cinnamaldehyde	0.15
ADM	cinnamaldehyde	0.15
ADM	quercetin	0.15
ADNP	quercetin	0.15
ADORA1	paeoniflorin	0.168
ADORA2A	quercetin	0.212
ADPRHL2	baicalin	0.234
ADPRM	quercetin	0.15
ADRA1A	pachymic acid	0.173
ADRM1	quercetin	0.15
ADSSL1	quercetin	0.15
AEBP2	pachymic acid	0.155
AEN	quercetin	0.15
AGBL2	quercetin	0.15
AGL	quercetin	0.15
AGMAT	quercetin	0.15
AGMO	campesterol	0.32
AGMO	sitosterol	0.223
AGMO	stigmasterol	0.279
AGPAT9	quercetin	0.15
AGR2	quercetin	0.15
AGT	quercetin	0.15
AGTPBP1	quercetin	0.15
AGTR1	quercetin	0.15
AHR	baicalein	0.15
AHR	kaempferol	0.872
AHR	quercetin	0.711
AHRR	quercetin	0.15
AHSG	quercetin	0.15
AIFM1	cinnamaldehyde	0.178
AIFM1	ellagic acid	0.15
AIFM1	quercetin	0.8
AIFM3	cinnamaldehyde	0.178
AIG1	quercetin	0.15
AIM1	quercetin	0.15
AIMP3	catechin	0.21
AK4	quercetin	0.15
AKAP12	quercetin	0.15
AKIRIN1	quercetin	0.15
AKIRIN2	quercetin	0.15
AKR1A1	campesterol	0.164
AKR1A1	catechin	0.172
AKR1A1	ellagic acid	0.379
AKR1A1	kaempferol	0.158
AKR1A1	quercetin	0.234
AKR1A1	sitosterol	0.164
AKR1B1	campesterol	0.164
AKR1B1	catechin	0.172
AKR1B1	cerevisterol	0.164
AKR1B1	ellagic acid	0.689
AKR1B1	kaempferol	0.266
AKR1B1	sitosterol	0.164
AKR1B10	betulinic acid	0.161
AKR1B10	campesterol	0.164
AKR1B10	catechin	0.172
AKR1B10	ellagic acid	0.431
AKR1B10	kaempferol	0.186
AKR1B10	quercetin	0.315
AKR1B10	sitosterol	0.164
AKR1B15	campesterol	0.151
AKR1B15	catechin	0.172
AKR1B15	ellagic acid	0.337
AKR1B15	quercetin	0.17
AKR1B15	sitosterol	0.151
AKR1C1	campesterol	0.164
AKR1C1	catechin	0.172
AKR1C1	cinnamaldehyde	0.234
AKR1C1	ellagic acid	0.345
AKR1C1	quercetin	0.176
AKR1C1	sitosterol	0.164
AKR1C2	campesterol	0.164
AKR1C2	catechin	0.172
AKR1C2	cinnamaldehyde	0.729
AKR1C2	ellagic acid	0.345
AKR1C2	quercetin	0.278
AKR1C2	sitosterol	0.164
AKR1C3	campesterol	0.164
AKR1C3	catechin	0.172
AKR1C3	ellagic acid	0.345
AKR1C3	quercetin	0.745
AKR1C3	sitosterol	0.164
AKR1C4	campesterol	0.164
AKR1C4	catechin	0.172
AKR1C4	ellagic acid	0.345
AKR1C4	quercetin	0.176
AKR1C4	sitosterol	0.164
AKR1CL1	catechin	0.172
AKR1CL1	ellagic acid	0.325
AKR1CL1	quercetin	0.168
AKR1D1	campesterol	0.164
AKR1D1	catechin	0.172
AKR1D1	ellagic acid	0.345
AKR1D1	quercetin	0.278
AKR1D1	sitosterol	0.164
AKR1E2	campesterol	0.164
AKR1E2	catechin	0.172
AKR1E2	ellagic acid	0.431
AKR1E2	kaempferol	0.186
AKR1E2	quercetin	0.218
AKR1E2	sitosterol	0.164
AKT1	baicalein	0.955
AKT1	betulinic acid	0.725
AKT1	catechin	0.211
AKT1	cinnamaldehyde	0.7
AKT1	ellagic acid	0.214
AKT1	kaempferol	0.856
AKT1	pachymic acid	0.159
AKT1	quercetin	0.957
ALAS1	quercetin	0.15
ALB	catechin	0.213
ALB	quercetin	0.254
ALB	sitosterol	0.205
ALDH18A1	kaempferol	0.21
ALDH1A1	quercetin	0.22
ALDH1B1	quercetin	0.15
ALDH2	quercetin	0.15
ALDH3A2	quercetin	0.15
ALDH4A1	quercetin	0.15
ALDH5A1	campesterol	0.34
ALDH5A1	quercetin	0.15
ALDH5A1	sitosterol	0.225
ALDH5A1	stigmasterol	0.353
ALDH6A1	cinnamaldehyde	0.363
ALDH6A1	quercetin	0.15
ALDOA	baicalein	0.186
ALDOA	quercetin	0.15
ALDOB	baicalein	0.186
ALDOC	baicalein	0.186
ALDOC	quercetin	0.15
ALG1	sitosterol	0.159
ALG10	quercetin	0.15
ALG11	sitosterol	0.159
ALG13	quercetin	0.15
ALG14	quercetin	0.15
ALG1L	sitosterol	0.159
ALG2	sitosterol	0.159
ALG6	quercetin	0.15
ALKBH3	gibberellin A7	0.178
ALMS1	quercetin	0.15
ALOX12	baicalein	0.981
ALOX12	campesterol	0.218
ALOX12	kaempferol	0.724
ALOX12	quercetin	0.879
ALOX12	stigmasterol	0.279
ALOX12B	baicalein	0.399
ALOX12B	campesterol	0.218
ALOX12B	quercetin	0.351
ALOX12B	stigmasterol	0.279
ALOX15	albiflorin	0.19
ALOX15	baicalein	0.935
ALOX15	campesterol	0.218
ALOX15	kaempferol	0.151
ALOX15	paeoniflorin	0.189
ALOX15	quercetin	0.482
ALOX15	stigmasterol	0.279
ALOX15B	baicalein	0.498
ALOX15B	campesterol	0.218
ALOX15B	quercetin	0.351
ALOX15B	stigmasterol	0.279
ALOX5	baicalein	0.585
ALOX5	baicalin	0.818
ALOX5	campesterol	0.218
ALOX5	kaempferol	0.202
ALOX5	quercetin	0.638
ALOX5	stigmasterol	0.279
ALOX5AP	baicalein	0.243
ALOX5AP	quercetin	0.15
ALOXE3	baicalein	0.399
ALOXE3	campesterol	0.218
ALOXE3	quercetin	0.351
ALOXE3	stigmasterol	0.279
ALPI	catechin	0.182
ALPK2	quercetin	0.15
ALPL	catechin	0.495
ALPL	quercetin	0.152
ALPP	catechin	0.262
ALPP	quercetin	0.152
ALPPL2	catechin	0.261
ALPPL2	quercetin	0.153
ALS2	cinnamaldehyde	0.15
AMDHD1	quercetin	0.15
AMMECR1	quercetin	0.15
AMN1	quercetin	0.15
AMOTL2	quercetin	0.15
AMPD1	campesterol	0.163
AMPD1	stigmasterol	0.181
AMPD2	quercetin	0.15
AMPD3	cinnamaldehyde	0.15
AMPD3	quercetin	0.15
AMT	quercetin	0.15
AMY1A	amygdalin	0.163
AMY1B	amygdalin	0.163
AMY1C	amygdalin	0.163
AMY2A	amygdalin	0.163
AMY2B	amygdalin	0.163
ANAPC10	quercetin	0.15
ANAPC4	quercetin	0.15
ANG	quercetin	0.15
ANGEL1	quercetin	0.159
ANGEL2	quercetin	0.159
ANGPTL4	quercetin	0.15
ANGPTL6	trametenolic acid	0.202
ANK1	cinnamaldehyde	0.408
ANK2	quercetin	0.15
ANKH	quercetin	0.15
ANKHD1	quercetin	0.15
ANKMY2	quercetin	0.15
ANKRA2	quercetin	0.15
ANKRD10	quercetin	0.15
ANKRD12	quercetin	0.15
ANKRD16	quercetin	0.15
ANKRD37	quercetin	0.15
ANKRD45	quercetin	0.272
ANKRD5	quercetin	0.15
ANKS4B	quercetin	0.15
ANLN	quercetin	0.15
ANP32E	quercetin	0.15
ANPEP	amygdalin	0.191
ANTXR2	quercetin	0.15
ANXA1	quercetin	0.15
ANXA2	quercetin	0.15
ANXA2	sitosterol	0.2
ANXA5	quercetin	0.176
ANXA6	quercetin	0.15
AOC2	cinnamaldehyde	0.186
AOC2	quercetin	0.15
AOC3	cinnamaldehyde	0.186
AOC3	quercetin	0.214
AOX1	quercetin	0.892
AP1M2	quercetin	0.15
AP1S1	quercetin	0.15
AP3M2	quercetin	0.15
AP5M1	quercetin	0.15
APAF1	ellagic acid	0.15
APAF1	quercetin	0.845
APBA3	quercetin	0.15
APBB2	quercetin	0.15
APC	quercetin	0.15
APEX1	baicalein	0.283
APEX2	baicalein	0.157
APEX2	betulinic acid	0.163
APLP1	quercetin	0.15
APOA1	campesterol	0.172
APOA1	sitosterol	0.277
APOA5	quercetin	0.15
APOB	campesterol	0.231
APOB	catechin	0.822
APOB	quercetin	0.727
APOB	sitosterol	0.342
APOB	taxifolin	0.938
APOBEC3B	quercetin	0.15
APOBEC3G	quercetin	0.15
APOC1	quercetin	0.15
APOC2	quercetin	0.15
APOE	campesterol	0.165
APOE	quercetin	0.243
APOE	sitosterol	0.872
APOF	quercetin	0.15
APOH	quercetin	0.15
APOLD1	quercetin	0.15
APOM	quercetin	0.15
APPL2	quercetin	0.15
AQP11	quercetin	0.15
AQP3	quercetin	0.15
AQPEP	amygdalin	0.191
AR	quercetin	0.943
ARF3	quercetin	0.15
ARFGEF1	quercetin	0.15
ARG1	quercetin	0.15
ARG2	catechin	0.8
ARG2	quercetin	0.15
ARHGAP11A	quercetin	0.15
ARHGAP17	quercetin	0.15
ARHGAP18	quercetin	0.15
ARHGAP19	quercetin	0.15
ARHGAP23	cinnamaldehyde	0.15
ARHGAP27	quercetin	0.15
ARHGAP44	quercetin	0.15
ARHGDIB	quercetin	0.15
ARHGEF28	quercetin	0.15
ARHGEF3	quercetin	0.15
ARID2	quercetin	0.15
ARL13B	quercetin	0.15
ARL15	quercetin	0.15
ARL4D	quercetin	0.15
ARL6	quercetin	0.15
ARL6IP5	quercetin	0.15
ARMCX5	quercetin	0.15
ARNT	quercetin	0.7
ARNTL	quercetin	0.15
ARNTL2	quercetin	0.15
ARRB1	quercetin	0.271
ARRDC1	amygdalin	0.156
ARRDC2	amygdalin	0.156
ARRDC2	quercetin	0.15
ARRDC3	amygdalin	0.156
ARRDC3	quercetin	0.15
ARRDC4	amygdalin	0.156
ARRDC5	amygdalin	0.156
ARSA	quercetin	0.15
ARSE	quercetin	0.15
ARSG	quercetin	0.15
ART4	quercetin	0.15
ARVCF	quercetin	0.15
ASAH1	quercetin	0.15
ASAP2	quercetin	0.15
ASB16-AS1	quercetin	0.15
ASB2	quercetin	0.15
ASB9	quercetin	0.15
ASCC3	quercetin	0.15
ASCL1	ellagic acid	0.15
ASF1B	quercetin	0.15
ASGR1	quercetin	0.15
ASMT	betulinic acid	0.163
ASMT	quercetin	0.15
ASMT	taxifolin	0.197
ASMTL	betulinic acid	0.163
ASMTL	quercetin	0.15
ASMTL	taxifolin	0.197
ASNA1	amygdalin	0.188
ASNS	ellagic acid	0.259
ASNS	spinasterol	0.189
ASPH	quercetin	0.15
ASPHD1	quercetin	0.15
ASPM	quercetin	0.15
ASPRV1	quercetin	0.15
ASPSCR1	quercetin	0.15
ASRGL1	quercetin	0.15
ASS1	quercetin	0.236
ASTE1	quercetin	0.15
ASUN	quercetin	0.15
ATAD1	cinnamaldehyde	0.168
ATAD2	cinnamaldehyde	0.168
ATAD2B	cinnamaldehyde	0.168
ATAD5	baicalein	0.332
ATF3	cinnamaldehyde	0.15
ATF3	ellagic acid	0.15
ATF3	quercetin	0.15
ATF7	ethyl oleate	0.165
ATF7IP	quercetin	0.15
ATG16L2	quercetin	0.15
ATG2A	quercetin	0.15
ATG3	quercetin	0.15
ATG5	ellagic acid	0.15
ATL1	quercetin	0.15
ATL2	quercetin	0.15
ATM	kaempferol	0.7
ATP11A	cinnamaldehyde	0.15
ATP13A1	quercetin	0.15
ATP1A1	quercetin	0.15
ATP1B3	quercetin	0.15
ATP5A1	quercetin	0.957
ATP5B	quercetin	0.961
ATP5C1	quercetin	0.957
ATP5G1	quercetin	0.15
ATP5O	campesterol	0.154
ATP5O	kaempferol	0.154
ATP5O	stigmasterol	0.155
ATP6V0B	quercetin	0.15
ATP6V1C1	quercetin	0.15
ATP6V1D	ellagic acid	0.18
ATP6V1E2	quercetin	0.15
ATP6V1H	spinasterol	0.544
ATP7A	quercetin	0.237
ATP7B	quercetin	0.237
ATP8B1	quercetin	0.15
ATP9A	quercetin	0.15
ATP9B	kaempferol	0.2
ATR	quercetin	0.582
ATXN3	quercetin	0.15
AUH	quercetin	0.15
AURKA	quercetin	0.15
AURKB	quercetin	0.278
AVPR1A	baicalein	0.16
AVPR1B	baicalein	0.16
AVPR2	baicalein	0.193
AXIN2	quercetin	0.15
AXL	quercetin	0.519
AZIN1	betulinic acid	0.207
AZU1	ellagic acid	0.256
B3GALT5	kaempferol	0.15
B3GALTL	quercetin	0.15
B3GAT3	quercetin	0.15
B3GNTL1	quercetin	0.15
B4GALNT1	quercetin	0.15
B4GALT4	quercetin	0.15
BAAT	quercetin	0.15
BACE1	catechin	0.812
BAD	ellagic acid	0.15
BAD	quercetin	0.15
BAG2	quercetin	0.15
BAG4	quercetin	0.15
BAK1	quercetin	0.444
BAMBI	quercetin	0.15
BAP1	gibberellin A7	0.217
BAX	baicalein	0.225
BAX	baicalin	0.242
BAX	cinnamaldehyde	0.15
BAX	kaempferol	0.15
BAX	quercetin	0.734
BAZ1A	quercetin	0.15
BAZ2B	quercetin	0.15
BBC3	kaempferol	0.15
BBS1	stigmasterol	0.162
BBS12	quercetin	0.15
BBS2	quercetin	0.15
BBS4	quercetin	0.15
BBS5	quercetin	0.15
BBS9	quercetin	0.15
BCAM	quercetin	0.15
BCAP29	cinnamaldehyde	0.15
BCAR1	quercetin	0.15
BCAR3	quercetin	0.15
BCAT1	quercetin	0.15
BCHE	catechin	0.19
BCHE	kaempferol	0.266
BCHE	quercetin	0.409
BCHE	sitosterol	0.158
BCHE	stigmasterol	0.168
BCKDK	quercetin	0.15
BCL11A	pachymic acid	0.155
BCL11B	pachymic acid	0.155
BCL2	cinnamaldehyde	0.15
BCL2	ellagic acid	0.15
BCL2	kaempferol	0.15
BCL2	quercetin	0.849
BCL2A1	quercetin	0.444
BCL2L1	quercetin	0.584
BCL2L14	quercetin	0.444
BCL2L2	quercetin	0.15
BCOR	quercetin	0.15
BCR	quercetin	0.15
BDH1	campesterol	0.15
BDH1	quercetin	0.15
BDH2	quercetin	0.15
BDKRB1	cinnamaldehyde	0.295
BDKRB2	cinnamaldehyde	0.547
BECN1	baicalin	0.832
BEX1	quercetin	0.15
BFAR	quercetin	0.15
BGLAP	quercetin	0.15
BHLHE40	quercetin	0.15
BHMT	quercetin	0.15
BHMT2	quercetin	0.15
BICD1	ethyl oleate	0.218
BICD2	ethyl oleate	0.218
BID	cinnamaldehyde	0.7
BID	quercetin	0.7
BIK	quercetin	0.15
BIRC2	cinnamaldehyde	0.15
BIRC3	cinnamaldehyde	0.15
BIRC5	betulinic acid	0.724
BIRC5	quercetin	0.15
BIVM	quercetin	0.15
BLK	quercetin	0.278
BLM	quercetin	0.15
BLOC1S2	quercetin	0.15
BMP1	quercetin	0.15
BMP2	quercetin	0.247
BMP4	quercetin	0.15
BMP6	ellagic acid	0.15
BMP8A	quercetin	0.15
BMPR1A	quercetin	0.272
BMX	quercetin	0.278
BNIP3	quercetin	0.15
BNIP3L	quercetin	0.15
BOK	quercetin	0.444
BORA	quercetin	0.15
BPTF	quercetin	0.15
BRAF	ellagic acid	0.173
BRAT1	spinasterol	0.216
BRCA1	quercetin	0.15
BRCA2	quercetin	0.218
BRD2	quercetin	0.15
BRD7	quercetin	0.15
BRDT	quercetin	0.15
BRF1	ellagic acid	0.15
BRIP1	taxifolin	0.153
BSCL2	quercetin	0.15
BSG	quercetin	0.15
BSN	quercetin	0.15
BTBD11	quercetin	0.15
BTBD2	quercetin	0.15
BTF3L4	quercetin	0.15
BTG1	quercetin	0.15
BTG2	quercetin	0.15
BTK	quercetin	0.278
BUB1	quercetin	0.218
BUB1B	quercetin	0.15
BUB3	quercetin	0.15
C10orf10	quercetin	0.15
C10orf11	quercetin	0.15
C10orf32	quercetin	0.15
C10orf90	ent-epicatechin	0.252
C11orf52	quercetin	0.15
C11orf54	quercetin	0.15
C11orf96	quercetin	0.15
C12orf5	quercetin	0.15
C12orf50	ellagic acid	0.272
C12orf60	quercetin	0.15
C12orf65	cinnamaldehyde	0.17
C12orf75	quercetin	0.15
C14orf1	quercetin	0.15
C14orf1	sitosterol	0.155
C14orf182	paeonol	0.167
C14orf28	quercetin	0.15
C15orf48	quercetin	0.15
C16orf45	quercetin	0.15
C16orf58	quercetin	0.15
C16orf87	quercetin	0.15
C17orf100	quercetin	0.15
C17orf58	quercetin	0.15
C17orf62	quercetin	0.15
C17orf75	quercetin	0.15
C18orf54	quercetin	0.15
C19orf18	quercetin	0.15
C19orf25	quercetin	0.15
C19orf80	quercetin	0.15
C1GALT1	quercetin	0.15
C1GALT1C1	quercetin	0.15
C1orf106	campesterol	0.157
C1orf106	sitosterol	0.157
C1orf115	quercetin	0.15
C1orf162	quercetin	0.15
C1orf216	quercetin	0.15
C1orf64	quercetin	0.15
C1R	ellagic acid	0.256
C1RL	ellagic acid	0.256
C1S	ellagic acid	0.256
C2	ellagic acid	0.256
C20orf132	quercetin	0.15
C21orf59	quercetin	0.15
C22orf25	quercetin	0.15
C2CD2	quercetin	0.15
C2CD4A	quercetin	0.15
C2orf72	quercetin	0.15
C2orf76	quercetin	0.15
C2orf82	quercetin	0.15
C3orf33	quercetin	0.15
C3orf35	quercetin	0.15
C3orf38	quercetin	0.15
C3orf52	quercetin	0.15
C3orf62	quercetin	0.15
C4BPA	quercetin	0.15
C4BPB	quercetin	0.15
C4orf27	quercetin	0.15
C4orf3	quercetin	0.15
C4orf48	quercetin	0.15
C4orf52	quercetin	0.15
C5	quercetin	0.15
C5AR1	quercetin	0.15
C5orf34	quercetin	0.15
C5orf4	campesterol	0.153
C5orf4	sitosterol	0.213
C5orf4	sitosterol α1	0.823
C5orf4	stigmasterol	0.305
C6orf1	quercetin	0.15
C6orf226	quercetin	0.15
C6orf48	quercetin	0.15
C6orf52	quercetin	0.15
C7orf50	quercetin	0.15
C7orf53	quercetin	0.15
C7orf55	quercetin	0.15
C7orf60	quercetin	0.15
C8A	quercetin	0.15
C8B	quercetin	0.15
C8G	quercetin	0.15
C8orf4	quercetin	0.15
C8orf40	quercetin	0.15
C8orf59	quercetin	0.15
C9orf152	quercetin	0.15
C9orf41	quercetin	0.15
C9orf85	quercetin	0.15
C9orf91	quercetin	0.15
CA1	ellagic acid	0.816
CA1	taxifolin	0.174
CA10	taxifolin	0.174
CA11	taxifolin	0.174
CA12	ellagic acid	0.812
CA12	taxifolin	0.174
CA13	taxifolin	0.174
CA14	ellagic acid	0.812
CA14	taxifolin	0.174
CA2	ellagic acid	0.817
CA2	quercetin	0.214
CA2	taxifolin	0.174
CA3	ellagic acid	0.812
CA3	taxifolin	0.174
CA4	ellagic acid	0.812
CA4	taxifolin	0.174
CA5A	ellagic acid	0.812
CA5A	taxifolin	0.174
CA5B	ellagic acid	0.812
CA5B	taxifolin	0.174
CA6	ellagic acid	0.812
CA6	taxifolin	0.174
CA7	catechin	0.259
CA7	ellagic acid	0.812
CA7	taxifolin	0.174
CA8	taxifolin	0.174
CA9	ellagic acid	0.812
CA9	taxifolin	0.174
CABLES1	quercetin	0.15
CACYBP	quercetin	0.15
CAD	quercetin	0.15
CADM1	quercetin	0.15
CADPS2	quercetin	0.15
CALCA	quercetin	0.156
CALM2	quercetin	0.183
CALR	ellagic acid	0.15
CAMK1	quercetin	0.15
CAMK2B	quercetin	0.235
CAMKK1	taxifolin	0.26
CAMKK2	taxifolin	0.26
CAMKMT	quercetin	0.15
CAMSAP3	quercetin	0.15
CAMTA2	quercetin	0.15
CAND1	quercetin	0.15
CAPN2	quercetin	0.15
CAPRIN2	quercetin	0.15
CARD16	paeonol	0.383
CARD17	paeonol	0.383
CARD18	paeonol	0.383
CARD8	paeonol	0.383
CASC5	quercetin	0.15
CASD1	quercetin	0.15
CASP1	betulinic acid	0.276
CASP1	cinnamaldehyde	0.15
CASP1	paeonol	0.383
CASP1	quercetin	0.15
CASP10	baicalin	0.712
CASP10	paeonol	0.712
CASP12	paeonol	0.383
CASP14	paeonol	0.383
CASP14	quercetin	0.155
CASP16	paeonol	0.383
CASP2	paeonol	0.383
CASP3	baicalein	0.176
CASP3	baicalin	0.829
CASP3	betulinic acid	0.739
CASP3	catechin	0.195
CASP3	cinnamaldehyde	0.7
CASP3	ellagic acid	0.738
CASP3	kaempferol	0.743
CASP3	paeonol	0.435
CASP3	peroxyergosterol	0.7
CASP3	quercetin	0.953
CASP3	sitosterol	0.818
CASP4	paeonol	0.383
CASP5	paeonol	0.383
CASP6	paeonol	0.383
CASP6	quercetin	0.15
CASP7	betulinic acid	0.7
CASP7	paeonol	0.383
CASP7	quercetin	0.7
CASP8	baicalin	0.784
CASP8	cinnamaldehyde	0.7
CASP8	paeonol	0.786
CASP8	quercetin	0.736
CASP9	ellagic acid	0.15
CASP9	kaempferol	0.722
CASP9	paeonol	0.383
CASP9	quercetin	0.933
CAT	amygdalin	0.233
CAT	baicalein	0.19
CAT	catechin	0.522
CAT	ellagic acid	0.406
CAT	kaempferol	0.39
CAT	quercetin	0.895
CAT	sitosterol	0.29
CATSPER3	quercetin	0.15
CAV1	sitosterol	0.157
CBR4	kaempferol	0.233
CBR4	quercetin	0.611
CBS	quercetin	0.15
CBX5	quercetin	0.15
CBX6	quercetin	0.15
CC2D1B	quercetin	0.15
CCBL2	quercetin	0.15
CCDC109B	quercetin	0.15
CCDC120	campesterol	0.157
CCDC120	sitosterol	0.157
CCDC126	quercetin	0.15
CCDC130	quercetin	0.15
CCDC138	quercetin	0.15
CCDC15	quercetin	0.15
CCDC17	quercetin	0.15
CCDC34	cinnamaldehyde	0.15
CCDC62	quercetin	0.15
CCDC68	quercetin	0.15
CCDC69	quercetin	0.15
CCDC81	quercetin	0.15
CCDC88A	quercetin	0.15
CCDC92	quercetin	0.15
CCHCR1	quercetin	0.15
CCL15	quercetin	0.15
CCL16	quercetin	0.15
CCL2	ellagic acid	0.7
CCL2	kaempferol	0.818
CCL2	quercetin	0.952
CCL3	cinnamaldehyde	0.7
CCL5	cinnamaldehyde	0.7
CCNA2	baicalein	0.15
CCNA2	baicalin	0.15
CCNA2	quercetin	0.15
CCNB1	baicalein	0.8
CCNB1	kaempferol	0.238
CCNB1	quercetin	0.229
CCNB1IP1	quercetin	0.15
CCNB2	quercetin	0.227
CCND1	baicalein	0.839
CCND1	baicalin	0.15
CCND1	quercetin	0.331
CCND2	quercetin	0.15
CCND3	quercetin	0.15
CCNE1	quercetin	0.15
CCNE2	quercetin	0.15
CCNF	quercetin	0.15
CCNG2	quercetin	0.15
CCPG1	quercetin	0.15
CCR6	quercetin	0.15
CCR7	quercetin	0.15
CCT3	catechin	0.176
CCT5	campesterol	0.195
CCT5	sitosterol	0.195
CCT5	stigmasterol	0.196
CD109	quercetin	0.15
CD14	ellagic acid	0.15
CD151	quercetin	0.15
CD2	campesterol	0.171
CD22	taxifolin	0.18
CD274	cinnamaldehyde	0.15
CD274	quercetin	0.231
CD302	quercetin	0.15
CD36	campesterol	0.167
CD3D	quercetin	0.15
CD46	quercetin	0.15
CD55	quercetin	0.15
CD59	quercetin	0.15
CD5L	sitosterol	0.294
CD5L	stigmasterol	0.297
CD63	quercetin	0.15
CD68	sitosterol	0.233
CD68	stigmasterol	0.234
CD7	quercetin	0.15
CD74	quercetin	0.15
CD83	quercetin	0.15
CD86	cinnamaldehyde	0.15
CD9	quercetin	0.15
CD93	quercetin	0.15
CD97	quercetin	0.843
CDA	quercetin	0.15
CDC14A	ethyl oleate	0.166
CDC14A	quercetin	0.199
CDC14B	ethyl oleate	0.166
CDC16	quercetin	0.15
CDC20	quercetin	0.15
CDC25A	taxifolin	0.15
CDC25C	quercetin	0.15
CDC27	quercetin	0.15
CDC37	quercetin	0.15
CDC37	stigmasterol	0.159
CDC37L1	stigmasterol	0.159
CDC42BPB	quercetin	0.278
CDC45	betulinic acid	0.246
CDC45	quercetin	0.15
CDC6	quercetin	0.15
CDC7	quercetin	0.15
CDC73	quercetin	0.15
CDCA3	quercetin	0.15
CDCA5	quercetin	0.15
CDCA7	paeonol	0.164
CDCA7L	quercetin	0.15
CDH1	quercetin	0.15
CDH11	quercetin	0.15
CDH2	quercetin	0.15
CDIP1	quercetin	0.15
CDK1	baicalein	0.842
CDK1	betulinic acid	0.236
CDK1	ellagic acid	0.15
CDK1	kaempferol	0.938
CDK1	quercetin	0.491
CDK14	baicalein	0.236
CDK14	betulinic acid	0.236
CDK15	baicalein	0.236
CDK15	betulinic acid	0.236
CDK16	baicalein	0.236
CDK16	betulinic acid	0.236
CDK17	baicalein	0.236
CDK17	betulinic acid	0.236
CDK18	baicalein	0.236
CDK18	betulinic acid	0.236
CDK2	baicalein	0.843
CDK2	betulinic acid	0.236
CDK2	kaempferol	0.8
CDK2	quercetin	0.725
CDK3	baicalein	0.238
CDK3	betulinic acid	0.236
CDK4	baicalein	0.862
CDK4	betulinic acid	0.236
CDK4	quercetin	0.22
CDK5	baicalein	0.236
CDK5	betulinic acid	0.236
CDK5R1	quercetin	0.15
CDK5RAP2	quercetin	0.15
CDK6	baicalein	0.236
CDK6	betulinic acid	0.236
CDK6	kaempferol	0.235
CDK6	quercetin	0.235
CDK8	quercetin	0.15
CDK9	quercetin	0.15
CDKAL1	quercetin	0.15
CDKN1A	cinnamaldehyde	0.15
CDKN1A	ellagic acid	0.15
CDKN1A	kaempferol	0.15
CDKN1A	quercetin	0.733
CDKN1B	quercetin	0.254
CDKN1C	quercetin	0.15
CDKN2A	quercetin	0.725
CDKN2B	quercetin	0.15
CDKN2C	kaempferol	0.15
CDKN2C	quercetin	0.15
CDKN3	ethyl oleate	0.166
CDKN3	quercetin	0.15
CDO1	quercetin	0.15
CDR2L	quercetin	0.15
CDRT4	quercetin	0.15
CDS1	quercetin	0.15
CDT1	quercetin	0.15
CDX1	baicalin	0.8
CDX2	baicalin	0.8
CEACAM5	quercetin	0.15
CEBPA	quercetin	0.15
CEBPD	catechin	0.185
CEL	quercetin	0.212
CELA1	ellagic acid	0.256
CELA2A	ellagic acid	0.256
CELA2B	ellagic acid	0.256
CELA3A	ellagic acid	0.256
CELA3B	ellagic acid	0.256
CELF1	quercetin	0.15
CENPA	quercetin	0.15
CENPC1	quercetin	0.29
CENPE	quercetin	0.15
CENPF	quercetin	0.15
CENPI	quercetin	0.15
CENPJ	quercetin	0.15
CENPK	quercetin	0.15
CEP128	quercetin	0.15
CEP135	quercetin	0.15
CEP55	quercetin	0.15
CEP68	quercetin	0.15
CEP70	quercetin	0.15
CEP72	quercetin	0.15
CEP78	quercetin	0.15
CEP89	quercetin	0.15
CERS5	quercetin	0.228
CES1	cinnamaldehyde	0.15
CES2	quercetin	0.15
CETN1	baicalein	0.207
CETN1	betulinic acid	0.224
CETN2	baicalein	0.207
CETN2	betulinic acid	0.224
CETN3	baicalein	0.207
CETN3	betulinic acid	0.224
CETP	campesterol	0.18
CETP	stigmasterol	0.15
CFB	ellagic acid	0.256
CFB	quercetin	0.22
CFD	ellagic acid	0.256
CFI	ellagic acid	0.256
CFI	quercetin	0.15
CFL1	quercetin	0.15
CFLAR	paeonol	0.383
CFLAR	quercetin	0.15
CFTR	baicalein	0.7
CFTR	quercetin	0.7
CGB	gibberellin A7	0.172
CGB1	gibberellin A7	0.172
CGB2	gibberellin A7	0.172
CGB5	gibberellin A7	0.172
CGB7	gibberellin A7	0.172
CGB8	gibberellin A7	0.172
CGNL1	quercetin	0.15
CH25H	campesterol	0.153
CH25H	sitosterol	0.193
CH25H	stigmasterol	0.305
CHAF1B	quercetin	0.15
CHCHD10	quercetin	0.15
CHD1L	quercetin	0.15
CHD2	quercetin	0.15
CHEK1	catechin	0.165
CHEK1	quercetin	0.166
CHEK2	quercetin	0.7
CHKA	quercetin	0.15
CHML	quercetin	0.15
CHN2	quercetin	0.15
CHORDC1	quercetin	0.15
CHP1	kaempferol	0.222
CHP2	kaempferol	0.222
CHPF	quercetin	0.15
CHRDL2	polyporenic acid C	0.175
CHRDL2	poricoic acid A	0.271
CHRNA10	quercetin	0.15
CHST13	quercetin	0.15
CHST15	quercetin	0.15
CHST3	quercetin	0.15
CHST9	quercetin	0.15
CHTF18	quercetin	0.15
CHTF8	quercetin	0.15
CHUK	kaempferol	0.7
CHUK	quercetin	0.7
CIB1	kaempferol	0.222
CIB4	kaempferol	0.222
CIDEB	quercetin	0.15
CIDEC	quercetin	0.15
CIRBP	quercetin	0.15
CITED1	quercetin	0.15
CITED2	quercetin	0.15
CKB	catechin	0.161
CKB	quercetin	0.7
CKLF	quercetin	0.15
CKM	catechin	0.161
CKMT1A	catechin	0.161
CKMT1B	catechin	0.161
CKMT2	catechin	0.161
CLASP2	quercetin	0.15
CLCN1	peroxyergosterol	0.18
CLCN2	peroxyergosterol	0.18
CLCN3	peroxyergosterol	0.18
CLCN3	quercetin	0.15
CLCN4	peroxyergosterol	0.18
CLCN5	peroxyergosterol	0.18
CLCN5	quercetin	0.15
CLCN6	peroxyergosterol	0.18
CLCN7	peroxyergosterol	0.18
CLCNKA	peroxyergosterol	0.18
CLCNKB	peroxyergosterol	0.18
CLDN1	quercetin	0.15
CLDN10	quercetin	0.15
CLDN14	quercetin	0.15
CLDN4	quercetin	0.261
CLEC4A	cinnamaldehyde	0.15
CLGN	quercetin	0.15
CLIP2	quercetin	0.15
CLK1	quercetin	0.231
CLK2	cinnamaldehyde	0.15
CLMN	quercetin	0.15
CLN5	quercetin	0.15
CLP1	quercetin	0.15
CLPX	amygdalin	0.18
CLPX	quercetin	0.15
CLTA	campesterol	0.232
CLTA	sitosterol	0.196
CLTA	stigmasterol	0.214
CLTB	campesterol	0.232
CLTB	quercetin	0.15
CLTB	sitosterol	0.196
CLTB	stigmasterol	0.214
CLVS1	spinasterol	0.271
CLVS2	spinasterol	0.271
CLYBL	quercetin	0.15
CMA1	ellagic acid	0.256
CMBL	quercetin	0.15
CMPK2	catechin	0.163
CMPK2	quercetin	0.15
CMTM7	quercetin	0.15
CNOT2	cinnamaldehyde	0.15
CNOT7	baicalein	0.15
CNOT8	baicalein	0.165
CNOT8	quercetin	0.15
CNR1	cinnamaldehyde	0.169
CNR2	cinnamaldehyde	0.169
CNTRL	quercetin	0.15
COBLL1	quercetin	0.15
COG2	campesterol	0.213
COG2	sitosterol	0.317
COG5	quercetin	0.15
COG6	quercetin	0.15
COIL	quercetin	0.15
COL18A1	quercetin	0.15
COL2A1	quercetin	0.15
COL3A1	quercetin	0.15
COL7A1	cinnamaldehyde	0.15
COL7A1	quercetin	0.15
COLEC12	quercetin	0.15
COMMD1	quercetin	0.15
COMMD10	quercetin	0.15
COMMD8	quercetin	0.15
COMT	catechin	0.284
COMT	quercetin	0.265
COMTD1	quercetin	0.17
COPE	quercetin	0.15
COPS4	quercetin	0.15
COPS5	quercetin	0.15
COQ3	quercetin	0.15
COQ6	kaempferol	0.424
COQ6	quercetin	0.337
COQ6	sitosterol	0.212
CORIN	ellagic acid	0.256
CORO2A	quercetin	0.15
CORO2B	quercetin	0.15
COTL1	quercetin	0.15
COX10	dehydroeburicoic acid	0.187
COX11	quercetin	0.15
COX18	quercetin	0.175
COX19	quercetin	0.15
COX20	quercetin	0.15
CP	amygdalin	0.186
CP	quercetin	0.15
CPB2	quercetin	0.15
CPED1	quercetin	0.15
CPN1	quercetin	0.15
CPN2	quercetin	0.15
CPNE2	quercetin	0.15
CPQ	quercetin	0.15
CPT1A	quercetin	0.15
CPT1B	quercetin	0.15
CPT2	quercetin	0.15
CPVL	betulinic acid	0.221
CPVL	catechin	0.153
CPVL	hederagenin	0.161
CPVL	quercetin	0.15
CREB1	cinnamaldehyde	0.15
CREB1	kaempferol	0.179
CREB3L2	quercetin	0.241
CREB3L3	quercetin	0.232
CREBBP	quercetin	0.15
CREM	cinnamaldehyde	0.15
CRHR2	quercetin	0.312
CRIM1	cinnamaldehyde	0.15
CRIPT	quercetin	0.15
CRKL	cinnamaldehyde	0.7
CRLF1	quercetin	0.15
CRLF3	quercetin	0.15
CRLS1	quercetin	0.15
CRMP1	baicalin	0.173
CRMP1	kaempferol	0.17
CRMP1	sitosterol	0.161
CRP	catechin	0.205
CRP	kaempferol	0.228
CRP	quercetin	0.319
CRP	sitosterol	0.215
CRYGS	quercetin	0.15
CRYL1	quercetin	0.15
CRYM	quercetin	0.15
CRYZ	baicalin	0.222
CRYZ	betulinic acid	0.166
CRYZ	cinnamaldehyde	0.168
CRYZL1	baicalin	0.297
CRYZL1	betulinic acid	0.223
CRYZL1	quercetin	0.15
CSF1R	quercetin	0.278
CSF2	baicalein	0.15
CSF2	catechin	0.8
CSF2	kaempferol	0.7
CSF2	quercetin	0.938
CSF3R	quercetin	0.15
CSGALNACT1	quercetin	0.15
CSGALNACT2	quercetin	0.15
CSK	quercetin	0.278
CSN1S1	campesterol	0.588
CSN1S1	sitosterol	0.342
CSN1S1	stigmasterol	0.32
CSNK2A1	ellagic acid	0.958
CSNK2A2	quercetin	0.15
CSRP2	quercetin	0.15
CSTA	quercetin	0.15
CSTF2	quercetin	0.15
CTAGE5	quercetin	0.15
CTC1	amygdalin	0.197
CTC1	quercetin	0.15
CTGF	cinnamaldehyde	0.15
CTGF	quercetin	0.15
CTHRC1	quercetin	0.15
CTNNA1	quercetin	0.15
CTNNB1	quercetin	0.772
CTPS1	quercetin	0.274
CTPS2	quercetin	0.171
CTRB1	ellagic acid	0.256
CTRB2	ellagic acid	0.256
CTRC	ellagic acid	0.256
CTRL	catechin	0.333
CTRL	ellagic acid	0.256
CTSA	betulinic acid	0.221
CTSA	catechin	0.153
CTSA	hederagenin	0.161
CTSB	quercetin	0.15
CTSC	quercetin	0.15
CTSD	quercetin	0.15
CTSD	sitosterol	0.159
CTSE	sitosterol	0.159
CTSE	stigmasterol	0.436
CTSF	baicalein	0.154
CTSF	betulinic acid	0.154
CTSG	ellagic acid	0.256
CTSO	baicalein	0.154
CTSO	betulinic acid	0.154
CTSW	baicalein	0.154
CTSW	betulinic acid	0.154
CTTN	quercetin	0.15
CTTNBP2	amygdalin	0.166
CUEDC1	quercetin	0.15
CUEDC2	quercetin	0.15
CUL4B	quercetin	0.15
CUTC	quercetin	0.15
CUZD1	quercetin	0.15
CWC27	campesterol	0.173
CWC27	sitosterol	0.163
CX3CL1	quercetin	0.15
CXCL10	quercetin	0.7
CXCL16	quercetin	0.15
CXCL16	sitosterol	0.177
CXCL16	stigmasterol	0.18
CXCL2	quercetin	0.15
CXCR4	quercetin	0.8
CYB5A	quercetin	0.225
CYB5A	sitosterol	0.174
CYB5B	sitosterol	0.174
CYB5R1	campesterol	0.156
CYB5R1	taxifolin	0.166
CYB5R2	campesterol	0.156
CYB5R2	taxifolin	0.191
CYB5R3	campesterol	0.156
CYB5R3	taxifolin	0.191
CYB5R4	campesterol	0.156
CYB5RL	campesterol	0.156
CYBA	quercetin	0.15
CYBB	baicalein	0.174
CYBB	quercetin	0.733
CYCS	betulinic acid	0.824
CYGB	quercetin	0.15
CYP11A1	spinasterol	0.184
CYP11B1	quercetin	0.15
CYP11B1	spinasterol	0.184
CYP11B2	spinasterol	0.184
CYP17A1	spinasterol	0.184
CYP19A1	baicalein	0.298
CYP19A1	catechin	0.158
CYP19A1	kaempferol	0.15
CYP19A1	quercetin	0.941
CYP19A1	spinasterol	0.184
CYP1A1	baicalein	0.734
CYP1A1	catechin	0.204
CYP1A1	ellagic acid	0.444
CYP1A1	kaempferol	0.847
CYP1A1	quercetin	0.963
CYP1A1	spinasterol	0.184
CYP1A2	baicalein	0.938
CYP1A2	catechin	0.302
CYP1A2	kaempferol	0.84
CYP1A2	quercetin	0.954
CYP1A2	spinasterol	0.184
CYP1B1	baicalein	0.758
CYP1B1	kaempferol	0.885
CYP1B1	quercetin	0.975
CYP1B1	spinasterol	0.184
CYP20A1	quercetin	0.367
CYP20A1	spinasterol	0.184
CYP21A2	spinasterol	0.184
CYP24A1	quercetin	0.15
CYP24A1	spinasterol	0.184
CYP26A1	quercetin	0.367
CYP26A1	spinasterol	0.184
CYP26B1	quercetin	0.367
CYP26B1	spinasterol	0.184
CYP26C1	quercetin	0.367
CYP26C1	spinasterol	0.184
CYP27A1	spinasterol	0.184
CYP27B1	quercetin	0.15
CYP27B1	spinasterol	0.184
CYP27C1	spinasterol	0.184
CYP2A13	catechin	0.163
CYP2A13	spinasterol	0.184
CYP2A6	catechin	0.345
CYP2A6	ellagic acid	0.24
CYP2A6	spinasterol	0.184
CYP2A7	catechin	0.429
CYP2A7	spinasterol	0.184
CYP2B6	baicalein	0.15
CYP2B6	ellagic acid	0.2
CYP2B6	kaempferol	0.8
CYP2B6	spinasterol	0.184
CYP2C18	spinasterol	0.184
CYP2C19	spinasterol	0.184
CYP2C8	quercetin	0.964
CYP2C8	spinasterol	0.184
CYP2C9	quercetin	0.728
CYP2C9	spinasterol	0.184
CYP2D6	catechin	0.51
CYP2D6	quercetin	0.722
CYP2D6	spinasterol	0.184
CYP2E1	baicalin	0.8
CYP2E1	spinasterol	0.184
CYP2F1	catechin	0.3
CYP2F1	spinasterol	0.184
CYP2J2	quercetin	0.15
CYP2J2	spinasterol	0.184
CYP2R1	spinasterol	0.184
CYP2S1	quercetin	0.15
CYP2S1	spinasterol	0.184
CYP2U1	spinasterol	0.184
CYP2W1	spinasterol	0.184
CYP39A1	spinasterol	0.184
CYP3A4	baicalein	0.938
CYP3A4	baicalin	0.8
CYP3A4	catechin	0.209
CYP3A4	kaempferol	0.728
CYP3A4	quercetin	0.953
CYP3A4	spinasterol	0.184
CYP3A43	spinasterol	0.184
CYP3A5	quercetin	0.249
CYP3A5	spinasterol	0.184
CYP3A7	spinasterol	0.184
CYP46A1	quercetin	0.367
CYP46A1	spinasterol	0.184
CYP4A11	quercetin	0.684
CYP4A11	spinasterol	0.184
CYP4A22	quercetin	0.684
CYP4A22	spinasterol	0.184
CYP4B1	quercetin	0.543
CYP4B1	spinasterol	0.184
CYP4F11	quercetin	0.514
CYP4F11	spinasterol	0.184
CYP4F12	quercetin	0.445
CYP4F12	spinasterol	0.184
CYP4F2	quercetin	0.445
CYP4F2	spinasterol	0.184
CYP4F22	quercetin	0.445
CYP4F22	spinasterol	0.184
CYP4F3	quercetin	0.445
CYP4F3	spinasterol	0.184
CYP4V2	quercetin	0.433
CYP4V2	spinasterol	0.184
CYP4X1	quercetin	0.543
CYP4X1	spinasterol	0.184
CYP4Z1	quercetin	0.543
CYP4Z1	spinasterol	0.184
CYP51A1	campesterol	0.193
CYP51A1	peroxyergosterol	0.156
CYP51A1	quercetin	0.226
CYP51A1	spinasterol	0.184
CYP51A1	stigmasterol	0.157
CYP7A1	campesterol	0.649
CYP7A1	cinnamaldehyde	0.15
CYP7A1	sitosterol	0.771
CYP7A1	spinasterol	0.184
CYP7A1	stigmasterol	0.243
CYP7B1	spinasterol	0.184
CYP8B1	quercetin	0.15
CYP8B1	spinasterol	0.184
CYR61	quercetin	0.15
DAB2	quercetin	0.15
DACT3	gibberellin A7	0.224
DAPK1	quercetin	0.15
DARS	quercetin	0.15
DAXX	ellagic acid	0.15
DBF4	quercetin	0.15
DBN1	quercetin	0.15
DBR1	quercetin	0.15
DCAF16	quercetin	0.15
DCAF6	quercetin	0.15
DCAF7	catechin	0.38
DCAF7	kaempferol	0.245
DCAF7	quercetin	0.325
DCBLD2	quercetin	0.15
DCC	taxifolin	0.15
DCDC2	quercetin	0.15
DCK	betulinic acid	0.47
DCK	quercetin	0.15
DCP1B	quercetin	0.15
DCP2	gibberellin A7	0.163
DCPS	quercetin	0.15
DCUN1D2	quercetin	0.15
DDB2	quercetin	0.15
DDC	quercetin	0.279
DDI1	quercetin	0.164
DDI2	quercetin	0.164
DDIT3	cinnamaldehyde	0.15
DDIT3	quercetin	0.15
DDIT4	baicalein	0.8
DDIT4	cinnamaldehyde	0.15
DDIT4	quercetin	0.15
DDOST	campesterol	0.186
DDOST	stigmasterol	0.177
DDX11	quercetin	0.15
DDX11	taxifolin	0.153
DDX17	quercetin	0.15
DDX20	quercetin	0.15
DDX39A	quercetin	0.15
DDX52	quercetin	0.15
DDX58	quercetin	0.15
DECR1	catechin	0.19
DECR1	kaempferol	0.154
DECR1	quercetin	0.346
DEF8	quercetin	0.15
DEGS1	taxifolin	0.203
DEGS2	taxifolin	0.172
DEK	quercetin	0.15
DENND1A	quercetin	0.15
DENR	quercetin	0.15
DEPDC1	quercetin	0.15
DEPDC1B	quercetin	0.15
DEPDC7	quercetin	0.15
DEPTOR	quercetin	0.15
DES	campesterol	0.212
DES	stigmasterol	0.209
DFFA	ellagic acid	0.15
DFFA	quercetin	0.15
DFFB	quercetin	0.15
DFNA5	quercetin	0.15
DGAT2	quercetin	0.15
DGCR8	quercetin	0.15
DGKA	quercetin	0.15
DGUOK	betulinic acid	0.236
DHCR24	campesterol	0.92
DHCR24	quercetin	0.15
DHCR24	sitosterol	0.841
DHCR24	stigmasterol	0.187
DHCR7	campesterol	0.305
DHCR7	quercetin	0.15
DHCR7	sitosterol	0.356
DHCR7	stigmasterol	0.3
DHFR	baicalein	0.177
DHFRL1	baicalein	0.177
DHFRL1	quercetin	0.15
DHH	sitosterol	0.202
DHPS	ellagic acid	0.185
DHRS11	catechin	0.215
DHRS13	quercetin	0.15
DHRS7	quercetin	0.15
DHRS9	campesterol	0.15
DHX29	quercetin	0.15
DHX40	quercetin	0.15
DIABLO	quercetin	0.7
DIMT1	quercetin	0.15
DIO1	quercetin	0.15
DIO2	kaempferol	0.7
DIO2	quercetin	0.7
DIP2A	betulinic acid	0.174
DIP2A	quercetin	0.15
DIP2B	betulinic acid	0.174
DIP2C	betulinic acid	0.174
DIRC2	quercetin	0.15
DKK4	quercetin	0.15
DLD	baicalein	0.165
DLD	quercetin	0.15
DLG1	quercetin	0.218
DLGAP5	quercetin	0.15
DLX2	quercetin	0.15
DLX6	quercetin	0.15
DMPK	quercetin	0.15
DMXL1	quercetin	0.15
DMXL2	quercetin	0.15
DNAAF2	quercetin	0.15
DNAJA1	quercetin	0.15
DNAJB1	quercetin	0.235
DNAJB2	quercetin	0.15
DNAJB4	cinnamaldehyde	0.15
DNAJB4	quercetin	0.15
DNAJC12	quercetin	0.15
DNAJC2	gibberellin A7	0.158
DNAJC2	quercetin	0.231
DNAJC3	quercetin	0.233
DNAJC6	hederagenin	0.187
DNASE1L1	quercetin	0.15
DNASE1L3	quercetin	0.15
DNHD1	quercetin	0.15
DNM1	quercetin	0.2
DNM1	spinasterol	0.237
DNM1L	quercetin	0.2
DNM1L	spinasterol	0.237
DNM2	quercetin	0.2
DNM2	spinasterol	0.237
DNM3	quercetin	0.2
DNM3	spinasterol	0.237
DNMT1	catechin	0.842
DNMT1	quercetin	0.22
DNMT3B	cinnamaldehyde	0.15
DNTT	cerevisterol	0.162
DNTTIP2	quercetin	0.15
DOCK4	quercetin	0.15
DOCK5	quercetin	0.15
DOHH	ellagic acid	0.239
DOK6	quercetin	0.15
DOLK	quercetin	0.15
DOLPP1	ethyl oleate	0.168
DOPEY1	quercetin	0.15
DPEP1	catechin	0.172
DPH3	quercetin	0.15
DPM2	quercetin	0.15
DPM3	quercetin	0.15
DPP4	quercetin	0.15
DPY30	quercetin	0.15
DPYD	quercetin	0.329
DPYS	baicalin	0.173
DPYS	kaempferol	0.17
DPYS	sitosterol	0.161
DPYSL2	baicalin	0.173
DPYSL2	kaempferol	0.17
DPYSL2	quercetin	0.232
DPYSL2	sitosterol	0.161
DPYSL3	baicalin	0.173
DPYSL3	kaempferol	0.17
DPYSL3	sitosterol	0.161
DPYSL4	baicalin	0.173
DPYSL4	kaempferol	0.17
DPYSL4	quercetin	0.232
DPYSL4	sitosterol	0.161
DPYSL5	baicalin	0.173
DPYSL5	kaempferol	0.17
DPYSL5	sitosterol	0.161
DRAM1	quercetin	0.15
DRAP1	quercetin	0.15
DRD4	quercetin	0.525
DRG2	quercetin	0.15
DROSHA	quercetin	0.15
DSC2	quercetin	0.15
DSCR6	quercetin	0.15
DSE	quercetin	0.15
DSTN	quercetin	0.15
DSTYK	quercetin	0.278
DTD2	quercetin	0.15
DTL	quercetin	0.15
DTWD1	quercetin	0.15
DTYMK	catechin	0.163
DUOX1	baicalein	0.174
DUOX1	quercetin	0.524
DUOX2	baicalein	0.174
DUOX2	quercetin	0.524
DUPD1	ethyl oleate	0.166
DUS1L	sitosterol	0.228
DUS2L	sitosterol	0.161
DUS3L	sitosterol	0.161
DUS4L	sitosterol	0.228
DUSP1	ethyl oleate	0.166
DUSP1	quercetin	0.15
DUSP10	ethyl oleate	0.166
DUSP12	ethyl oleate	0.166
DUSP13	ethyl oleate	0.166
DUSP14	ethyl oleate	0.166
DUSP15	ethyl oleate	0.166
DUSP16	ethyl oleate	0.166
DUSP18	ethyl oleate	0.166
DUSP19	ethyl oleate	0.166
DUSP2	ethyl oleate	0.166
DUSP21	ethyl oleate	0.166
DUSP22	ethyl oleate	0.166
DUSP23	ethyl oleate	0.166
DUSP26	ethyl oleate	0.166
DUSP27	ethyl oleate	0.166
DUSP28	ethyl oleate	0.166
DUSP28	quercetin	0.15
DUSP3	ellagic acid	0.253
DUSP3	ethyl oleate	0.166
DUSP4	ethyl oleate	0.166
DUSP4	quercetin	0.15
DUSP5	ethyl oleate	0.166
DUSP5	quercetin	0.15
DUSP6	cinnamaldehyde	0.15
DUSP6	ethyl oleate	0.166
DUSP6	quercetin	0.15
DUSP7	ethyl oleate	0.166
DUSP8	ethyl oleate	0.166
DUSP9	ethyl oleate	0.166
DYDC2	quercetin	0.15
DYNLL1	quercetin	0.15
DYNLRB1	cinnamaldehyde	0.15
DYNLT3	quercetin	0.15
DYSF	cinnamaldehyde	0.158
E2F1	quercetin	0.15
E2F2	quercetin	0.15
E2F3	quercetin	0.15
E2F5	quercetin	0.15
E2F6	ellagic acid	0.163
E2F7	quercetin	0.15
E4F1	ellagic acid	0.15
EAF2	cinnamaldehyde	0.15
EAF2	quercetin	0.15
EBP	campesterol	0.38
EBP	sitosterol	0.327
EBP	stigmasterol	0.243
EBPL	campesterol	0.38
EBPL	sitosterol	0.327
EBPL	stigmasterol	0.243
ECD	quercetin	0.15
ECI2	quercetin	0.15
ECT2	quercetin	0.15
EDA2R	quercetin	0.15
EDC3	quercetin	0.15
EDN1	quercetin	0.7
EDNRB	quercetin	0.15
EEF1A1	quercetin	0.8
EEF1A1	sitosterol	0.18
EEF1A2	sitosterol	0.18
EEF1E1	catechin	0.21
EEF1G	catechin	0.21
EFCAB11	quercetin	0.15
EFCAB7	quercetin	0.15
EFCAB8	quercetin	0.15
EFEMP1	quercetin	0.15
EFNA1	quercetin	0.15
EFNA4	quercetin	0.15
EFNB2	quercetin	0.15
EFR3A	quercetin	0.15
EGF	baicalin	0.8
EGF	quercetin	0.249
EGFR	betulinic acid	0.7
EGFR	ellagic acid	0.316
EGFR	quercetin	0.826
EGLN1	quercetin	0.15
EGR1	cinnamaldehyde	0.15
EGR1	quercetin	0.15
EGR2	quercetin	0.15
EGR3	ellagic acid	0.15
EGR3	quercetin	0.15
EGR4	pachymic acid	0.155
EGR4	quercetin	0.15
EHBP1	quercetin	0.15
EHD1	amygdalin	0.231
EHD2	amygdalin	0.231
EHD3	amygdalin	0.231
EHD4	amygdalin	0.231
EHHADH	quercetin	0.15
EI24	quercetin	0.15
EID2B	quercetin	0.15
EID3	quercetin	0.15
EIF1	quercetin	0.15
EIF2A	quercetin	0.7
EIF2AK2	quercetin	0.7
EIF2B2	quercetin	0.15
EIF2C2	quercetin	0.15
EIF2S1	quercetin	0.15
EIF2S2	quercetin	0.15
EIF3M	gibberellin A7	0.313
EIF4A1	quercetin	0.15
EIF4E2	quercetin	0.15
EIF4G1	quercetin	0.16
EIF4G3	quercetin	0.441
EIF5A	baicalein	0.198
EIF5A2	baicalein	0.198
EIF5AL1	baicalein	0.198
EIF6	gibberellin A7	0.201
ELANE	cinnamaldehyde	0.295
ELANE	ellagic acid	0.256
ELF3	quercetin	0.15
ELF4	quercetin	0.15
ELK4	quercetin	0.15
ELL2	quercetin	0.15
ELMOD2	quercetin	0.15
ELOVL1	gibberellin A7	0.169
ELOVL1	quercetin	0.15
ELOVL2	gibberellin A7	0.188
ELOVL3	gibberellin A7	0.159
ELOVL3	quercetin	0.15
ELOVL4	gibberellin A7	0.169
ELOVL5	gibberellin A7	0.188
ELOVL6	gibberellin A7	0.172
ELOVL6	quercetin	0.15
ELOVL7	gibberellin A7	0.169
EMC2	gibberellin A7	0.337
EML2	quercetin	0.15
EMP1	quercetin	0.15
EMP3	quercetin	0.15
EMR2	quercetin	0.238
ENAH	quercetin	0.15
ENDOD1	quercetin	0.15
ENDOG	ellagic acid	0.15
ENO1	quercetin	0.15
ENOSF1	quercetin	0.15
ENOX2	catechin	0.549
ENPEP	amygdalin	0.191
ENPP1	quercetin	0.15
ENPP2	quercetin	0.15
ENPP3	quercetin	0.15
ENSG00000125954	quercetin	0.194
ENSG00000141979	spinasterol	0.21
ENSG00000170276	quercetin	0.237
ENSG00000174093	amygdalin	0.177
ENSG00000183292	ellagic acid	0.256
ENSG00000184761	ellagic acid	0.256
ENSG00000188474	pachymic acid	0.155
ENSG00000196826	pachymic acid	0.155
ENSG00000198580	pachymic acid	0.155
ENSG00000213297	pachymic acid	0.155
ENSG00000219492	pachymic acid	0.155
ENSG00000229631	pachymic acid	0.155
ENSG00000229729	pachymic acid	0.155
ENSG00000232856	catechin	0.21
ENSG00000234857	trametenolic acid	0.186
ENSG00000244255	ellagic acid	0.256
ENSG00000248919	gibberellin A7	0.259
ENSG00000249209	campesterol	0.154
ENSG00000249209	kaempferol	0.154
ENSG00000249209	stigmasterol	0.155
ENSG00000249590	spinasterol	0.271
ENSG00000254553	pachymic acid	0.155
ENSG00000256349	stigmasterol	0.162
ENSG00000256407	campesterol	0.156
ENSG00000256566	pachymic acid	0.155
ENSG00000256825	pachymic acid	0.155
ENSG00000257355	pachymic acid	0.155
ENSG00000258643	quercetin	0.444
ENSG00000258653	cinnamaldehyde	0.153
ENSG00000258677	cinnamaldehyde	0.156
ENSG00000258973	quercetin	0.278
ENSG00000259131	catechin	0.208
ENSG00000259399	cinnamaldehyde	0.184
ENSG00000260170	cinnamaldehyde	0.178
ENSG00000260851	betulinic acid	0.236
ENSG00000260869	pachymic acid	0.155
ENSG00000261459	pachymic acid	0.155
ENSG00000261611	pachymic acid	0.155
ENSG00000261740	quercetin	0.523
ENSG00000267022	pachymic acid	0.155
ENSG00000267157	sitosterol	0.161
ENSG00000267173	pachymic acid	0.155
ENSG00000267179	pachymic acid	0.155
ENSG00000267335	gibberellin A7	0.172
ENSG00000267360	pachymic acid	0.155
ENSG00000267477	pachymic acid	0.155
ENSG00000267552	pachymic acid	0.155
ENSG00000268107	pachymic acid	0.155
ENSG00000268133	pachymic acid	0.155
ENSG00000268163	pachymic acid	0.155
ENSG00000268171	pachymic acid	0.155
ENSG00000268461	pachymic acid	0.155
ENSG00000268643	betulinic acid	0.155
ENSG00000268643	quercetin	0.346
ENSG00000268744	pachymic acid	0.155
ENSG00000268750	pachymic acid	0.155
ENSG00000268870	pachymic acid	0.155
ENSG00000269026	pachymic acid	0.155
ENSG00000269237	pachymic acid	0.155
ENSG00000269533	pachymic acid	0.155
ENSG00000269545	pachymic acid	0.155
ENSG00000269693	pachymic acid	0.155
ENSG00000269741	ellagic acid	0.256
ENSG00000269755	pachymic acid	0.155
ENTPD5	quercetin	0.15
EOGT	quercetin	0.15
EP300	ellagic acid	0.15
EPAS1	cinnamaldehyde	0.15
EPAS1	quercetin	0.15
EPB41L1	quercetin	0.15
EPB41L5	quercetin	0.15
EPB49	cinnamaldehyde	0.15
EPHA1	quercetin	0.278
EPHA10	quercetin	0.278
EPHA2	quercetin	0.368
EPHA3	quercetin	0.278
EPHA4	quercetin	0.278
EPHA5	quercetin	0.278
EPHA6	quercetin	0.278
EPHA7	quercetin	0.278
EPHA8	quercetin	0.278
EPHB1	quercetin	0.278
EPHB2	quercetin	0.278
EPHB3	quercetin	0.278
EPHB4	ellagic acid	0.171
EPHB4	quercetin	0.278
EPHB6	quercetin	0.278
EPM2A	ethyl oleate	0.166
EPN3	quercetin	0.15
EPO	quercetin	0.15
EPS15	ellagic acid	0.15
EPS15	quercetin	0.15
EPS8	quercetin	0.15
EPS8L2	quercetin	0.15
ERAP1	amygdalin	0.191
ERAP2	amygdalin	0.191
ERBB2	quercetin	0.358
ERBB3	quercetin	0.15
ERCC1	quercetin	0.15
ERCC2	taxifolin	0.253
ERCC5	quercetin	0.15
ERCC6L	quercetin	0.15
EREG	quercetin	0.15
ERGIC2	quercetin	0.15
ERH	catechin	0.212
ERN1	quercetin	0.734
ERN2	quercetin	0.734
ERP27	quercetin	0.15
ERP29	quercetin	0.15
ESAM	quercetin	0.15
ESD	amygdalin	0.167
ESF1	ethyl oleate	0.223
ESM1	quercetin	0.15
ESPN	quercetin	0.15
ESR1	kaempferol	0.736
ESR1	quercetin	0.743
ESR2	kaempferol	0.725
ESR2	quercetin	0.726
ETFA	gibberellin A7	0.35
ETFB	quercetin	0.15
ETHE1	catechin	0.208
ETS2	quercetin	0.164
ETV4	quercetin	0.15
EVA1A	quercetin	0.15
EVA1B	quercetin	0.15
EVC	campesterol	0.236
EVC2	campesterol	0.294
EVC2	sitosterol	0.163
EVC2	stigmasterol	0.163
EXOC2	quercetin	0.15
EXOC4	quercetin	0.15
EXOC5	quercetin	0.15
EXOC6	quercetin	0.15
EXOC8	quercetin	0.15
EXOSC10	kaempferol	0.154
EXOSC8	quercetin	0.15
EXOSC9	quercetin	0.15
EXTL2	quercetin	0.15
EZH1	ellagic acid	0.15
EZR	campesterol	0.185
EZR	sitosterol	0.185
F10	ellagic acid	0.195
F10	quercetin	0.15
F11	ellagic acid	0.379
F12	ellagic acid	0.966
F2	cinnamaldehyde	0.178
F2	ellagic acid	0.268
F2	quercetin	0.193
F2R	cinnamaldehyde	0.447
F2R	quercetin	0.15
F2RL1	cinnamaldehyde	0.51
F2RL1	quercetin	0.15
F3	ellagic acid	0.251
F3	quercetin	0.84
F7	ellagic acid	0.195
F7	quercetin	0.15
F8A1	GA120	0.258
F8A2	GA120	0.258
F8A3	GA120	0.258
F9	cinnamaldehyde	0.183
F9	ellagic acid	0.195
FA2H	campesterol	0.169
FA2H	gibberellin A7	0.169
FA2H	sitosterol	0.216
FA2H	stigmasterol	0.173
FABP1	quercetin	0.15
FADD	quercetin	0.15
FADS3	quercetin	0.15
FAH	quercetin	0.15
FAIM	quercetin	0.15
FAM102B	quercetin	0.15
FAM110B	quercetin	0.15
FAM114A1	quercetin	0.15
FAM117A	quercetin	0.15
FAM117B	quercetin	0.15
FAM120C	quercetin	0.15
FAM122B	quercetin	0.15
FAM135A	quercetin	0.15
FAM13A	quercetin	0.15
FAM13B	quercetin	0.15
FAM13C	quercetin	0.15
FAM150B	quercetin	0.15
FAM162A	quercetin	0.15
FAM171A1	quercetin	0.15
FAM174A	quercetin	0.15
FAM175A	quercetin	0.15
FAM177A1	quercetin	0.15
FAM193A	quercetin	0.15
FAM193B	quercetin	0.15
FAM198B	quercetin	0.15
FAM19A4	quercetin	0.15
FAM19A5	quercetin	0.15
FAM208A	quercetin	0.15
FAM209A	quercetin	0.15
FAM209B	quercetin	0.15
FAM212B	quercetin	0.15
FAM222A	quercetin	0.15
FAM228B	quercetin	0.15
FAM3B	quercetin	0.15
FAM46A	quercetin	0.15
FAM46B	quercetin	0.15
FAM46C	quercetin	0.15
FAM50A	quercetin	0.15
FAM53C	quercetin	0.15
FAM54A	quercetin	0.15
FAM59A	quercetin	0.15
FAM83D	quercetin	0.15
FAM98A	quercetin	0.15
FAM98B	quercetin	0.15
FAN1	quercetin	0.15
FANCB	quercetin	0.15
FANCG	quercetin	0.15
FANCL	quercetin	0.15
FARP1	quercetin	0.15
FARP2	quercetin	0.15
FAS	quercetin	0.15
FASLG	quercetin	0.15
FASN	quercetin	0.15
FASTKD1	quercetin	0.15
FASTKD2	quercetin	0.15
FAU	quercetin	0.8
FBLN2	quercetin	0.15
FBP1	kaempferol	0.15
FBP1	quercetin	0.15
FBXL2	quercetin	0.15
FBXL6	quercetin	0.15
FBXO10	quercetin	0.15
FBXO11	quercetin	0.15
FBXO17	quercetin	0.15
FBXO18	taxifolin	0.173
FBXO2	quercetin	0.15
FBXO25	quercetin	0.15
FBXO28	eburicoic acid	0.165
FBXO28	pachymic acid	0.165
FBXO28	quercetin	0.15
FBXO3	quercetin	0.15
FBXO30	quercetin	0.15
FBXO31	quercetin	0.15
FBXO41	quercetin	0.15
FBXO5	quercetin	0.15
FCER1G	quercetin	0.15
FCGR2B	cinnamaldehyde	0.15
FCGR2B	quercetin	0.15
FCHSD2	quercetin	0.15
FDFT1	campesterol	0.168
FDFT1	quercetin	0.15
FDFT1	sitosterol	0.175
FDPS	eburicoic acid	0.168
FDPS	pachymic acid	0.168
FDPS	quercetin	0.15
FDXR	quercetin	0.243
FEM1C	quercetin	0.15
FEM1C	taxifolin	0.165
FEN1	kaempferol	0.163
FER1L6	cinnamaldehyde	0.158
FERMT1	quercetin	0.15
FERMT2	quercetin	0.15
FEZ2	quercetin	0.15
FEZF1	pachymic acid	0.155
FGA	quercetin	0.15
FGB	quercetin	0.15
FGF18	quercetin	0.15
FGF3	taxifolin	0.15
FGF7	quercetin	0.15
FGFBP3	quercetin	0.15
FGFR1	ellagic acid	0.15
FGFR1	quercetin	0.278
FGFR2	cinnamaldehyde	0.15
FGFR2	quercetin	0.278
FGFR3	quercetin	0.368
FGFR4	quercetin	0.368
FGFRL1	quercetin	0.278
FGG	quercetin	0.15
FGL2	quercetin	0.15
FGR	quercetin	0.505
FH	quercetin	0.15
FHIT	quercetin	0.15
FIG4	quercetin	0.15
FIGF	gibberellin A7	0.325
FIGF	quercetin	0.15
FIGN	cinnamaldehyde	0.168
[truncated: 4,039 more rows]

## Sheet: Suppl Table 3
Table S3. List of atherosclerosis related genes in the GeneCard database
No.	Symbol	Description	Category	GIFtS	GC id	Score ▼
1	APOE	Apolipoprotein E	Protein Coding	52	GC19P044906	66.58
2	APOB	Apolipoprotein B	Protein Coding	45	GC02M020956	50.74
3	APOA1	Apolipoprotein A1	Protein Coding	50	GC11M116835	49.41
4	LDLR	Low Density Lipoprotein Receptor	Protein Coding	50	GC19P011061	47.14
5	ABCA1	ATP Binding Cassette Subfamily A Member 1	Protein Coding	49	GC09M104781	44.68
6	LPL	Lipoprotein Lipase	Protein Coding	51	GC08P019901	39.51
7	PPARG	Peroxisome Proliferator Activated Receptor Gamma	Protein Coding	54	GC03P012287	39.36
8	LIPC	Lipase C, Hepatic Type	Protein Coding	46	GC15P058410	39.35
9	ABCG5	ATP Binding Cassette Subfamily G Member 5	Protein Coding	44	GC02M043806	38.98
10	CETP	Cholesteryl Ester Transfer Protein	Protein Coding	48	GC16P056961	37.91
11	ABCG8	ATP Binding Cassette Subfamily G Member 8	Protein Coding	43	GC02P043828	37.11
12	LMNA	Lamin A/C	Protein Coding	49	GC01P156082	36.54
13	PCSK9	Proprotein Convertase Subtilisin/Kexin Type 9	Protein Coding	52	GC01P055039	34.75
14	LCAT	Lecithin-Cholesterol Acyltransferase	Protein Coding	48	GC16M067939	33.17
15	OLR1	Oxidized Low Density Lipoprotein Receptor 1	Protein Coding	45	GC12M013371	30.93
16	ALB	Albumin	Protein Coding	51	GC04P073397	30.65
17	CCL2	C-C Motif Chemokine Ligand 2	Protein Coding	50	GC17P034255	30.44
18	APOA2	Apolipoprotein A2	Protein Coding	45	GC01M161222	30.21
19	CRP	C-Reactive Protein	Protein Coding	48	GC01M159715	29.83
20	ELN	Elastin	Protein Coding	45	GC07P074027	28.25
21	SELE	Selectin E	Protein Coding	45	GC01M169722	28.12
22	LPA	Lipoprotein(A)	Protein Coding	41	GC06M160531	26.02
23	APOC3	Apolipoprotein C3	Protein Coding	44	GC11P116829	25.8
24	CYP7A1	Cytochrome P450 Family 7 Subfamily A Member 1	Protein Coding	43	GC08M058476	25.12
25	VEGFA	Vascular Endothelial Growth Factor A	Protein Coding	51	GC06P043770	24.92
26	MMP9	Matrix Metallopeptidase 9	Protein Coding	54	GC20P046008	24.49
27	NOS3	Nitric Oxide Synthase 3	Protein Coding	52	GC07P150990	24.34
28	IL6	Interleukin 6	Protein Coding	51	GC07P022765	24.11
29	ACE	Angiotensin I Converting Enzyme	Protein Coding	51	GC17P063477	23.86
30	ADIPOQ	Adiponectin, C1Q And Collagen Domain Containing	Protein Coding	47	GC03P186842	23.81
31	PON1	Paraoxonase 1	Protein Coding	47	GC07M095297	23.69
32	LDLRAP1	Low Density Lipoprotein Receptor Adaptor Protein 1	Protein Coding	43	GC01P025574	23
33	APOA5	Apolipoprotein A5	Protein Coding	44	GC11M116789	22.81
34	TNF	Tumor Necrosis Factor	Protein Coding	53	GC06P033397	22.76
35	INS	Insulin	Protein Coding	50	GC11M002159	22.69
36	HMGCR	3-Hydroxy-3-Methylglutaryl-CoA Reductase	Protein Coding	47	GC05P075336	22.24
37	VCAM1	Vascular Cell Adhesion Molecule 1	Protein Coding	47	GC01P100719	22.24
38	WRN	WRN RecQ Like Helicase	Protein Coding	47	GC08P031033	22.11
39	CX3CR1	C-X3-C Motif Chemokine Receptor 1	Protein Coding	46	GC03M039279	21.08
40	ICAM1	Intercellular Adhesion Molecule 1	Protein Coding	52	GC19P010270	20.49
41	SERPINE1	Serpin Family E Member 1	Protein Coding	52	GC07P101127	20.46
42	IL10	Interleukin 10	Protein Coding	49	GC01M206767	20.42
43	THBD	Thrombomodulin	Protein Coding	45	GC20M023026	20.05
44	ATHS	Atherosclerosis Susceptibility (Lipoprotein Associated)	Genetic Locus	5	GC19U990005	19.78
45	EDN1	Endothelin 1	Protein Coding	48	GC06P012290	19.46
46	MTHFR	Methylenetetrahydrofolate Reductase	Protein Coding	48	GC01M011785	19.46
47	PPARA	Peroxisome Proliferator Activated Receptor Alpha	Protein Coding	47	GC22P046150	19.23
48	AGER	Advanced Glycosylation End-Product Specific Receptor	Protein Coding	45	GC06M032180	19.23
49	PLA2G7	Phospholipase A2 Group VII	Protein Coding	51	GC06M046704	19.11
50	ESR1	Estrogen Receptor 1	Protein Coding	55	GC06P151656	19.1
51	PLAT	Plasminogen Activator, Tissue Type	Protein Coding	51	GC08M042174	19.03
52	APOC2	Apolipoprotein C2	Protein Coding	46	GC19P044945	18.59
53	SCARB1	Scavenger Receptor Class B Member 1	Protein Coding	47	GC12M124776	18.48
54	SELP	Selectin P	Protein Coding	47	GC01M169558	18.41
55	SPP1	Secreted Phosphoprotein 1	Protein Coding	48	GC04P087975	18.32
56	TLR4	Toll Like Receptor 4	Protein Coding	52	GC09P117704	18.22
57	CYP27A1	Cytochrome P450 Family 27 Subfamily A Member 1	Protein Coding	48	GC02P218781	18.05
58	VWF	Von Willebrand Factor	Protein Coding	50	GC12M005917	17.59
59	LEP	Leptin	Protein Coding	49	GC07P128241	17.56
60	MPO	Myeloperoxidase	Protein Coding	51	GC17M058269	17.21
61	PLTP	Phospholipid Transfer Protein	Protein Coding	44	GC20M045898	17.14
62	MYH11	Myosin Heavy Chain 11	Protein Coding	47	GC16M015704	17.12
63	ENG	Endoglin	Protein Coding	48	GC09M127815	16.98
64	TP53	Tumor Protein P53	Protein Coding	55	GC17M007661	16.95
65	IL1B	Interleukin 1 Beta	Protein Coding	50	GC02M112829	16.5
66	ZMPSTE24	Zinc Metallopeptidase STE24	Protein Coding	44	GC01P040258	16.27
67	COG2	Component Of Oligomeric Golgi Complex 2	Protein Coding	41	GC01P230642	15.56
68	RETN	Resistin	Protein Coding	45	GC19P007669	15.53
69	ACTA2	Actin Alpha 2, Smooth Muscle	Protein Coding	49	GC10M088935	15.5
70	ABCG1	ATP Binding Cassette Subfamily G Member 1	Protein Coding	45	GC21P042199	15.47
71	LOX	Lysyl Oxidase	Protein Coding	46	GC05M122063	15.43
72	IL18	Interleukin 18	Protein Coding	45	GC11M112143	15.41
73	AGTR1	Angiotensin II Receptor Type 1	Protein Coding	51	GC03P148697	15.35
74	F3	Coagulation Factor III, Tissue Factor	Protein Coding	47	GC01M094530	15.31
75	LIPA	Lipase A, Lysosomal Acid Type	Protein Coding	48	GC10M089213	15.13
76	CYBA	Cytochrome B-245 Alpha Chain	Protein Coding	47	GC16M088643	14.91
77	NAMPT	Nicotinamide Phosphoribosyltransferase	Protein Coding	50	GC07M106248	14.78
78	FBN1	Fibrillin 1	Protein Coding	47	GC15M048408	14.62
79	ALOX5	Arachidonate 5-Lipoxygenase	Protein Coding	50	GC10P045374	14.59
80	MSR1	Macrophage Scavenger Receptor 1	Protein Coding	47	GC08M016107	14.51
81	CAT	Catalase	Protein Coding	51	GC11P034460	14.46
82	PON2	Paraoxonase 2	Protein Coding	44	GC07M095404	14.44
83	ENPP1	Ectonucleotide Pyrophosphatase/Phosphodiesterase 1	Protein Coding	47	GC06P131808	14.44
84	BANF1	BAF Nuclear Assembly Factor 1	Protein Coding	43	GC11P066002	14.42
85	SOAT1	Sterol O-Acyltransferase 1	Protein Coding	45	GC01P179262	14.22
86	MMP3	Matrix Metallopeptidase 3	Protein Coding	52	GC11M102835	14.19
87	ITGB3	Integrin Subunit Beta 3	Protein Coding	51	GC17P047254	14.14
88	TGFB2	Transforming Growth Factor Beta 2	Protein Coding	51	GC01P218345	14.12
89	CXCL8	C-X-C Motif Chemokine Ligand 8	Protein Coding	43	GC04P073740	14.11
90	NOTCH3	Notch Receptor 3	Protein Coding	50	GC19M015159	14.03
91	TGFB1	Transforming Growth Factor Beta 1	Protein Coding	54	GC19M041301	13.99
92	TGFB3	Transforming Growth Factor Beta 3	Protein Coding	48	GC14M075958	13.95
93	HSPD1	Heat Shock Protein Family D (Hsp60) Member 1	Protein Coding	49	GC02M197486	13.87
94	MMP2	Matrix Metallopeptidase 2	Protein Coding	55	GC16P055390	13.81
95	PON3	Paraoxonase 3	Protein Coding	45	GC07M095359	13.75
96	FABP4	Fatty Acid Binding Protein 4	Protein Coding	46	GC08M081478	13.68
97	CDKN2B-AS1	CDKN2B Antisense RNA 1	RNA Gene	22	GC09P021994	13.64
98	AGPAT2	1-Acylglycerol-3-Phosphate O-Acyltransferase 2	Protein Coding	47	GC09M136673	13.57
99	TGFBR1	Transforming Growth Factor Beta Receptor 1	Protein Coding	54	GC09P099104	13.5
100	SMAD3	SMAD Family Member 3	Protein Coding	50	GC15P067063	13.27
101	F2	Coagulation Factor II, Thrombin	Protein Coding	50	GC11P046720	13.05
102	MYLK	Myosin Light Chain Kinase	Protein Coding	54	GC03M123610	13.05
103	KCNJ5	Potassium Inwardly Rectifying Channel Subfamily J Member 5	Protein Coding	48	GC11P128891	12.86
104	NBN	Nibrin	Protein Coding	49	GC08M089933	12.73
105	COL3A1	Collagen Type III Alpha 1 Chain	Protein Coding	48	GC02P188974	12.68
106	NOTCH1	Notch Receptor 1	Protein Coding	52	GC09M136582	12.64
107	TIMP1	TIMP Metallopeptidase Inhibitor 1	Protein Coding	47	GC0XP047583	12.61
108	BSCL2	BSCL2 Lipid Droplet Biogenesis Associated, Seipin	Protein Coding	43	GC11M063080	12.61
109	PECAM1	Platelet And Endothelial Cell Adhesion Molecule 1	Protein Coding	41	GC17M064319	12.58
110	FOS	Fos Proto-Oncogene, AP-1 Transcription Factor Subunit	Protein Coding	52	GC14P075278	12.54
111	TNFRSF11B	TNF Receptor Superfamily Member 11b	Protein Coding	49	GC08M118923	12.38
112	CAV1	Caveolin 1	Protein Coding	50	GC07P116524	12.33
113	LIPG	Lipase G, Endothelial Type	Protein Coding	44	GC18P049560	12.32
114	SREBF2	Sterol Regulatory Element Binding Transcription Factor 2	Protein Coding	44	GC22P041833	12.18
115	HMOX1	Heme Oxygenase 1	Protein Coding	54	GC22P035380	12.17
116	NPC1	NPC Intracellular Cholesterol Transporter 1	Protein Coding	48	GC18M023506	12.17
117	MIR126	MicroRNA 126	RNA Gene	23	GC09P136670	12.12
118	TNFSF4	TNF Superfamily Member 4	Protein Coding	42	GC01M173183	12.08
119	TGFBR2	Transforming Growth Factor Beta Receptor 2	Protein Coding	54	GC03P030623	12.01
120	MIR155	MicroRNA 155	RNA Gene	19	GC21P025573	12
121	AKT1	AKT Serine/Threonine Kinase 1	Protein Coding	56	GC14M104769	11.89
122	CST3	Cystatin C	Protein Coding	45	GC20M023608	11.87
123	IFNG	Interferon Gamma	Protein Coding	50	GC12M068064	11.83
124	F5	Coagulation Factor V	Protein Coding	46	GC01M169511	11.7
125	SERPINC1	Serpin Family C Member 1	Protein Coding	49	GC01M174131	11.67
126	ANGPTL3	Angiopoietin Like 3	Protein Coding	45	GC01P062597	11.59
127	CAVIN1	Caveolae Associated Protein 1	Protein Coding	33	GC17M042404	11.48
128	LRP1	LDL Receptor Related Protein 1	Protein Coding	48	GC12P057128	11.46
129	PRKG1	Protein Kinase CGMP-Dependent 1	Protein Coding	52	GC10P050991	11.35
130	AGT	Angiotensinogen	Protein Coding	51	GC01M230702	11.13
131	MAT2A	Methionine Adenosyltransferase 2A	Protein Coding	48	GC02P085538	11.12
132	MFAP5	Microfibril Associated Protein 5	Protein Coding	43	GC12M008637	11.12
133	EPHX2	Epoxide Hydrolase 2	Protein Coding	49	GC08P027490	11.07
134	MIR21	MicroRNA 21	RNA Gene	24	GC17P059841	10.93
135	MAPK14	Mitogen-Activated Protein Kinase 14	Protein Coding	53	GC06P046047	10.87
136	PTGS2	Prostaglandin-Endoperoxide Synthase 2	Protein Coding	50	GC01M186640	10.86
137	CD40LG	CD40 Ligand	Protein Coding	49	GC0XP136649	10.77
138	MAPT	Microtubule Associated Protein Tau	Protein Coding	52	GC17P045894	10.64
139	MMP1	Matrix Metallopeptidase 1	Protein Coding	53	GC11M102810	10.54
140	ITGAM	Integrin Subunit Alpha M	Protein Coding	48	GC16P031420	10.48
141	F13A1	Coagulation Factor XIII A Chain	Protein Coding	47	GC06M006144	10.47
142	LTA	Lymphotoxin Alpha	Protein Coding	43	GC06P033395	10.3
143	IGF1	Insulin Like Growth Factor 1	Protein Coding	50	GC12M102395	10.29
144	SLC2A10	Solute Carrier Family 2 Member 10	Protein Coding	45	GC20P046709	10.29
145	TNNT2	Troponin T2, Cardiac Type	Protein Coding	49	GC01M201359	10.27
146	NR1H2	Nuclear Receptor Subfamily 1 Group H Member 2	Protein Coding	49	GC19P050329	10.26
147	TREX1	Three Prime Repair Exonuclease 1	Protein Coding	44	GC03P048466	10.19
148	FGB	Fibrinogen Beta Chain	Protein Coding	47	GC04P154564	10.19
149	CLU	Clusterin	Protein Coding	48	GC08M027596	10.01
150	GGCX	Gamma-Glutamyl Carboxylase	Protein Coding	47	GC02M085544	9.95
151	CD14	CD14 Molecule	Protein Coding	46	GC05M140631	9.95
152	ABCC6	ATP Binding Cassette Subfamily C Member 6	Protein Coding	46	GC16M016148	9.95
153	VCL	Vinculin	Protein Coding	49	GC10P073995	9.94
154	SORL1	Sortilin Related Receptor 1	Protein Coding	44	GC11P121452	9.89
155	SAA1	Serum Amyloid A1	Protein Coding	43	GC11P018267	9.78
156	NR1H4	Nuclear Receptor Subfamily 1 Group H Member 4	Protein Coding	50	GC12P100473	9.76
157	NOS2	Nitric Oxide Synthase 2	Protein Coding	51	GC17M027756	9.72
158	MIR208A	MicroRNA 208a	RNA Gene	19	GC14M023388	9.69
159	RHOA	Ras Homolog Family Member A	Protein Coding	48	GC03M049359	9.67
160	APOH	Apolipoprotein H	Protein Coding	45	GC17M066212	9.62
161	NPPB	Natriuretic Peptide B	Protein Coding	45	GC01M011858	9.57
162	REN	Renin	Protein Coding	50	GC01M204154	9.57
163	KNG1	Kininogen 1	Protein Coding	45	GC03P186717	9.54
164	PF4	Platelet Factor 4	Protein Coding	43	GC04M073980	9.52
165	SOD1	Superoxide Dismutase 1	Protein Coding	54	GC21P031659	9.45
166	XYLT2	Xylosyltransferase 2	Protein Coding	47	GC17P050347	9.44
167	XYLT1	Xylosyltransferase 1	Protein Coding	43	GC16M017101	9.44
168	TUG1	Taurine Up-Regulated 1	RNA Gene	24	GC22P030969	9.38
169	SMAD4	SMAD Family Member 4	Protein Coding	52	GC18P051028	9.34
170	CBS	Cystathionine Beta-Synthase	Protein Coding	50	GC21M043053	9.34
171	NFKB1	Nuclear Factor Kappa B Subunit 1	Protein Coding	54	GC04P102501	9.32
172	F7	Coagulation Factor VII	Protein Coding	48	GC13P113105	9.32
173	PSEN1	Presenilin 1	Protein Coding	53	GC14P073136	9.31
174	GHR	Growth Hormone Receptor	Protein Coding	48	GC05P042429	9.31
175	TNFRSF1A	TNF Receptor Superfamily Member 1A	Protein Coding	51	GC12M006328	9.28
176	PSEN2	Presenilin 2	Protein Coding	51	GC01P226870	9.27
177	APP	Amyloid Beta Precursor Protein	Protein Coding	52	GC21M025880	9.27
178	MIR145	MicroRNA 145	RNA Gene	22	GC05P149430	9.22
179	TNXB	Tenascin XB	Protein Coding	45	GC06M032383	9.16
180	CD40	CD40 Molecule	Protein Coding	50	GC20P046118	9.13
181	ABCC9	ATP Binding Cassette Subfamily C Member 9	Protein Coding	46	GC12M021797	9.12
182	IGFBP3	Insulin Like Growth Factor Binding Protein 3	Protein Coding	47	GC07M045912	9.09
183	SOD2	Superoxide Dismutase 2	Protein Coding	52	GC06M159669	9.09
184	ALMS1	ALMS1 Centrosome And Basal Body Associated Protein	Protein Coding	41	GC02P073385	9.06
185	NFE2L2	Nuclear Factor, Erythroid 2 Like 2	Protein Coding	49	GC02M177227	9.06
186	SOAT2	Sterol O-Acyltransferase 2	Protein Coding	45	GC12P053103	9.04
187	SMPD1	Sphingomyelin Phosphodiesterase 1	Protein Coding	49	GC11P006390	9.04
188	SIRT1	Sirtuin 1	Protein Coding	51	GC10P067884	9.02
189	HLA-DRB1	Major Histocompatibility Complex, Class II, DR Beta 1	Protein Coding	47	GC06M032578	9.01
190	AKT2	AKT Serine/Threonine Kinase 2	Protein Coding	56	GC19M040230	8.99
191	PIK3CG	Phosphatidylinositol-4,5-Bisphosphate 3-Kinase Catalytic Subunit Gamma	Protein Coding	49	GC07P106865	8.99
192	CDH5	Cadherin 5	Protein Coding	48	GC16P066366	8.97
193	GGT1	Gamma-Glutamyltransferase 1	Protein Coding	48	GC22P024583	8.93
194	IL17A	Interleukin 17A	Protein Coding	44	GC06P052186	8.89
195	PPBP	Pro-Platelet Basic Protein	Protein Coding	45	GC04M073986	8.88
196	PDGFB	Platelet Derived Growth Factor Subunit B	Protein Coding	51	GC22M044780	8.86
197	STAT3	Signal Transducer And Activator Of Transcription 3	Protein Coding	54	GC17M042313	8.79
198	APOA4	Apolipoprotein A4	Protein Coding	43	GC11M116820	8.71
199	NPC2	NPC Intracellular Cholesterol Transporter 2	Protein Coding	43	GC14M074476	8.66
200	GPT	Glutamic--Pyruvic Transaminase	Protein Coding	42	GC08P144502	8.63
201	CX3CL1	C-X3-C Motif Chemokine Ligand 1	Protein Coding	44	GC16P057372	8.59
202	PTX3	Pentraxin 3	Protein Coding	43	GC03P157436	8.55
203	HP	Haptoglobin	Protein Coding	45	GC16P072089	8.53
204	IL1R1	Interleukin 1 Receptor Type 1	Protein Coding	47	GC02P102136	8.52
205	CDKN2A	Cyclin Dependent Kinase Inhibitor 2A	Protein Coding	52	GC09M021967	8.52
206	NR1H3	Nuclear Receptor Subfamily 1 Group H Member 3	Protein Coding	48	GC11P047248	8.51
207	CD163	CD163 Molecule	Protein Coding	44	GC12M007471	8.5
208	SLC17A5	Solute Carrier Family 17 Member 5	Protein Coding	45	GC06M073593	8.49
209	MIR499A	MicroRNA 499a	RNA Gene	22	GC20P034990	8.48
210	MIR33A	MicroRNA 33a	RNA Gene	19	GC22P041900	8.4
211	TLR2	Toll Like Receptor 2	Protein Coding	52	GC04P153684	8.39
212	CFH	Complement Factor H	Protein Coding	47	GC01P196621	8.39
213	TXN	Thioredoxin	Protein Coding	47	GC09M110243	8.37
214	CXCL12	C-X-C Motif Chemokine Ligand 12	Protein Coding	47	GC10M044370	8.37
215	H19	H19 Imprinted Maternally Expressed Transcript	RNA Gene	28	GC11M001995	8.33
216	TP53COR1	Tumor Protein P53 Pathway Corepressor 1	RNA Gene	9	GC06U903133	8.29
217	MGP	Matrix Gla Protein	Protein Coding	43	GC12M014881	8.28
218	PTPN22	Protein Tyrosine Phosphatase Non-Receptor Type 22	Protein Coding	48	GC01M113813	8.23
219	CCR5	C-C Motif Chemokine Receptor 5 (Gene/Pseudogene)	Protein Coding	48	GC03P046384	8.2
220	CEP19	Centrosomal Protein 19	Protein Coding	35	GC03M196706	8.19
221	MIR146A	MicroRNA 146a	RNA Gene	24	GC05P160485	8.15
222	MAPK8	Mitogen-Activated Protein Kinase 8	Protein Coding	51	GC10P048306	8.14
223	SCN5A	Sodium Voltage-Gated Channel Alpha Subunit 5	Protein Coding	51	GC03M038549	8.12
224	KDR	Kinase Insert Domain Receptor	Protein Coding	55	GC04M055078	8.09
225	SREBF1	Sterol Regulatory Element Binding Transcription Factor 1	Protein Coding	45	GC17M017810	8.06
226	C4A	Complement C4A (Rodgers Blood Group)	Protein Coding	44	GC06P033433	8.05
227	HELLS	Helicase, Lymphoid Specific	Protein Coding	45	GC10P094501	7.94
228	RAC1	Rac Family Small GTPase 1	Protein Coding	51	GC07P006380	7.93
229	PDCD1	Programmed Cell Death 1	Protein Coding	49	GC02M241849	7.92
230	IL4	Interleukin 4	Protein Coding	48	GC05P132673	7.91
231	PTGS1	Prostaglandin-Endoperoxide Synthase 1	Protein Coding	48	GC09P122370	7.91
232	FMR1	FMRP Translational Regulator 1	Protein Coding	46	GC0XP147912	7.89
233	TNIP1	TNFAIP3 Interacting Protein 1	Protein Coding	42	GC05M151029	7.89
234	PPP1R17	Protein Phosphatase 1 Regulatory Subunit 17	Protein Coding	37	GC07P031726	7.89
235	MIR92B	MicroRNA 92b	RNA Gene	17	GC01P155195	7.89
236	CTNNB1	Catenin Beta 1	Protein Coding	54	GC03P041236	7.87
237	TNNI3	Troponin I3, Cardiac Type	Protein Coding	50	GC19M055151	7.86
238	MIAT	Myocardial Infarction Associated Transcript	RNA Gene	22	GC22P026646	7.82
239	IL1RN	Interleukin 1 Receptor Antagonist	Protein Coding	50	GC02P114906	7.81
240	EDNRA	Endothelin Receptor Type A	Protein Coding	50	GC04P147480	7.79
241	ZNF687	Zinc Finger Protein 687	Protein Coding	39	GC01P151281	7.79
242	FOXE3	Forkhead Box E3	Protein Coding	37	GC01P047416	7.79
243	NPY	Neuropeptide Y	Protein Coding	47	GC07P024290	7.78
244	MYH7	Myosin Heavy Chain 7	Protein Coding	48	GC14M023412	7.78
245	CTLA4	Cytotoxic T-Lymphocyte Associated Protein 4	Protein Coding	47	GC02P203867	7.78
246	MIR210	MicroRNA 210	RNA Gene	21	GC11M000622	7.77
247	TIMP2	TIMP Metallopeptidase Inhibitor 2	Protein Coding	45	GC17M078852	7.76
248	FGA	Fibrinogen Alpha Chain	Protein Coding	48	GC04M154583	7.74
249	NOX1	NADPH Oxidase 1	Protein Coding	43	GC0XM100843	7.72
250	ATM	ATM Serine/Threonine Kinase	Protein Coding	55	GC11P108222	7.71
251	CELA2A	Chymotrypsin Like Elastase 2A	Protein Coding	40	GC01P015456	7.71
252	HTR2A	5-Hydroxytryptamine Receptor 2A	Protein Coding	49	GC13M046831	7.7
253	MIR33B	MicroRNA 33b	RNA Gene	19	GC17M017813	7.65
254	CP	Ceruloplasmin	Protein Coding	49	GC03M149162	7.65
255	PDE4D	Phosphodiesterase 4D	Protein Coding	50	GC05M058969	7.65
256	GPX1	Glutathione Peroxidase 1	Protein Coding	49	GC03M049370	7.64
257	GJA4	Gap Junction Protein Alpha 4	Protein Coding	44	GC01P034792	7.6
258	MAPK1	Mitogen-Activated Protein Kinase 1	Protein Coding	52	GC22M021754	7.55
259	BGN	Biglycan	Protein Coding	44	GC0XP153494	7.51
260	H2AX	H2A.X Variant Histone	Protein Coding	37	GC11M119097	7.51
261	HULC	Hepatocellular Carcinoma Up-Regulated Long Non-Coding RNA	RNA Gene	21	GC06P008438	7.51
262	CD36	CD36 Molecule	Protein Coding	50	GC07P080369	7.5
263	ABCG4	ATP Binding Cassette Subfamily G Member 4	Protein Coding	41	GC11P119150	7.49
264	HOXC-AS1	HOXC Cluster Antisense RNA 1	RNA Gene	17	GC12M053999	7.46
265	NFIA-AS1	NFIA Antisense RNA 1	RNA Gene	16	GC01M061248	7.46
266	ERCC6	ERCC Excision Repair 6, Chromatin Remodeling Factor	Protein Coding	46	GC10M049454	7.45
267	ANXA5	Annexin A5	Protein Coding	48	GC04M121667	7.44
268	CSF1	Colony Stimulating Factor 1	Protein Coding	45	GC01P109911	7.42
269	CDKN2B	Cyclin Dependent Kinase Inhibitor 2B	Protein Coding	48	GC09M022002	7.4
270	STAT4	Signal Transducer And Activator Of Transcription 4	Protein Coding	47	GC02M191029	7.36
271	CXCR4	C-X-C Motif Chemokine Receptor 4	Protein Coding	54	GC02M136114	7.36
272	ACVRL1	Activin A Receptor Like Type 1	Protein Coding	51	GC12P051906	7.33
273	BRCA1	BRCA1 DNA Repair Associated	Protein Coding	52	GC17M043044	7.28
274	HMGB1	High Mobility Group Box 1	Protein Coding	45	GC13M030456	7.27
275	CTSL	Cathepsin L	Protein Coding	48	GC09P087725	7.25
276	PDGFA	Platelet Derived Growth Factor Subunit A	Protein Coding	45	GC07M000497	7.23
277	COMT	Catechol-O-Methyltransferase	Protein Coding	52	GC22P019941	7.21
278	SOD3	Superoxide Dismutase 3	Protein Coding	40	GC04P024798	7.2
279	LCN2	Lipocalin 2	Protein Coding	45	GC09P128149	7.2
280	PRKDC	Protein Kinase, DNA-Activated, Catalytic Subunit	Protein Coding	51	GC08M047773	7.19
281	MEF2C	Myocyte Enhancer Factor 2C	Protein Coding	50	GC05M088718	7.12
282	CCL5	C-C Motif Chemokine Ligand 5	Protein Coding	45	GC17M035871	7.12
283	DCN	Decorin	Protein Coding	48	GC12M091140	7.12
284	IRAK1	Interleukin 1 Receptor Associated Kinase 1	Protein Coding	51	GC0XM154010	7.11
285	SHBG	Sex Hormone Binding Globulin	Protein Coding	43	GC17P007613	7.11
286	RARRES2	Retinoic Acid Receptor Responder 2	Protein Coding	41	GC07M150333	7.09
287	ADRB2	Adrenoceptor Beta 2	Protein Coding	50	GC05P148825	7.05
288	FCGR2A	Fc Fragment Of IgG Receptor IIa	Protein Coding	47	GC01P161505	7.05
289	CCR2	C-C Motif Chemokine Receptor 2	Protein Coding	47	GC03P046356	7.04
290	DNASE1	Deoxyribonuclease 1	Protein Coding	43	GC16P003611	7.02
291	TNFAIP3	TNF Alpha Induced Protein 3	Protein Coding	49	GC06P137866	7.02
292	AHSG	Alpha 2-HS Glycoprotein	Protein Coding	45	GC03P186612	7.01
293	ALOX5AP	Arachidonate 5-Lipoxygenase Activating Protein	Protein Coding	45	GC13P030713	7
294	SQSTM1	Sequestosome 1	Protein Coding	50	GC05P179806	6.99
295	PARP1	Poly(ADP-Ribose) Polymerase 1	Protein Coding	51	GC01M226360	6.98
296	HGF	Hepatocyte Growth Factor	Protein Coding	53	GC07M081699	6.96
297	NR1I2	Nuclear Receptor Subfamily 1 Group I Member 2	Protein Coding	46	GC03P119780	6.95
298	APOL1	Apolipoprotein L1	Protein Coding	43	GC22P036253	6.94
299	IL2	Interleukin 2	Protein Coding	47	GC04M122451	6.93
300	MTTP	Microsomal Triglyceride Transfer Protein	Protein Coding	46	GC04P099563	6.92
301	APLN	Apelin	Protein Coding	39	GC0XM129645	6.91
302	H2AC18	H2A Clustered Histone 18	Protein Coding	27	GC01M149914	6.84
303	ENSG00000247287		RNA Gene	9	GC14M061298	6.84
304	NR3C1	Nuclear Receptor Subfamily 3 Group C Member 1	Protein Coding	51	GC05M143277	6.8
305	TAGLN	Transgelin	Protein Coding	43	GC11P117199	6.8
306	HSPA4	Heat Shock Protein Family A (Hsp70) Member 4	Protein Coding	43	GC05P133051	6.79
307	SRC	SRC Proto-Oncogene, Non-Receptor Tyrosine Kinase	Protein Coding	53	GC20P037344	6.79
308	UCP1	Uncoupling Protein 1	Protein Coding	45	GC04M140559	6.71
309	MMP8	Matrix Metallopeptidase 8	Protein Coding	48	GC11M102617	6.71
310	GHRL	Ghrelin And Obestatin Prepropeptide	Protein Coding	44	GC03M010285	6.69
311	MIR17	MicroRNA 17	RNA Gene	21	GC13P091350	6.67
312	PLG	Plasminogen	Protein Coding	49	GC06P160702	6.66
313	SERPIND1	Serpin Family D Member 1	Protein Coding	47	GC22P020810	6.64
314	CASR	Calcium Sensing Receptor	Protein Coding	52	GC03P122183	6.6
315	ITGA2B	Integrin Subunit Alpha 2b	Protein Coding	52	GC17M044380	6.58
316	GCLM	Glutamate-Cysteine Ligase Modifier Subunit	Protein Coding	43	GC01M093885	6.56
317	TERF2	Telomeric Repeat Binding Factor 2	Protein Coding	41	GC16M069355	6.56
318	BMPR2	Bone Morphogenetic Protein Receptor Type 2	Protein Coding	51	GC02P202376	6.55
319	HNF4A	Hepatocyte Nuclear Factor 4 Alpha	Protein Coding	52	GC20P044355	6.54
320	STAT1	Signal Transducer And Activator Of Transcription 1	Protein Coding	55	GC02M190964	6.53
321	HFE	Homeostatic Iron Regulator	Protein Coding	45	GC06P026087	6.53
322	APOA1-AS	APOA1 Antisense RNA	RNA Gene	13	GC11P116836	6.51
323	ETS1	ETS Proto-Oncogene 1, Transcription Factor	Protein Coding	51	GC11M128458	6.49
324	MIF	Macrophage Migration Inhibitory Factor	Protein Coding	51	GC22P023894	6.46
325	CYP2C9	Cytochrome P450 Family 2 Subfamily C Member 9	Protein Coding	50	GC10P094938	6.45
326	VCP	Valosin Containing Protein	Protein Coding	50	GC09M035056	6.45
327	MYH6	Myosin Heavy Chain 6	Protein Coding	47	GC14M023380	6.45
328	AAT1	Aortic Aneurysm, Familial Thoracic 1	Genetic Locus	4	GC11U900016	6.45
329	AAT2	Aortic Aneurysm, Familial Thoracic 2	Genetic Locus	3	GC05U990187	6.45
330	MMP12	Matrix Metallopeptidase 12	Protein Coding	45	GC11M102862	6.44
331	GSTT1	Glutathione S-Transferase Theta 1	Protein Coding	35	GC22Mi00270	6.43
332	UTS2	Urotensin 2	Protein Coding	42	GC01M007904	6.43
333	TFPI	Tissue Factor Pathway Inhibitor	Protein Coding	46	GC02M187464	6.43
334	JUN	Jun Proto-Oncogene, AP-1 Transcription Factor Subunit	Protein Coding	51	GC01M058780	6.42
335	NPPC	Natriuretic Peptide C	Protein Coding	41	GC02M231921	6.42
336	PNLIP	Pancreatic Lipase	Protein Coding	48	GC10P116545	6.39
337	XRCC6	X-Ray Repair Cross Complementing 6	Protein Coding	47	GC22P041622	6.38
338	XRCC5	X-Ray Repair Cross Complementing 5	Protein Coding	45	GC02P216107	6.38
339	ACE2	Angiotensin I Converting Enzyme 2	Protein Coding	50	GC0XM015494	6.38
340	MEF2A	Myocyte Enhancer Factor 2A	Protein Coding	48	GC15P099565	6.37
341	ABCA12	ATP Binding Cassette Subfamily A Member 12	Protein Coding	43	GC02M214931	6.36
342	TIMP3	TIMP Metallopeptidase Inhibitor 3	Protein Coding	47	GC22P032800	6.35
343	GSTM1	Glutathione S-Transferase Mu 1	Protein Coding	43	GC01P109687	6.35
344	NOS1	Nitric Oxide Synthase 1	Protein Coding	50	GC12M117208	6.35
345	DNAH8	Dynein Axonemal Heavy Chain 8	Protein Coding	38	GC06P046078	6.35
346	PAPPA	Pappalysin 1	Protein Coding	42	GC09P116171	6.32
347	GSTA4	Glutathione S-Transferase Alpha 4	Protein Coding	43	GC06M052977	6.31
348	RAF1	Raf-1 Proto-Oncogene, Serine/Threonine Kinase	Protein Coding	56	GC03M012583	6.31
349	FAS	Fas Cell Surface Death Receptor	Protein Coding	52	GC10P088969	6.27
350	FNDC5	Fibronectin Type III Domain Containing 5	Protein Coding	35	GC01M032864	6.27
351	CSF3	Colony Stimulating Factor 3	Protein Coding	41	GC17P040015	6.25
352	DNMT1	DNA Methyltransferase 1	Protein Coding	52	GC19M010133	6.24
353	CYP2C19	Cytochrome P450 Family 2 Subfamily C Member 19	Protein Coding	48	GC10P094762	6.22
354	SELL	Selectin L	Protein Coding	44	GC01M169690	6.22
355	GDF15	Growth Differentiation Factor 15	Protein Coding	43	GC19P022252	6.22
356	CASP3	Caspase 3	Protein Coding	52	GC04M184627	6.22
357	IGFBP1	Insulin Like Growth Factor Binding Protein 1	Protein Coding	45	GC07P046473	6.2
358	IL1A	Interleukin 1 Alpha	Protein Coding	45	GC02M112773	6.2
359	TTR	Transthyretin	Protein Coding	51	GC18P031557	6.19
360	MTR	5-Methyltetrahydrofolate-Homocysteine Methyltransferase	Protein Coding	47	GC01P236795	6.19
361	SLC10A2	Solute Carrier Family 10 Member 2	Protein Coding	41	GC13M103043	6.17
362	LGALS3	Galectin 3	Protein Coding	46	GC14P055124	6.15
363	CYP7B1	Cytochrome P450 Family 7 Subfamily B Member 1	Protein Coding	47	GC08M064587	6.13
364	RNF213	Ring Finger Protein 213	Protein Coding	40	GC17P080260	6.13
365	GCG	Glucagon	Protein Coding	42	GC02M162142	6.12
366	PTGIS	Prostaglandin I2 Synthase	Protein Coding	48	GC20M049503	6.11
367	ITGAV	Integrin Subunit Alpha V	Protein Coding	48	GC02P186589	6.11
368	GCLC	Glutamate-Cysteine Ligase Catalytic Subunit	Protein Coding	45	GC06M053497	6.11
369	ITGA2	Integrin Subunit Alpha 2	Protein Coding	47	GC05P052989	6.09
370	SIRT6	Sirtuin 6	Protein Coding	47	GC19M004174	6.09
371	FN1	Fibronectin 1	Protein Coding	51	GC02M215360	6.08
372	LIPF	Lipase F, Gastric Type	Protein Coding	43	GC10P088664	6.07
373	IL33	Interleukin 33	Protein Coding	41	GC09P006206	6.07
374	ELANE	Elastase, Neutrophil Expressed	Protein Coding	48	GC19P000854	6.06
375	EPO	Erythropoietin	Protein Coding	43	GC07P100720	6.06
376	ITGB1	Integrin Subunit Beta 1	Protein Coding	51	GC10M032900	6.06
377	MYOCD	Myocardin	Protein Coding	41	GC17P012665	6.05
378	C3	Complement C3	Protein Coding	49	GC19M006677	6.04
379	GP1BA	Glycoprotein Ib Platelet Subunit Alpha	Protein Coding	47	GC17P004932	6.02
380	SULT1A3	Sulfotransferase Family 1A Member 3	Protein Coding	39	GC16P030199	6.02
381	MMP7	Matrix Metallopeptidase 7	Protein Coding	50	GC11M102425	6.01
382	F8	Coagulation Factor VIII	Protein Coding	47	GC0XM154835	6
383	NPPA	Natriuretic Peptide A	Protein Coding	48	GC01M011846	6
384	FDFT1	Farnesyl-Diphosphate Farnesyltransferase 1	Protein Coding	46	GC08P011795	5.99
385	ROCK1	Rho Associated Coiled-Coil Containing Protein Kinase 1	Protein Coding	51	GC18M020946	5.98
386	PSMA6	Proteasome 20S Subunit Alpha 6	Protein Coding	47	GC14P035278	5.98
387	MIR140	MicroRNA 140	RNA Gene	22	GC16P069934	5.98
388	CSF2	Colony Stimulating Factor 2	Protein Coding	45	GC05P132073	5.97
389	CXCL16	C-X-C Motif Chemokine Ligand 16	Protein Coding	41	GC17M004733	5.97
390	DPP4	Dipeptidyl Peptidase 4	Protein Coding	51	GC02M161992	5.96
391	XDH	Xanthine Dehydrogenase	Protein Coding	47	GC02M031294	5.95
392	COX5A	Cytochrome C Oxidase Subunit 5A	Protein Coding	44	GC15M074919	5.95
393	LGALS2	Galectin 2	Protein Coding	42	GC22M037570	5.93
394	SCAP	SREBF Chaperone	Protein Coding	41	GC03M047413	5.92
395	TCF7L2	Transcription Factor 7 Like 2	Protein Coding	47	GC10P112950	5.91
396	PGF	Placental Growth Factor	Protein Coding	45	GC14M074941	5.91
397	CD34	CD34 Molecule	Protein Coding	45	GC01M207880	5.91
398	PPARGC1A	PPARG Coactivator 1 Alpha	Protein Coding	48	GC04M023755	5.89
399	LRP8	LDL Receptor Related Protein 8	Protein Coding	47	GC01M053243	5.88
400	PLN	Phospholamban	Protein Coding	45	GC06P118548	5.88
401	CCL11	C-C Motif Chemokine Ligand 11	Protein Coding	45	GC17P034285	5.87
402	VTN	Vitronectin	Protein Coding	45	GC17M029696	5.86
403	GFAP	Glial Fibrillary Acidic Protein	Protein Coding	49	GC17M044905	5.86
404	TGFBR3	Transforming Growth Factor Beta Receptor 3	Protein Coding	47	GC01M091680	5.85
405	ANTXR1	ANTXR Cell Adhesion Molecule 1	Protein Coding	47	GC02P068977	5.85
406	AGXT	Alanine--Glyoxylate And Serine--Pyruvate Aminotransferase	Protein Coding	46	GC02P240868	5.85
407	HGD	Homogentisate 1,2-Dioxygenase	Protein Coding	45	GC03M120628	5.85
408	ANGPTL6	Angiopoietin Like 6	Protein Coding	40	GC19M010092	5.85
409	CEL	Carboxyl Ester Lipase	Protein Coding	47	GC09P133061	5.84
410	BLM	BLM RecQ Like Helicase	Protein Coding	49	GC15P090717	5.81
411	SP1	Sp1 Transcription Factor	Protein Coding	45	GC12P053380	5.8
412	SELPLG	Selectin P Ligand	Protein Coding	44	GC12M108621	5.79
413	MIR19B1	MicroRNA 19b-1	RNA Gene	18	GC13P091428	5.78
414	AGTR2	Angiotensin II Receptor Type 2	Protein Coding	44	GC0XP116170	5.78
415	ITGB2	Integrin Subunit Beta 2	Protein Coding	52	GC21M044885	5.77
416	CCL3	C-C Motif Chemokine Ligand 3	Protein Coding	41	GC17M036088	5.76
417	PTEN	Phosphatase And Tensin Homolog	Protein Coding	54	GC10P087863	5.76
418	BLK	BLK Proto-Oncogene, Src Family Tyrosine Kinase	Protein Coding	52	GC08P011486	5.75
419	SOCS1	Suppressor Of Cytokine Signaling 1	Protein Coding	45	GC16M011255	5.74
420	EDNRB	Endothelin Receptor Type B	Protein Coding	50	GC13M077895	5.74
421	RPA1	Replication Protein A1	Protein Coding	47	GC17P001829	5.74
422	RECQL4	RecQ Like Helicase 4	Protein Coding	43	GC08M144512	5.74
423	JAK2	Janus Kinase 2	Protein Coding	55	GC09P004985	5.73
424	EGF	Epidermal Growth Factor	Protein Coding	52	GC04P109912	5.73
425	ABCB1	ATP Binding Cassette Subfamily B Member 1	Protein Coding	52	GC07M087504	5.73
426	KLF2	Kruppel Like Factor 2	Protein Coding	41	GC19P022206	5.72
427	MAPK7	Mitogen-Activated Protein Kinase 7	Protein Coding	50	GC17P019379	5.71
428	NLRP3	NLR Family Pyrin Domain Containing 3	Protein Coding	48	GC01P247415	5.69
429	PHACTR1	Phosphatase And Actin Regulator 1	Protein Coding	38	GC06P012717	5.69
430	CYP11B2	Cytochrome P450 Family 11 Subfamily B Member 2	Protein Coding	47	GC08M142910	5.67
431	PLCG1	Phospholipase C Gamma 1	Protein Coding	48	GC20P041136	5.67
432	SERPINA3	Serpin Family A Member 3	Protein Coding	45	GC14P094612	5.67
433	VLDLR	Very Low Density Lipoprotein Receptor	Protein Coding	49	GC09P002611	5.65
434	ADM	Adrenomedullin	Protein Coding	45	GC11P010304	5.64
435	ITGAL	Integrin Subunit Alpha L	Protein Coding	47	GC16P030472	5.63
436	CYCS	Cytochrome C, Somatic	Protein Coding	50	GC07M025118	5.63
437	ACTC1	Actin Alpha Cardiac Muscle 1	Protein Coding	43	GC15M034788	5.58
438	RAD51	RAD51 Recombinase	Protein Coding	52	GC15P040694	5.58
439	RAD54L	RAD54 Like	Protein Coding	50	GC01P046251	5.58
440	MLH1	MutL Homolog 1	Protein Coding	49	GC03P036993	5.58
441	POLB	DNA Polymerase Beta	Protein Coding	48	GC08P042338	5.58
442	FEN1	Flap Structure-Specific Endonuclease 1	Protein Coding	48	GC11P061811	5.58
443	EXO1	Exonuclease 1	Protein Coding	44	GC01P241847	5.58
444	RAD52	RAD52 Homolog, DNA Repair Protein	Protein Coding	43	GC12M000912	5.58
445	MRE11	MRE11 Homolog, Double Strand Break Repair Nuclease	Protein Coding	43	GC11M094416	5.58
446	TERF1	Telomeric Repeat Binding Factor 1	Protein Coding	43	GC08P073003	5.58
447	RECQL	RecQ Like Helicase	Protein Coding	42	GC12M021468	5.58
448	CIDEC	Cell Death Inducing DFFA Like Effector C	Protein Coding	42	GC03M009866	5.58
449	DHX9	DExH-Box Helicase 9	Protein Coding	41	GC01P182839	5.58
450	RECQL5	RecQ Like Helicase 5	Protein Coding	40	GC17M075626	5.58
451	WRNIP1	WRN Helicase Interacting Protein 1	Protein Coding	37	GC06P002766	5.58
452	PURG	Purine Rich Element Binding Protein G	Protein Coding	35	GC08M030995	5.58
453	MIR6886	MicroRNA 6886	RNA Gene	10	GC19P011114	5.58
454	VKORC1	Vitamin K Epoxide Reductase Complex Subunit 1	Protein Coding	48	GC16M031105	5.58
455	ANGPT1	Angiopoietin 1	Protein Coding	47	GC08M107246	5.58
456	MTRR	5-Methyltetrahydrofolate-Homocysteine Methyltransferase Reductase	Protein Coding	44	GC05P007851	5.58
457	B2M	Beta-2-Microglobulin	Protein Coding	50	GC15P044711	5.57
458	GUCY1A1	Guanylate Cyclase 1 Soluble Subunit Alpha 1	Protein Coding	37	GC04P155667	5.53
459	MB	Myoglobin	Protein Coding	45	GC22M035606	5.52
460	FABP3	Fatty Acid Binding Protein 3	Protein Coding	45	GC01M031365	5.52
461	EGFR	Epidermal Growth Factor Receptor	Protein Coding	56	GC07P055019	5.5
462	HIF1A	Hypoxia Inducible Factor 1 Subunit Alpha	Protein Coding	49	GC14P061695	5.5
463	C5	Complement C5	Protein Coding	48	GC09M120952	5.47
464	SLC2A4	Solute Carrier Family 2 Member 4	Protein Coding	47	GC17P007282	5.47
465	PPARD	Peroxisome Proliferator Activated Receptor Delta	Protein Coding	48	GC06P046031	5.47
466	MBL2	Mannose Binding Lectin 2	Protein Coding	48	GC10M052760	5.45
467	RBP4	Retinol Binding Protein 4	Protein Coding	45	GC10M093591	5.44
468	CD5L	CD5 Molecule Like	Protein Coding	39	GC01M157800	5.44
469	TPO	Thyroid Peroxidase	Protein Coding	49	GC02P001374	5.44
470	ERCC1	ERCC Excision Repair 1, Endonuclease Non-Catalytic Subunit	Protein Coding	47	GC19M045409	5.44
471	MIR221	MicroRNA 221	RNA Gene	21	GC0XM045746	5.42
472	PRL	Prolactin	Protein Coding	44	GC06M022230	5.42
473	ABCG2	ATP Binding Cassette Subfamily G Member 2 (Junior Blood Group)	Protein Coding	52	GC04M088090	5.39
474	P2RY12	Purinergic Receptor P2Y12	Protein Coding	49	GC03M151336	5.38
475	HSP90AA1	Heat Shock Protein 90 Alpha Family Class A Member 1	Protein Coding	50	GC14M102080	5.37
476	SPEG	Striated Muscle Enriched Protein Kinase	Protein Coding	42	GC02P219434	5.37
477	RECK	Reversion Inducing Cysteine Rich Protein With Kazal Motifs	Protein Coding	42	GC09P036036	5.37
478	HTRA1	HtrA Serine Peptidase 1	Protein Coding	44	GC10P122461	5.37
479	CXCL1	C-X-C Motif Chemokine Ligand 1	Protein Coding	44	GC04P073869	5.36
480	SLC2A9	Solute Carrier Family 2 Member 9	Protein Coding	47	GC04M009772	5.35
481	CXCL10	C-X-C Motif Chemokine Ligand 10	Protein Coding	45	GC04M076021	5.35
482	PRTN3	Proteinase 3	Protein Coding	46	GC19P000840	5.34
483	SPARC	Secreted Protein Acidic And Cysteine Rich	Protein Coding	52	GC05M151639	5.33
484	AHSP	Alpha Hemoglobin Stabilizing Protein	Protein Coding	37	GC16P031527	5.32
485	GRN	Granulin Precursor	Protein Coding	48	GC17P044345	5.31
486	NOX4	NADPH Oxidase 4	Protein Coding	44	GC11M089324	5.31
487	CHIT1	Chitinase 1	Protein Coding	45	GC01M203181	5.3
488	C4B	Complement C4B (Chido Blood Group)	Protein Coding	42	GC06P032014	5.3
489	F2R	Coagulation Factor II Thrombin Receptor	Protein Coding	48	GC05P076716	5.29
490	PTPRC	Protein Tyrosine Phosphatase Receptor Type C	Protein Coding	52	GC01P198607	5.27
491	THBS1	Thrombospondin 1	Protein Coding	45	GC15P039581	5.26
492	GNB3	G Protein Subunit Beta 3	Protein Coding	48	GC12P006839	5.26
493	IGF2R	Insulin Like Growth Factor 2 Receptor	Protein Coding	47	GC06P159969	5.25
494	M6PR	Mannose-6-Phosphate Receptor, Cation Dependent	Protein Coding	44	GC12M008951	5.25
495	CH25H	Cholesterol 25-Hydroxylase	Protein Coding	39	GC10M089205	5.25
496	LIN9	Lin-9 DREAM MuvB Core Complex Component	Protein Coding	38	GC01M226231	5.25
497	ARSH	Arylsulfatase Family Member H	Protein Coding	35	GC0XP003006	5.25
498	NR3C2	Nuclear Receptor Subfamily 3 Group C Member 2	Protein Coding	49	GC04M148078	5.25
499	LIPE	Lipase E, Hormone Sensitive Type	Protein Coding	49	GC19M042401	5.25
500	BDNF	Brain Derived Neurotrophic Factor	Protein Coding	48	GC11M027654	5.23
501	MAPK3	Mitogen-Activated Protein Kinase 3	Protein Coding	51	GC16M030117	5.22
502	TNC	Tenascin C	Protein Coding	49	GC09M115019	5.22
503	LTA4H	Leukotriene A4 Hydrolase	Protein Coding	47	GC12M096000	5.22
504	OGN	Osteoglycin	Protein Coding	41	GC09M092383	5.21
505	PTH	Parathyroid Hormone	Protein Coding	48	GC11M013492	5.2
506	IL2RA	Interleukin 2 Receptor Subunit Alpha	Protein Coding	52	GC10M006010	5.2
507	TTN	Titin	Protein Coding	48	GC02M178525	5.18
508	MTOR	Mechanistic Target Of Rapamycin Kinase	Protein Coding	54	GC01M011106	5.18
509	PRKAA1	Protein Kinase AMP-Activated Catalytic Subunit Alpha 1	Protein Coding	49	GC05M040759	5.18
510	CYBB	Cytochrome B-245 Beta Chain	Protein Coding	48	GC0XP037780	5.15
511	SMAD2	SMAD Family Member 2	Protein Coding	48	GC18M047809	5.15
512	ADD1	Adducin 1	Protein Coding	45	GC04P002856	5.14
513	SOCS3	Suppressor Of Cytokine Signaling 3	Protein Coding	45	GC17M078356	5.14
514	IRF5	Interferon Regulatory Factor 5	Protein Coding	50	GC07P128937	5.13
515	CR2	Complement C3d Receptor 2	Protein Coding	46	GC01P207454	5.13
516	SMARCAL1	SWI/SNF Related, Matrix Associated, Actin Dependent Regulator Of Chromatin, Subfamily A Like 1	Protein Coding	44	GC02P216412	5.13
517	CALR	Calreticulin	Protein Coding	52	GC19P012938	5.13
518	RHOD	Ras Homolog Family Member D	Protein Coding	40	GC11P067057	5.13
519	MIR30C1	MicroRNA 30c-1	RNA Gene	22	GC01P040757	5.1
520	ARF1	ADP Ribosylation Factor 1	Protein Coding	48	GC01P228082	5.1
521	PITPNA	Phosphatidylinositol Transfer Protein Alpha	Protein Coding	41	GC17M001525	5.1
522	CES3	Carboxylesterase 3	Protein Coding	40	GC16P066963	5.1
523	PNPLA5	Patatin Like Phospholipase Domain Containing 5	Protein Coding	35	GC22M043879	5.1
524	LIPK	Lipase Family Member K	Protein Coding	35	GC10P088724	5.1
525	CES4A	Carboxylesterase 4A	Protein Coding	33	GC16P066988	5.1
526	CES5A	Carboxylesterase 5A	Protein Coding	33	GC16M055881	5.1
527	LIPJ	Lipase Family Member J	Protein Coding	33	GC10P088583	5.1
528	VSTM4	V-Set And Transmembrane Domain Containing 4	Protein Coding	32	GC10M049014	5.1
529	LIPM	Lipase Family Member M	Protein Coding	32	GC10P088804	5.1
530	CD59	CD59 Molecule (CD59 Blood Group)	Protein Coding	48	GC11M033704	5.09
531	F9	Coagulation Factor IX	Protein Coding	47	GC0XP139530	5.08
532	MIR30A	MicroRNA 30a	RNA Gene	20	GC06M071403	5.08
533	CCL13	C-C Motif Chemokine Ligand 13	Protein Coding	40	GC17P034356	5.08
534	TNFSF12	TNF Superfamily Member 12	Protein Coding	42	GC17P007935	5.07
535	ANKRD1	Ankyrin Repeat Domain 1	Protein Coding	43	GC10M090912	5.07
536	MIR182	MicroRNA 182	RNA Gene	20	GC07M129770	5.07
537	TSPO	Translocator Protein	Protein Coding	44	GC22P043151	5.05
538	APH1B	Aph-1 Homolog B, Gamma-Secretase Subunit	Protein Coding	44	GC15P071873	5.05
539	PRKAA2	Protein Kinase AMP-Activated Catalytic Subunit Alpha 2	Protein Coding	51	GC01P056645	5.03
540	CD86	CD86 Molecule	Protein Coding	45	GC03P122055	5.03
541	NR4A1	Nuclear Receptor Subfamily 4 Group A Member 1	Protein Coding	48	GC12P052022	5.02
542	MAPK10	Mitogen-Activated Protein Kinase 10	Protein Coding	52	GC04M085990	5.01
543	FGF2	Fibroblast Growth Factor 2	Protein Coding	49	GC04P122826	5.01
544	AOC3	Amine Oxidase Copper Containing 3	Protein Coding	45	GC17P042851	4.99
545	GSR	Glutathione-Disulfide Reductase	Protein Coding	50	GC08M030678	4.98
546	GP6	Glycoprotein VI Platelet	Protein Coding	45	GC19M055013	4.97
547	PLIN1	Perilipin 1	Protein Coding	46	GC15M089664	4.97
548	SMARCA4	SWI/SNF Related, Matrix Associated, Actin Dependent Regulator Of Chromatin, Subfamily A, Member 4	Protein Coding	52	GC19P010932	4.96
549	MASP2	Mannan Binding Lectin Serine Peptidase 2	Protein Coding	45	GC01M011026	4.95
550	AR	Androgen Receptor	Protein Coding	54	GC0XP067544	4.93
551	CD4	CD4 Molecule	Protein Coding	51	GC12P006786	4.92
552	CHRNA7	Cholinergic Receptor Nicotinic Alpha 7 Subunit	Protein Coding	47	GC15P031923	4.92
553	DES	Desmin	Protein Coding	49	GC02P219418	4.91
554	KIAA0319L	KIAA0319 Like	Protein Coding	39	GC01M035433	4.91
555	GSTP1	Glutathione S-Transferase Pi 1	Protein Coding	51	GC11P067583	4.91
556	GAS6	Growth Arrest Specific 6	Protein Coding	45	GC13M113820	4.9
557	CYP3A4	Cytochrome P450 Family 3 Subfamily A Member 4	Protein Coding	51	GC07M099759	4.88
558	FCGR3B	Fc Fragment Of IgG Receptor IIIb	Protein Coding	44	GC01M161623	4.88
559	BHMT	Betaine--Homocysteine S-Methyltransferase	Protein Coding	43	GC05P079111	4.86
560	ADPRH	ADP-Ribosylarginine Hydrolase	Protein Coding	38	GC03P119579	4.86
561	APOC1	Apolipoprotein C1	Protein Coding	41	GC19P044914	4.85
562	ADAM17	ADAM Metallopeptidase Domain 17	Protein Coding	52	GC02M009488	4.85
563	LAMP2	Lysosomal Associated Membrane Protein 2	Protein Coding	46	GC0XM120426	4.83
564	MIR196A2	MicroRNA 196a-2	RNA Gene	22	GC12P054167	4.83
565	CHUK	Component Of Inhibitor Of Nuclear Factor Kappa B Kinase Complex	Protein Coding	52	GC10M100188	4.81
566	GC	GC Vitamin D Binding Protein	Protein Coding	44	GC04M071741	4.81
567	FOXP3	Forkhead Box P3	Protein Coding	48	GC0XM049250	4.81
568	TNFSF11	TNF Superfamily Member 11	Protein Coding	49	GC13P042562	4.8
569	ACTG1	Actin Gamma 1	Protein Coding	51	GC17M081509	4.8
570	LEPQTL1	Leptin, Serum Levels Of	Genetic Locus	4	GC02U903086	4.79
571	ABCC1	ATP Binding Cassette Subfamily C Member 1	Protein Coding	48	GC16P015949	4.79
572	ACTN2	Actinin Alpha 2	Protein Coding	48	GC01P236686	4.78
573	CSRP3	Cysteine And Glycine Rich Protein 3	Protein Coding	42	GC11M019160	4.78
574	NEXN	Nexilin F-Actin Binding Protein	Protein Coding	40	GC01P077899	4.78
575	RELA	RELA Proto-Oncogene, NF-KB Subunit	Protein Coding	51	GC11M065653	4.78
576	POSTN	Periostin	Protein Coding	45	GC13M037562	4.77
577	S100A9	S100 Calcium Binding Protein A9	Protein Coding	44	GC01P153357	4.77
578	GLA	Galactosidase Alpha	Protein Coding	50	GC0XM101397	4.76
579	CD55	CD55 Molecule (Cromer Blood Group)	Protein Coding	48	GC01P207321	4.75
580	BCAR1	BCAR1 Scaffold Protein, Cas Family Member	Protein Coding	45	GC16M075228	4.75
581	FOXO3	Forkhead Box O3	Protein Coding	45	GC06P108559	4.74
582	BMP4	Bone Morphogenetic Protein 4	Protein Coding	50	GC14M053949	4.74
583	ACTB	Actin Beta	Protein Coding	50	GC07M005527	4.73
584	IL15	Interleukin 15	Protein Coding	42	GC04P141636	4.72
585	CALCA	Calcitonin Related Polypeptide Alpha	Protein Coding	44	GC11M014945	4.72
586	APLNR	Apelin Receptor	Protein Coding	44	GC11M057233	4.72
587	ABCC2	ATP Binding Cassette Subfamily C Member 2	Protein Coding	49	GC10P099782	4.72
588	LBR	Lamin B Receptor	Protein Coding	49	GC01M225401	4.72
589	ACHE	Acetylcholinesterase (Cartwright Blood Group)	Protein Coding	47	GC07M100889	4.72
590	SYNE2	Spectrin Repeat Containing Nuclear Envelope Protein 2	Protein Coding	40	GC14P063852	4.72
591	LIPI	Lipase I	Protein Coding	38	GC21M014108	4.72
592	PAOD1	Peripheral Arterial Occlusive Disease 1	Genetic Locus	3	GC01U990476	4.72
593	CYP1A1	Cytochrome P450 Family 1 Subfamily A Member 1	Protein Coding	48	GC15M074719	4.72
594	CCN3	Cellular Communication Network Factor 3	Protein Coding	34	GC08P119416	4.71
595	ABCA4	ATP Binding Cassette Subfamily A Member 4	Protein Coding	45	GC01M093992	4.71
596	FBLN5	Fibulin 5	Protein Coding	45	GC14M091869	4.71
597	SST	Somatostatin	Protein Coding	43	GC03M187668	4.71
598	MIR214	MicroRNA 214	RNA Gene	20	GC01M172229	4.71
599	CNR1	Cannabinoid Receptor 1	Protein Coding	48	GC06M088139	4.67
600	CES1	Carboxylesterase 1	Protein Coding	48	GC16M055836	4.67
601	NGF	Nerve Growth Factor	Protein Coding	52	GC01M115285	4.67
602	FASLG	Fas Ligand	Protein Coding	49	GC01P172628	4.67
603	KCNQ1	Potassium Voltage-Gated Channel Subfamily Q Member 1	Protein Coding	51	GC11P002444	4.67
604	GAS5	Growth Arrest Specific 5	RNA Gene	24	GC01M174119	4.66
605	MIR590	MicroRNA 590	RNA Gene	19	GC07P074191	4.64
606	IL6ST	Interleukin 6 Signal Transducer	Protein Coding	47	GC05M055935	4.64
607	CHI3L1	Chitinase 3 Like 1	Protein Coding	45	GC01M203148	4.63
608	ALDH2	Aldehyde Dehydrogenase 2 Family Member	Protein Coding	52	GC12P111766	4.62
609	LRP6	LDL Receptor Related Protein 6	Protein Coding	49	GC12M013402	4.61
610	LPXN	Leupaxin	Protein Coding	41	GC11M059798	4.6
611	CCR7	C-C Motif Chemokine Receptor 7	Protein Coding	46	GC17M040556	4.6
612	MAOB	Monoamine Oxidase B	Protein Coding	44	GC0XM043766	4.6
613	MMP17	Matrix Metallopeptidase 17	Protein Coding	43	GC12P131828	4.6
614	C9orf72	C9orf72-SMCR8 Complex Subunit	Protein Coding	42	GC09M027539	4.6
615	LMF1	Lipase Maturation Factor 1	Protein Coding	40	GC16M000853	4.6
616	TNFRSF1B	TNF Receptor Superfamily Member 1B	Protein Coding	49	GC01P012167	4.59
617	TLR9	Toll Like Receptor 9	Protein Coding	46	GC03M052222	4.59
618	PROCR	Protein C Receptor	Protein Coding	44	GC20P035171	4.58
619	MMP13	Matrix Metallopeptidase 13	Protein Coding	51	GC11M102942	4.58
620	SORT1	Sortilin 1	Protein Coding	44	GC01M109310	4.58
621	SDC1	Syndecan 1	Protein Coding	45	GC02M020200	4.57
622	MIR29A	MicroRNA 29a	RNA Gene	22	GC07M130876	4.56
623	RPS27A	Ribosomal Protein S27a	Protein Coding	44	GC02P055231	4.56
624	S100A8	S100 Calcium Binding Protein A8	Protein Coding	44	GC01M153391	4.56
625	DSP	Desmoplakin	Protein Coding	51	GC06P007541	4.56
626	TPM1	Tropomyosin 1	Protein Coding	50	GC15P072846	4.56
627	FCGR2B	Fc Fragment Of IgG Receptor IIb	Protein Coding	49	GC01P161663	4.56
628	TP63	Tumor Protein P63	Protein Coding	49	GC03P189566	4.56
629	MYBPC3	Myosin Binding Protein C3	Protein Coding	48	GC11M059693	4.56
630	DMD	Dystrophin	Protein Coding	48	GC0XM031047	4.56
631	SGCD	Sarcoglycan Delta	Protein Coding	47	GC05P155870	4.56
632	DSG2	Desmoglein 2	Protein Coding	47	GC18P031498	4.56
633	EMD	Emerin	Protein Coding	47	GC0XP154379	4.56
634	MECP2	Methyl-CpG Binding Protein 2	Protein Coding	47	GC0XM154021	4.56
635	NKX2-5	NK2 Homeobox 5	Protein Coding	46	GC05M173232	4.56
636	VIP	Vasoactive Intestinal Peptide	Protein Coding	46	GC06P152750	4.56
637	UBE2L3	Ubiquitin Conjugating Enzyme E2 L3	Protein Coding	46	GC22P021549	4.56
638	TAZ	Tafazzin	Protein Coding	45	GC0XP154411	4.56
639	TMPO	Thymopoietin	Protein Coding	45	GC12P098515	4.56
640	FLNC	Filamin C	Protein Coding	45	GC07P128830	4.56
641	EIF2B2	Eukaryotic Translation Initiation Factor 2B Subunit Beta	Protein Coding	45	GC14P075002	4.56
642	BAG3	BAG Cochaperone 3	Protein Coding	45	GC10P119651	4.56
643	SYP	Synaptophysin	Protein Coding	45	GC0XM049187	4.56
644	ITIH4	Inter-Alpha-Trypsin Inhibitor Heavy Chain 4	Protein Coding	44	GC03M052812	4.56
645	ICMT	Isoprenylcysteine Carboxyl Methyltransferase	Protein Coding	43	GC01M006222	4.56
646	TCAP	Titin-Cap	Protein Coding	43	GC17P039664	4.56
647	SYNE1	Spectrin Repeat Containing Nuclear Envelope Protein 1	Protein Coding	42	GC06M152121	4.56
648	CCT7	Chaperonin Containing TCP1 Subunit 7	Protein Coding	42	GC02P073233	4.56
649	LDB3	LIM Domain Binding 3	Protein Coding	42	GC10P086666	4.56
650	PREPL	Prolyl Endopeptidase Like	Protein Coding	41	GC02M044281	4.56
651	JAZF1	JAZF Zinc Finger 1	Protein Coding	40	GC07M027830	4.56
652	MCM9	Minichromosome Maintenance 9 Homologous Recombination Repair Factor	Protein Coding	40	GC06M118813	4.56
653	FKTN	Fukutin	Protein Coding	40	GC09P105558	4.56
654	PXK	PX Domain Containing Serine/Threonine Kinase Like	Protein Coding	39	GC03P058333	4.56
655	SUN2	Sad1 And UNC84 Domain Containing 2	Protein Coding	38	GC22M044549	4.56
656	RBM20	RNA Binding Motif Protein 20	Protein Coding	37	GC10P110644	4.56
657	BANK1	B Cell Scaffold Protein With Ankyrin Repeats 1	Protein Coding	37	GC04P101411	4.56
658	SGO2	Shugoshin 2	Protein Coding	31	GC02P200511	4.56
659	SLEB3	Systemic Lupus Erythematosus Susceptibility 3	Genetic Locus	4	GC04U990113	4.56
660	CHDS1	Coronary Heart Disease, Susceptibility To, 1	Genetic Locus	3	GC16U900003	4.56
661	CHDS2	Coronary Heart Disease, Susceptibility To, 2	Genetic Locus	3	GC02U900242	4.56
662	CHDS3	Coronary Heart Disease, Susceptibility To, 3	Genetic Locus	3	GC0XU900293	4.56
663	CHDS4	Coronary Heart Disease, Susceptibility To, 4	Genetic Locus	3	GC14U900321	4.56
664	SLEB4	Systemic Lupus Erythematosus, Susceptibility To, 4	Genetic Locus	3	GC12U900444	4.56
665	SLEB15	Systemic Lupus Erthematosus, Susceptibility To, 15	Genetic Locus	2	GC0XU901369	4.56
666	CHDS8	Coronary Heart Disease, Susceptibility To, 8	Genetic Locus	2	GC09U901222	4.56
667	CHDS9	Coronary Heart Disease, Suscpetibility To, 9	Genetic Locus	2	GC08U901174	4.56
668	MCI2	Myocardial Infarction, Susceptiblity To, 2	Genetic Locus	2	GC13U900611	4.56
669	SLEB5	Systemic Lupus Erythematosus, Susceptibility To, 5	Genetic Locus	2	GC13U900574	4.56
670	SLEB7	Systemic Lupus Erythematosus, Susceptibility To, 7	Genetic Locus	2	GC20U900443	4.56
671	SLEB8	Systemic Lupus Erythematosus, Susceptibility To, 8	Genetic Locus	2	GC20U900434	4.56
672	SLEB12	Systemic Lupus Erythematosus, Susceptibility To, 12	Genetic Locus	2	GC08U901082	4.56
673	SLEB13	Systemic Lupus Erythematosus, Susceptibility To, 13	Genetic Locus	2	GC06U901477	4.56
674	SLEB14	Systemic Lupus Erythematosus, Susceptiblity To, 14	Genetic Locus	2	GC01U902528	4.56
675	CFTR	CF Transmembrane Conductance Regulator	Protein Coding	52	GC07P117465	4.55
676	MSTN	Myostatin	Protein Coding	47	GC02M190055	4.55
677	MMRN1	Multimerin 1	Protein Coding	40	GC04P089879	4.55
678	PLA2G2A	Phospholipase A2 Group IIA	Protein Coding	47	GC01M019975	4.55
679	BCL2	BCL2 Apoptosis Regulator	Protein Coding	53	GC18M063123	4.54
680	PALLD	Palladin, Cytoskeletal Associated Protein	Protein Coding	43	GC04P168497	4.54
681	CCL4	C-C Motif Chemokine Ligand 4	Protein Coding	42	GC17P036103	4.52
682	GAPDH	Glyceraldehyde-3-Phosphate Dehydrogenase	Protein Coding	50	GC12P006630	4.52
683	CLEC4A	C-Type Lectin Domain Family 4 Member A	Protein Coding	38	GC12P008123	4.52
684	CDH13	Cadherin 13	Protein Coding	43	GC16P082626	4.51
685	CD44	CD44 Molecule (Indian Blood Group)	Protein Coding	49	GC11P035139	4.51
686	BMP6	Bone Morphogenetic Protein 6	Protein Coding	45	GC06P007726	4.5
687	C1S	Complement C1s	Protein Coding	47	GC12P007884	4.48
688	PIK3C2A	Phosphatidylinositol-4-Phosphate 3-Kinase Catalytic Subunit Type 2 Alpha	Protein Coding	47	GC11M017165	4.48
689	CASP1	Caspase 1	Protein Coding	51	GC11M105025	4.47
690	POMC	Proopiomelanocortin	Protein Coding	50	GC02M025160	4.45
691	TOR2A	Torsin Family 2 Member A	Protein Coding	37	GC09M127732	4.45
692	IL13	Interleukin 13	Protein Coding	46	GC05P132656	4.44
693	SRF	Serum Response Factor	Protein Coding	43	GC06P043171	4.44
694	BCL2L1	BCL2 Like 1	Protein Coding	49	GC20M031664	4.42
695	JAK1	Janus Kinase 1	Protein Coding	52	GC01M064833	4.42
696	CAV2	Caveolin 2	Protein Coding	44	GC07P116287	4.39
697	TNFRSF4	TNF Receptor Superfamily Member 4	Protein Coding	45	GC01M001211	4.39
698	CAMP	Cathelicidin Antimicrobial Peptide	Protein Coding	43	GC03P048250	4.39
699	CXCR3	C-X-C Motif Chemokine Receptor 3	Protein Coding	45	GC0XM071615	4.38
700	TTPA	Alpha Tocopherol Transfer Protein	Protein Coding	42	GC08M063048	4.37
701	CCR1	C-C Motif Chemokine Receptor 1	Protein Coding	47	GC03M046218	4.37
702	PIK3CB	Phosphatidylinositol-4,5-Bisphosphate 3-Kinase Catalytic Subunit Beta	Protein Coding	48	GC03M138652	4.36
703	MIR222	MicroRNA 222	RNA Gene	21	GC0XM045747	4.35
704	CREB1	CAMP Responsive Element Binding Protein 1	Protein Coding	50	GC02P207529	4.33
705	ALOX15	Arachidonate 15-Lipoxygenase	Protein Coding	45	GC17M004630	4.32
706	CXCL9	C-X-C Motif Chemokine Ligand 9	Protein Coding	40	GC04M076001	4.29
707	MAOA	Monoamine Oxidase A	Protein Coding	51	GC0XP043654	4.29
708	GSK3B	Glycogen Synthase Kinase 3 Beta	Protein Coding	51	GC03M119821	4.28
709	MYD88	MYD88 Innate Immune Signal Transduction Adaptor	Protein Coding	51	GC03P038179	4.27
710	MME	Membrane Metalloendopeptidase	Protein Coding	52	GC03P155024	4.26
711	PPIA	Peptidylprolyl Isomerase A	Protein Coding	48	GC07P044808	4.24
712	IL5	Interleukin 5	Protein Coding	46	GC05M132541	4.24
713	FCGR3A	Fc Fragment Of IgG Receptor IIIa	Protein Coding	46	GC01M161541	4.23
714	GJA1	Gap Junction Protein Alpha 1	Protein Coding	52	GC06P121436	4.23
715	CXCL13	C-X-C Motif Chemokine Ligand 13	Protein Coding	43	GC04P077511	4.22
716	MERTK	MER Proto-Oncogene, Tyrosine Kinase	Protein Coding	51	GC02P111898	4.22
717	IKBKB	Inhibitor Of Nuclear Factor Kappa B Kinase Subunit Beta	Protein Coding	54	GC08P042271	4.21
718	PPP1R3A	Protein Phosphatase 1 Regulatory Subunit 3A	Protein Coding	43	GC07M113876	4.2
719	TLR7	Toll Like Receptor 7	Protein Coding	48	GC0XP012867	4.19
720	THBS2	Thrombospondin 2	Protein Coding	47	GC06M169215	4.19
721	RTN4	Reticulon 4	Protein Coding	46	GC02M054934	4.19
722	CCL19	C-C Motif Chemokine Ligand 19	Protein Coding	43	GC09M034692	4.19
723	MYLIP	Myosin Regulatory Light Chain Interacting Protein	Protein Coding	40	GC06P016129	4.19
724	MALAT1	Metastasis Associated Lung Adenocarcinoma Transcript 1	RNA Gene	25	GC11P065621	4.19
725	LBP	Lipopolysaccharide Binding Protein	Protein Coding	45	GC20P038346	4.18
726	DUSP1	Dual Specificity Phosphatase 1	Protein Coding	48	GC05M172768	4.18
727	CCL21	C-C Motif Chemokine Ligand 21	Protein Coding	44	GC09M034709	4.18
728	CYP27B1	Cytochrome P450 Family 27 Subfamily B Member 1	Protein Coding	48	GC12M057757	4.17
729	LMNB1	Lamin B1	Protein Coding	48	GC05P126776	4.17
730	MIR150	MicroRNA 150	RNA Gene	22	GC19M049500	4.17
731	TF	Transferrin	Protein Coding	51	GC03P133666	4.16
732	NCF1	Neutrophil Cytosolic Factor 1	Protein Coding	49	GC07P074773	4.16
733	CACNA2D1	Calcium Voltage-Gated Channel Auxiliary Subunit Alpha2delta 1	Protein Coding	47	GC07M081946	4.15
734	CD28	CD28 Molecule	Protein Coding	48	GC02P203706	4.15
735	CTH	Cystathionine Gamma-Lyase	Protein Coding	51	GC01P070411	4.14
736	CHGA	Chromogranin A	Protein Coding	44	GC14P092923	4.14
737	PIK3CA	Phosphatidylinositol-4,5-Bisphosphate 3-Kinase Catalytic Subunit Alpha	Protein Coding	54	GC03P179148	4.14
738	KCNJ11	Potassium Inwardly Rectifying Channel Subfamily J Member 11	Protein Coding	49	GC11M017364	4.11
739	SIRT2	Sirtuin 2	Protein Coding	50	GC19M038878	4.11
740	XPA	XPA, DNA Damage Recognition And Repair Factor	Protein Coding	47	GC09M097635	4.11
741	FGF4	Fibroblast Growth Factor 4	Protein Coding	45	GC11M069762	4.11
742	CRYAA	Crystallin Alpha A	Protein Coding	45	GC21P043169	4.11
743	CRAT	Carnitine O-Acetyltransferase	Protein Coding	45	GC09M129094	4.11
744	CYP46A1	Cytochrome P450 Family 46 Subfamily A Member 1	Protein Coding	42	GC14P099684	4.11
745	TNFRSF10C	TNF Receptor Superfamily Member 10c	Protein Coding	41	GC08P023102	4.11
746	SYNE3	Spectrin Repeat Containing Nuclear Envelope Family Member 3	Protein Coding	36	GC14M095408	4.11
747	FGG	Fibrinogen Gamma Chain	Protein Coding	50	GC04M154604	4.1
748	NCEH1	Neutral Cholesterol Ester Hydrolase 1	Protein Coding	40	GC03M172630	4.08
749	NPC1L1	NPC1 Like Intracellular Cholesterol Transporter 1	Protein Coding	45	GC07M044512	4.07
750	SDC4	Syndecan 4	Protein Coding	45	GC20M045325	4.07
751	CHST1	Carbohydrate Sulfotransferase 1	Protein Coding	38	GC11M045647	4.07
752	FGF23	Fibroblast Growth Factor 23	Protein Coding	47	GC12M004368	4.07
753	CIITA	Class II Major Histocompatibility Complex Transactivator	Protein Coding	46	GC16P010879	4.06
754	THBS4	Thrombospondin 4	Protein Coding	44	GC05P079991	4.05
755	KL	Klotho	Protein Coding	45	GC13P033016	4.05
756	CCN2	Cellular Communication Network Factor 2	Protein Coding	40	GC06M131948	4.04
757	CACNA1C	Calcium Voltage-Gated Channel Subunit Alpha1 C	Protein Coding	50	GC12P001970	4.03
758	C5AR1	Complement C5a Receptor 1	Protein Coding	45	GC19P047290	4.03
759	INHBA	Inhibin Subunit Beta A	Protein Coding	45	GC07M041668	4.02
760	AHCY	Adenosylhomocysteinase	Protein Coding	51	GC20M034257	4.02
761	MIR142	MicroRNA 142	RNA Gene	20	GC17M058331	4
762	CMA1	Chymase 1	Protein Coding	45	GC14M024506	4
763	HLA-DQB1	Major Histocompatibility Complex, Class II, DQ Beta 1	Protein Coding	45	GC06M032660	3.99
764	LTBP1	Latent Transforming Growth Factor Beta Binding Protein 1	Protein Coding	44	GC02P032946	3.97
765	TLR3	Toll Like Receptor 3	Protein Coding	54	GC04P186059	3.96
766	SMTN	Smoothelin	Protein Coding	40	GC22P031066	3.96
767	IL1R2	Interleukin 1 Receptor Type 2	Protein Coding	47	GC02P101991	3.96
768	SCN9A	Sodium Voltage-Gated Channel Alpha Subunit 9	Protein Coding	48	GC02M166195	3.95
769	EEF1A2	Eukaryotic Translation Elongation Factor 1 Alpha 2	Protein Coding	47	GC20M063488	3.95
770	ACAN	Aggrecan	Protein Coding	47	GC15P088814	3.95
771	LAMA1	Laminin Subunit Alpha 1	Protein Coding	47	GC18M006941	3.95
772	RAN	RAN, Member RAS Oncogene Family	Protein Coding	46	GC12P130871	3.95
773	RFC1	Replication Factor C Subunit 1	Protein Coding	46	GC04M039291	3.95
774	PRPS1	Phosphoribosyl Pyrophosphate Synthetase 1	Protein Coding	45	GC0XP107628	3.95
775	ANK3	Ankyrin 3	Protein Coding	45	GC10M060026	3.95
776	TP53BP1	Tumor Protein P53 Binding Protein 1	Protein Coding	45	GC15M043403	3.95
777	LMNB2	Lamin B2	Protein Coding	45	GC19M002435	3.95
778	SUV39H1	Suppressor Of Variegation 3-9 Homolog 1	Protein Coding	44	GC0XP048697	3.95
779	SPG7	SPG7 Matrix AAA Peptidase Subunit, Paraplegin	Protein Coding	44	GC16P089492	3.95
780	REG1A	Regenerating Family Member 1 Alpha	Protein Coding	43	GC02P079120	3.95
781	TWIST2	Twist Family BHLH Transcription Factor 2	Protein Coding	43	GC02P238848	3.95
782	UBA7	Ubiquitin Like Modifier Activating Enzyme 7	Protein Coding	43	GC03M049805	3.95
783	KLK15	Kallikrein Related Peptidase 15	Protein Coding	42	GC19M050825	3.95
784	LEMD3	LEM Domain Containing 3	Protein Coding	42	GC12P065169	3.95
785	BCAR3	BCAR3 Adaptor Protein, NSP Family Member	Protein Coding	41	GC01M093561	3.95
786	GAST	Gastrin	Protein Coding	41	GC17P041712	3.95
787	FDX1	Ferredoxin 1	Protein Coding	41	GC11P110429	3.95
788	ERCC8	ERCC Excision Repair 8, CSA Ubiquitin Ligase Complex Subunit	Protein Coding	41	GC05M060873	3.95
789	TMEM59	Transmembrane Protein 59	Protein Coding	40	GC01M054031	3.95
790	DYNC2LI1	Dynein Cytoplasmic 2 Light Intermediate Chain 1	Protein Coding	40	GC02P043737	3.95
791	NAT10	N-Acetyltransferase 10	Protein Coding	40	GC11P034105	3.95
792	GATA5	GATA Binding Protein 5	Protein Coding	40	GC20M062464	3.95
793	SUN1	Sad1 And UNC84 Domain Containing 1	Protein Coding	39	GC07P000857	3.95
794	RCE1	Ras Converting CAAX Endopeptidase 1	Protein Coding	39	GC11P066842	3.95
795	TRERF1	Transcriptional Regulating Factor 1	Protein Coding	39	GC06M042224	3.95
796	HDX	Highly Divergent Homeobox	Protein Coding	33	GC0XM084317	3.95
797	SYNE4	Spectrin Repeat Containing Nuclear Envelope Family Member 4	Protein Coding	33	GC19M036003	3.95
798	FAM186A	Family With Sequence Similarity 186 Member A	Protein Coding	31	GC12M050326	3.95
799	LEXM	Lymphocyte Expansion Molecule	Protein Coding	25	GC01P054807	3.95
800	MIR9-1	MicroRNA 9-1	RNA Gene	21	GC01M156420	3.95
801	BCAR4	Breast Cancer Anti-Estrogen Resistance 4	RNA Gene	18	GC16M011819	3.95
802	H3-2	H3.2 Histone (Putative)	Protein Coding	17	GC01M143894	3.95
803	LINC00400	Long Intergenic Non-Protein Coding RNA 400	RNA Gene	13	GC13P043113	3.95
804	ECE1	Endothelin Converting Enzyme 1	Protein Coding	48	GC01M021217	3.95
805	COL4A1	Collagen Type IV Alpha 1 Chain	Protein Coding	49	GC13M110148	3.95
806	F11	Coagulation Factor XI	Protein Coding	45	GC04P186265	3.95
807	SGCB	Sarcoglycan Beta	Protein Coding	41	GC04M052019	3.95
808	IL23A	Interleukin 23 Subunit Alpha	Protein Coding	41	GC12P056335	3.93
809	MIR143	MicroRNA 143	RNA Gene	23	GC05P149410	3.93
810	PRNP	Prion Protein	Protein Coding	48	GC20P004686	3.93
811	KITLG	KIT Ligand	Protein Coding	45	GC12M088492	3.93
812	GSTO1	Glutathione S-Transferase Omega 1	Protein Coding	44	GC10P104235	3.93
813	CYP2J2	Cytochrome P450 Family 2 Subfamily J Member 2	Protein Coding	45	GC01M059893	3.92
814	PRKAG2	Protein Kinase AMP-Activated Non-Catalytic Subunit Gamma 2	Protein Coding	51	GC07M151556	3.91
815	CD80	CD80 Molecule	Protein Coding	43	GC03M119524	3.91
816	BGLAP	Bone Gamma-Carboxyglutamate Protein	Protein Coding	41	GC01P156242	3.91
817	PTPN11	Protein Tyrosine Phosphatase Non-Receptor Type 11	Protein Coding	55	GC12P112418	3.91
818	ADRB3	Adrenoceptor Beta 3	Protein Coding	46	GC08M037962	3.91
819	CD69	CD69 Molecule	Protein Coding	42	GC12M013363	3.91
820	SLC6A4	Solute Carrier Family 6 Member 4	Protein Coding	49	GC17M030194	3.89
821	COL5A1	Collagen Type V Alpha 1 Chain	Protein Coding	45	GC09P134641	3.89
822	IBSP	Integrin Binding Sialoprotein	Protein Coding	39	GC04P087799	3.89
823	PRKCE	Protein Kinase C Epsilon	Protein Coding	51	GC02P045651	3.88
824	PRDX5	Peroxiredoxin 5	Protein Coding	48	GC11P064317	3.88
825	DLL4	Delta Like Canonical Notch Ligand 4	Protein Coding	47	GC15P040929	3.88
826	ITGA5	Integrin Subunit Alpha 5	Protein Coding	50	GC12M054396	3.86
827	CTF1	Cardiotrophin 1	Protein Coding	41	GC16P030910	3.85
828	ATP2A2	ATPase Sarcoplasmic/Endoplasmic Reticulum Ca2+ Transporting 2	Protein Coding	52	GC12P110280	3.83
829	ICOS	Inducible T Cell Costimulator	Protein Coding	44	GC02P203937	3.83
830	KEAP1	Kelch Like ECH Associated Protein 1	Protein Coding	48	GC19M010486	3.82
831	DDX58	DExD/H-Box Helicase 58	Protein Coding	48	GC09M032455	3.8
832	TNFSF13B	TNF Superfamily Member 13b	Protein Coding	47	GC13P108251	3.8
833	PCSK2	Proprotein Convertase Subtilisin/Kexin Type 2	Protein Coding	42	GC20P017226	3.8
834	PRKAR1A	Protein Kinase CAMP-Dependent Type I Regulatory Subunit Alpha	Protein Coding	53	GC17P068414	3.8
835	CD79A	CD79a Molecule	Protein Coding	48	GC19P041877	3.8
836	CCR3	C-C Motif Chemokine Receptor 3	Protein Coding	48	GC03P046227	3.8
837	CTSD	Cathepsin D	Protein Coding	54	GC11M001752	3.8
838	ADRB1	Adrenoceptor Beta 1	Protein Coding	49	GC10P114044	3.8
839	ADAMTS13	ADAM Metallopeptidase With Thrombospondin Type 1 Motif 13	Protein Coding	47	GC09P133414	3.8
840	AVP	Arginine Vasopressin	Protein Coding	47	GC20M003082	3.8
841	TRPM7	Transient Receptor Potential Cation Channel Subfamily M Member 7	Protein Coding	47	GC15M050552	3.8
842	TIMP4	TIMP Metallopeptidase Inhibitor 4	Protein Coding	42	GC03M012153	3.8
843	DBN1	Drebrin 1	Protein Coding	41	GC05M177456	3.8
844	MIR199A1	MicroRNA 199a-1	RNA Gene	20	GC19M010792	3.8
845	SERPINF2	Serpin Family F Member 2	Protein Coding	45	GC17P001742	3.79
846	CYP19A1	Cytochrome P450 Family 19 Subfamily A Member 1	Protein Coding	50	GC15M051208	3.77
847	ILK	Integrin Linked Kinase	Protein Coding	48	GC11P006581	3.77
848	PROC	Protein C, Inactivator Of Coagulation Factors Va And VIIIa	Protein Coding	51	GC02P127418	3.76
849	SDC2	Syndecan 2	Protein Coding	47	GC08P096494	3.75
850	CD274	CD274 Molecule	Protein Coding	46	GC09P005450	3.75
851	KISS1R	KISS1 Receptor	Protein Coding	45	GC19P000917	3.75
852	KISS1	KiSS-1 Metastasis Suppressor	Protein Coding	43	GC01M204190	3.75
853	JAG1	Jagged Canonical Notch Ligand 1	Protein Coding	51	GC20M010637	3.74
854	TNFSF13	TNF Superfamily Member 13	Protein Coding	45	GC17P007558	3.74
855	MIR30E	MicroRNA 30e	RNA Gene	21	GC01P040754	3.74
856	TREM2	Triggering Receptor Expressed On Myeloid Cells 2	Protein Coding	44	GC06M041359	3.73
857	ANKH	ANKH Inorganic Pyrophosphate Transport Regulator	Protein Coding	41	GC05M014706	3.73
858	APOM	Apolipoprotein M	Protein Coding	41	GC06P033408	3.73
859	IKBKG	Inhibitor Of Nuclear Factor Kappa B Kinase Regulatory Subunit Gamma	Protein Coding	50	GC0XP154541	3.71
860	GNAS	GNAS Complex Locus	Protein Coding	53	GC20P058839	3.7
861	CTNNA1	Catenin Alpha 1	Protein Coding	49	GC05P138613	3.7
862	SERPING1	Serpin Family G Member 1	Protein Coding	48	GC11P057597	3.7
863	SCNN1A	Sodium Channel Epithelial 1 Subunit Alpha	Protein Coding	48	GC12M006346	3.7
864	ACTA1	Actin Alpha 1, Skeletal Muscle	Protein Coding	48	GC01M229431	3.7
865	C2	Complement C2	Protein Coding	45	GC06P031897	3.7
866	LAMA4	Laminin Subunit Alpha 4	Protein Coding	45	GC06M112107	3.7
867	CXCR5	C-X-C Motif Chemokine Receptor 5	Protein Coding	43	GC11P118892	3.7
868	IGF2-AS	IGF2 Antisense RNA	RNA Gene	25	GC11P002140	3.7
869	MIR99A	MicroRNA 99a	RNA Gene	21	GC21P016539	3.7
870	IL12A	Interleukin 12A	Protein Coding	45	GC03P159988	3.69
871	CD46	CD46 Molecule	Protein Coding	48	GC01P207752	3.67
872	IL6R	Interleukin 6 Receptor	Protein Coding	50	GC01P154405	3.67
873	CXCR2	C-X-C Motif Chemokine Receptor 2	Protein Coding	50	GC02P218125	3.66
874	AGXT2	Alanine--Glyoxylate Aminotransferase 2	Protein Coding	41	GC05M034998	3.66
875	SRA1	Steroid Receptor RNA Activator 1	Protein Coding	39	GC05M140537	3.65
876	PSRC1	Proline And Serine Rich Coiled-Coil 1	Protein Coding	39	GC01M109279	3.65
877	MACROD2	Mono-ADP Ribosylhydrolase 2	Protein Coding	36	GC20P013925	3.65
878	FLT1	Fms Related Receptor Tyrosine Kinase 1	Protein Coding	52	GC13M028300	3.64
879	RSAD2	Radical S-Adenosyl Methionine Domain Containing 2	Protein Coding	40	GC02P006865	3.63
880	MAPK12	Mitogen-Activated Protein Kinase 12	Protein Coding	49	GC22M050246	3.62
881	CFI	Complement Factor I	Protein Coding	48	GC04M109740	3.61
882	NOTCH2	Notch Receptor 2	Protein Coding	51	GC01M119911	3.6
883	JUP	Junction Plakoglobin	Protein Coding	48	GC17M041754	3.6
884	CD70	CD70 Molecule	Protein Coding	45	GC19M006583	3.6
885	CXADR	CXADR Ig-Like Cell Adhesion Molecule	Protein Coding	43	GC21P017512	3.6
886	FCN2	Ficolin 2	Protein Coding	41	GC09P134864	3.6
887	CTNNA3	Catenin Alpha 3	Protein Coding	40	GC10M065912	3.6
888	CHKB	Choline Kinase Beta	Protein Coding	47	GC22M050578	3.58
889	SNCA	Synuclein Alpha	Protein Coding	51	GC04M089724	3.57
890	ATXN3	Ataxin 3	Protein Coding	45	GC14M093534	3.57
891	OAS1	2'-5'-Oligoadenylate Synthetase 1	Protein Coding	46	GC12P112906	3.57
892	ENO1	Enolase 1	Protein Coding	48	GC01M008861	3.54
893	IFIH1	Interferon Induced With Helicase C Domain 1	Protein Coding	49	GC02M162267	3.54
894	TAT	Tyrosine Aminotransferase	Protein Coding	45	GC16M071565	3.54
895	SLAMF7	SLAM Family Member 7	Protein Coding	43	GC01P160709	3.54
896	HAVCR1	Hepatitis A Virus Cellular Receptor 1	Protein Coding	43	GC05M157007	3.54
897	HS3ST1	Heparan Sulfate-Glucosamine 3-Sulfotransferase 1	Protein Coding	43	GC04M011394	3.54
898	GPIHBP1	Glycosylphosphatidylinositol Anchored High Density Lipoprotein Binding Protein 1	Protein Coding	36	GC08P143213	3.54
899	CCDC92	Coiled-Coil Domain Containing 92	Protein Coding	36	GC12M123918	3.54
900	TBK1	TANK Binding Kinase 1	Protein Coding	51	GC12P064451	3.5
901	ACAT1	Acetyl-CoA Acetyltransferase 1	Protein Coding	51	GC11P108121	3.5
902	BCHE	Butyrylcholinesterase	Protein Coding	50	GC03M165772	3.5
903	BACE1	Beta-Secretase 1	Protein Coding	48	GC11M117285	3.5
904	MIR125A	MicroRNA 125a	RNA Gene	21	GC19P051723	3.5
905	EGR1	Early Growth Response 1	Protein Coding	45	GC05P138465	3.49
906	MMP14	Matrix Metallopeptidase 14	Protein Coding	52	GC14P025005	3.48
907	NEBL	Nebulette	Protein Coding	39	GC10M020779	3.47
908	PGM1	Phosphoglucomutase 1	Protein Coding	49	GC01P063593	3.45
909	HLA-DPB1	Major Histocompatibility Complex, Class II, DP Beta 1	Protein Coding	45	GC06P033447	3.45
910	MMACHC	Metabolism Of Cobalamin Associated C	Protein Coding	43	GC01P045500	3.45
911	HLA-DPA1	Major Histocompatibility Complex, Class II, DP Alpha 1	Protein Coding	42	GC06M033064	3.45
912	ALPL	Alkaline Phosphatase, Biomineralization Associated	Protein Coding	52	GC01P021508	3.45
913	GBA	Glucosylceramidase Beta	Protein Coding	49	GC01M155234	3.45
914	HTR1A	5-Hydroxytryptamine Receptor 1A	Protein Coding	48	GC05M063960	3.45
915	ABCC8	ATP Binding Cassette Subfamily C Member 8	Protein Coding	47	GC11M017392	3.45
916	TUBA4A	Tubulin Alpha 4a	Protein Coding	47	GC02M219249	3.45
917	CHMP2B	Charged Multivesicular Body Protein 2B	Protein Coding	45	GC03P087277	3.45
918	PPIG	Peptidylprolyl Isomerase G	Protein Coding	43	GC02P169584	3.45
919	TNFSF10	TNF Superfamily Member 10	Protein Coding	48	GC03M172505	3.42
920	HTR3A	5-Hydroxytryptamine Receptor 3A	Protein Coding	47	GC11P113974	3.42
921	ANGPTL4	Angiopoietin Like 4	Protein Coding	47	GC19P008363	3.4
922	IL20	Interleukin 20	Protein Coding	41	GC01P206866	3.39
923	KLF4	Kruppel Like Factor 4	Protein Coding	47	GC09M107484	3.38
924	UCHL1	Ubiquitin C-Terminal Hydrolase L1	Protein Coding	53	GC04P041256	3.38
925	GATA4	GATA Binding Protein 4	Protein Coding	50	GC08P011676	3.38
926	CHAT	Choline O-Acetyltransferase	Protein Coding	49	GC10P049609	3.38
927	TLR8	Toll Like Receptor 8	Protein Coding	49	GC0XP012924	3.38
928	PARK7	Parkinsonism Associated Deglycase	Protein Coding	47	GC01P007968	3.38
929	HNRNPA2B1	Heterogeneous Nuclear Ribonucleoprotein A2/B1	Protein Coding	47	GC07M026174	3.38
930	CHRM1	Cholinergic Receptor Muscarinic 1	Protein Coding	47	GC11M063096	3.38
931	ATXN2	Ataxin 2	Protein Coding	47	GC12M111443	3.38
932	CKM	Creatine Kinase, M-Type	Protein Coding	46	GC19M045306	3.38
933	HCRT	Hypocretin Neuropeptide Precursor	Protein Coding	42	GC17M042185	3.38
934	FBN2	Fibrillin 2	Protein Coding	42	GC05M128257	3.38
935	SUPT3H	SPT3 Homolog, SAGA And STAGA Complex Component	Protein Coding	40	GC06M044807	3.38
936	EGFL7	EGF Like Domain Multiple 7	Protein Coding	39	GC09P136658	3.38
937	MIR423	MicroRNA 423	RNA Gene	18	GC17P030117	3.38
938	MIR486-1	MicroRNA 486-1	RNA Gene	17	GC08M041660	3.38
939	F10	Coagulation Factor X	Protein Coding	49	GC13P113122	3.36
940	GSTM3	Glutathione S-Transferase Mu 3	Protein Coding	47	GC01M109733	3.36
941	GSTM2	Glutathione S-Transferase Mu 2	Protein Coding	42	GC01P109668	3.36
942	GSTM4	Glutathione S-Transferase Mu 4	Protein Coding	42	GC01P109657	3.36
943	GSTM5	Glutathione S-Transferase Mu 5	Protein Coding	42	GC01P109711	3.36
944	ARID5B	AT-Rich Interaction Domain 5B	Protein Coding	41	GC10P061901	3.36
945	ITGAX	Integrin Subunit Alpha X	Protein Coding	45	GC16P031432	3.35
946	BDKRB2	Bradykinin Receptor B2	Protein Coding	45	GC14P096205	3.35
947	NQO1	NAD(P)H Quinone Dehydrogenase 1	Protein Coding	51	GC16M069706	3.34
948	KIF6	Kinesin Family Member 6	Protein Coding	38	GC06M041324	3.34
949	FABP2	Fatty Acid Binding Protein 2	Protein Coding	44	GC04M119317	3.33
950	TERT	Telomerase Reverse Transcriptase	Protein Coding	53	GC05M001253	3.32
951	UCP2	Uncoupling Protein 2	Protein Coding	47	GC11M073974	3.31
952	PLAUR	Plasminogen Activator, Urokinase Receptor	Protein Coding	46	GC19M043646	3.31
953	NF2	Neurofibromin 2	Protein Coding	50	GC22P029603	3.3
954	TBX21	T-Box Transcription Factor 21	Protein Coding	47	GC17P047733	3.3
955	PROM1	Prominin 1	Protein Coding	46	GC04M015965	3.3
956	PTK2	Protein Tyrosine Kinase 2	Protein Coding	49	GC08M140657	3.3
957	LGALS1	Galectin 1	Protein Coding	45	GC22P037675	3.28
958	AHR	Aryl Hydrocarbon Receptor	Protein Coding	50	GC07P016916	3.27
959	ADCY10	Adenylate Cyclase 10	Protein Coding	45	GC01M167809	3.25
960	FGF21	Fibroblast Growth Factor 21	Protein Coding	41	GC19P048764	3.24
961	ALOX12	Arachidonate 12-Lipoxygenase, 12S Type	Protein Coding	45	GC17P006995	3.22
962	GCKR	Glucokinase Regulator	Protein Coding	42	GC02P027496	3.22
963	TH	Tyrosine Hydroxylase	Protein Coding	53	GC11M002163	3.22
964	DRD2	Dopamine Receptor D2	Protein Coding	52	GC11M113409	3.22
965	KCNH2	Potassium Voltage-Gated Channel Subfamily H Member 2	Protein Coding	51	GC07M150944	3.22
966	SLC6A3	Solute Carrier Family 6 Member 3	Protein Coding	51	GC05M001392	3.22
967	GRIA3	Glutamate Ionotropic Receptor AMPA Type Subunit 3	Protein Coding	51	GC0XP123184	3.22
968	LRRK2	Leucine Rich Repeat Kinase 2	Protein Coding	51	GC12P040196	3.22
969	IDE	Insulin Degrading Enzyme	Protein Coding	50	GC10M092451	3.22
970	KCNJ2	Potassium Inwardly Rectifying Channel Subfamily J Member 2	Protein Coding	49	GC17P070168	3.22
971	TBP	TATA-Box Binding Protein	Protein Coding	49	GC06P170554	3.22
972	PINK1	PTEN Induced Kinase 1	Protein Coding	48	GC01P020634	3.22
973	ABCA3	ATP Binding Cassette Subfamily A Member 3	Protein Coding	48	GC16M002275	3.22
974	ARSA	Arylsulfatase A	Protein Coding	48	GC22M050622	3.22
975	SERPINI1	Serpin Family I Member 1	Protein Coding	47	GC03P167735	3.22
976	TARDBP	TAR DNA Binding Protein	Protein Coding	47	GC01P011013	3.22
977	CSTB	Cystatin B	Protein Coding	47	GC21M043772	3.22
978	GPD1	Glycerol-3-Phosphate Dehydrogenase 1	Protein Coding	47	GC12P050105	3.22
979	HNRNPA1	Heterogeneous Nuclear Ribonucleoprotein A1	Protein Coding	47	GC12P054280	3.22
980	MYL3	Myosin Light Chain 3	Protein Coding	46	GC03M046836	3.22
981	ABCB11	ATP Binding Cassette Subfamily B Member 11	Protein Coding	46	GC02M168922	3.22
982	ABCB4	ATP Binding Cassette Subfamily B Member 4	Protein Coding	46	GC07M087401	3.22
983	SMAD6	SMAD Family Member 6	Protein Coding	46	GC15P066702	3.22
984	KCNE1	Potassium Voltage-Gated Channel Subfamily E Regulatory Subunit 1	Protein Coding	45	GC21M034446	3.22
985	HTT	Huntingtin	Protein Coding	45	GC04P003041	3.22
986	CRH	Corticotropin Releasing Hormone	Protein Coding	45	GC08M066176	3.22
987	FUS	FUS RNA Binding Protein	Protein Coding	45	GC16P031418	3.22
988	ATXN1	Ataxin 1	Protein Coding	45	GC06M016299	3.22
989	ATN1	Atrophin 1	Protein Coding	45	GC12P007874	3.22
990	FDXR	Ferredoxin Reductase	Protein Coding	45	GC17M074862	3.22
991	BRD4	Bromodomain Containing 4	Protein Coding	45	GC19M015236	3.22
992	EFEMP2	EGF Containing Fibulin Extracellular Matrix Protein 2	Protein Coding	44	GC11M065867	3.22
993	SCN4B	Sodium Voltage-Gated Channel Beta Subunit 4	Protein Coding	44	GC11M118134	3.22
994	SNCAIP	Synuclein Alpha Interacting Protein	Protein Coding	44	GC05P122311	3.22
995	SNCB	Synuclein Beta	Protein Coding	44	GC05M176620	3.22
996	SNCG	Synuclein Gamma	Protein Coding	44	GC10P086957	3.22
997	PLP1	Proteolipid Protein 1	Protein Coding	44	GC0XP103773	3.22
998	SNTA1	Syntrophin Alpha 1	Protein Coding	44	GC20M033407	3.22
999	PPOX	Protoporphyrinogen Oxidase	Protein Coding	44	GC01P161167	3.22
1000	ITM2B	Integral Membrane Protein 2B	Protein Coding	44	GC13P048233	3.22
1001	DAB2	DAB Adaptor Protein 2	Protein Coding	44	GC05M039371	3.22
1002	AGRP	Agouti Related Neuropeptide	Protein Coding	44	GC16M067482	3.22
1003	MAP2	Microtubule Associated Protein 2	Protein Coding	44	GC02P209424	3.22
1004	APBB1	Amyloid Beta Precursor Protein Binding Family B Member 1	Protein Coding	44	GC11M006396	3.22
1005	TNNT1	Troponin T1, Slow Skeletal Type	Protein Coding	44	GC19M055132	3.22
1006	TYROBP	Transmembrane Immune Signaling Adaptor TYROBP	Protein Coding	44	GC19M035904	3.22
1007	UBQLN2	Ubiquilin 2	Protein Coding	44	GC0XP056563	3.22
1008	NDE1	NudE Neurodevelopment Protein 1	Protein Coding	43	GC16P015663	3.22
1009	AKAP9	A-Kinase Anchoring Protein 9	Protein Coding	43	GC07P091940	3.22
1010	ATP13A2	ATPase Cation Transporting 13A2	Protein Coding	43	GC01M016985	3.22
1011	BMP3	Bone Morphogenetic Protein 3	Protein Coding	43	GC04P081030	3.22
1012	BMP5	Bone Morphogenetic Protein 5	Protein Coding	43	GC06M055728	3.22
1013	ANK2	Ankyrin 2	Protein Coding	43	GC04P112818	3.22
1014	EPM2A	EPM2A Glucan Phosphatase, Laforin	Protein Coding	43	GC06M145382	3.22
1015	CLN5	CLN5 Intracellular Trafficking Protein	Protein Coding	42	GC13P076990	3.22
1016	COL5A2	Collagen Type V Alpha 2 Chain	Protein Coding	42	GC02M189031	3.22
1017	JPH3	Junctophilin 3	Protein Coding	42	GC16P087601	3.22
1018	KCNE2	Potassium Voltage-Gated Channel Subfamily E Regulatory Subunit 2	Protein Coding	41	GC21P034364	3.22
1019	PRKN	Parkin RBR E3 Ubiquitin Protein Ligase	Protein Coding	41	GC06M161348	3.22
1020	PLAG1	PLAG1 Zinc Finger	Protein Coding	41	GC08M056161	3.22
1021	SPAST	Spastin	Protein Coding	41	GC02P032063	3.22
1022	SPG21	SPG21 Abhydrolase Domain Containing, Maspardin	Protein Coding	41	GC15M064963	3.22
1023	NHLRC1	NHL Repeat Containing E3 Ubiquitin Protein Ligase 1	Protein Coding	41	GC06M018065	3.22
1024	LTBP4	Latent Transforming Growth Factor Beta Binding Protein 4	Protein Coding	41	GC19P040592	3.22
1025	ATP8B1	ATPase Phospholipid Transporting 8B1	Protein Coding	41	GC18M057646	3.22
1026	MICU1	Mitochondrial Calcium Uptake 1	Protein Coding	40	GC10M072367	3.22
1027	CHCHD10	Coiled-Coil-Helix-Coiled-Coil-Helix Domain Containing 10	Protein Coding	40	GC22M023765	3.22
1028	TRIM9	Tripartite Motif Containing 9	Protein Coding	40	GC14M050975	3.22
1029	TMEM106B	Transmembrane Protein 106B	Protein Coding	39	GC07P012217	3.22
1030	DCAF8	DDB1 And CUL4 Associated Factor 8	Protein Coding	39	GC01M160215	3.22
1031	EXOSC4	Exosome Component 4	Protein Coding	37	GC08P144079	3.22
1032	APEX2	Apurinic/Apyrimidinic Endodeoxyribonuclease 2	Protein Coding	37	GC0XP055000	3.22
1033	SLC39A2	Solute Carrier Family 39 Member 2	Protein Coding	37	GC14P021146	3.22
1034	SSNA1	SS Nuclear Autoantigen 1	Protein Coding	36	GC09P137188	3.22
1035	MACROD1	Mono-ADP Ribosylhydrolase 1	Protein Coding	36	GC11M063998	3.22
1036	ZBTB8OS	Zinc Finger And BTB Domain Containing 8 Opposite Strand	Protein Coding	36	GC01M032600	3.22
1037	ZNHIT3	Zinc Finger HIT-Type Containing 3	Protein Coding	36	GC17P036486	3.22
1038	OARD1	O-Acyl-ADP-Ribose Deacylase 1	Protein Coding	35	GC06M041354	3.22
1039	PCSK1N	Proprotein Convertase Subtilisin/Kexin Type 1 Inhibitor	Protein Coding	34	GC0XM048831	3.22
1040	EIF1AD	Eukaryotic Translation Initiation Factor 1A Domain Containing	Protein Coding	34	GC11M065996	3.22
1041	MT-ND1	Mitochondrially Encoded NADH:Ubiquinone Oxidoreductase Core Subunit 1	Protein Coding	34	GCMTP003309	3.22
1042	C1orf21	Chromosome 1 Open Reading Frame 21	Protein Coding	34	GC01P184356	3.22
1043	GRAMD1C	GRAM Domain Containing 1C	Protein Coding	33	GC03P113828	3.22
1044	MT-ATP6	Mitochondrially Encoded ATP Synthase Membrane Subunit 6	Protein Coding	33	GCMTP008531	3.22
1045	CHURC1	Churchill Domain Containing 1	Protein Coding	33	GC14P064915	3.22
1046	NOMO1	NODAL Modulator 1	Protein Coding	33	GC16P015037	3.22
1047	PARPBP	PARP1 Binding Protein	Protein Coding	32	GC12P102120	3.22
1048	RETREG1	Reticulophagy Regulator 1	Protein Coding	32	GC05M016472	3.22
1049	NOMO2	NODAL Modulator 2	Protein Coding	32	GC16M018459	3.22
1050	NOMO3	NODAL Modulator 3	Protein Coding	32	GC16P016232	3.22
1051	ADPRS	ADP-Ribosylserine Hydrolase	Protein Coding	31	GC01P036089	3.22
1052	MIR659	MicroRNA 659	RNA Gene	18	GC22M044777	3.22
1053	HIF1A-AS1	HIF1A Antisense RNA 1	RNA Gene	16	GC14M061681	3.22
1054	SMIM35	Small Integral Membrane Protein 35	Protein Coding	13	GC11M118003	3.22
1055	SLC12A5-AS1	SLC12A5 And MMP9 Antisense RNA 1	RNA Gene	12	GC20M046015	3.22
1056	LOC100506472	Uncharacterized LOC100506472	RNA Gene	8	GC22P039432	3.22
1057	LOC102723692	Uncharacterized LOC102723692	RNA Gene	5	GC16P017134	3.22
1058	LOC109504728	Chromosome 9 Open Reading Frame 72 Repeat Instability Region	Biological Region	2	GC09U902947	3.22
1059	BSG	Basigin (Ok Blood Group)	Protein Coding	45	GC19P000571	3.22
1060	PLA2G10	Phospholipase A2 Group X	Protein Coding	44	GC16M014672	3.21
1061	ESR2	Estrogen Receptor 2	Protein Coding	51	GC14M064084	3.21
1062	SAA4	Serum Amyloid A4, Constitutive	Protein Coding	40	GC11M018234	3.21
1063	CASP8	Caspase 8	Protein Coding	54	GC02P201233	3.2
1064	PLAU	Plasminogen Activator, Urokinase	Protein Coding	53	GC10P073909	3.2
1065	TET2	Tet Methylcytosine Dioxygenase 2	Protein Coding	45	GC04P105145	3.19
1066	IRF1	Interferon Regulatory Factor 1	Protein Coding	49	GC05M132481	3.18
1067	HSP90B1	Heat Shock Protein 90 Beta Family Member 1	Protein Coding	47	GC12P103930	3.18
1068	ANGPT2	Angiopoietin 2	Protein Coding	46	GC08M006499	3.17
1069	COL8A1	Collagen Type VIII Alpha 1 Chain	Protein Coding	40	GC03P099638	3.16
1070	CHST2	Carbohydrate Sulfotransferase 2	Protein Coding	39	GC03P143119	3.16
1071	IFNA1	Interferon Alpha 1	Protein Coding	40	GC09P021478	3.16
1072	SYK	Spleen Associated Tyrosine Kinase	Protein Coding	51	GC09P091113	3.16
1073	MIR223	MicroRNA 223	RNA Gene	22	GC0XP066018	3.16
1074	NCF2	Neutrophil Cytosolic Factor 2	Protein Coding	48	GC01M183524	3.15
1075	BMP2	Bone Morphogenetic Protein 2	Protein Coding	48	GC20P006696	3.15
1076	CR1	Complement C3b/C4b Receptor 1 (Knops Blood Group)	Protein Coding	45	GC01P207496	3.13
1077	CSK	C-Terminal Src Kinase	Protein Coding	49	GC15P074782	3.13
1078	STAR	Steroidogenic Acute Regulatory Protein	Protein Coding	47	GC08M038145	3.13
1079	PRKCB	Protein Kinase C Beta	Protein Coding	49	GC16P023872	3.13
1080	IL37	Interleukin 37	Protein Coding	39	GC02P114902	3.12
1081	CDH2	Cadherin 2	Protein Coding	51	GC18M027950	3.11
1082	PNPLA2	Patatin Like Phospholipase Domain Containing 2	Protein Coding	45	GC11P000884	3.11
1083	CCDC71L	Coiled-Coil Domain Containing 71 Like	Protein Coding	29	GC07M106656	3.1
1084	MAP3K5	Mitogen-Activated Protein Kinase Kinase Kinase 5	Protein Coding	49	GC06M136557	3.1
1085	IFNB1	Interferon Beta 1	Protein Coding	43	GC09M021077	3.09
1086	AEBP1	AE Binding Protein 1	Protein Coding	40	GC07P044106	3.09
1087	MIR320A	MicroRNA 320a	RNA Gene	20	GC08M022245	3.09
1088	SERPINA12	Serpin Family A Member 12	Protein Coding	40	GC14M094487	3.09
1089	CPB2	Carboxypeptidase B2	Protein Coding	46	GC13M046053	3.08
1090	AKR1B1	Aldo-Keto Reductase Family 1 Member B	Protein Coding	49	GC07M134442	3.07
1091	CCR6	C-C Motif Chemokine Receptor 6	Protein Coding	46	GC06P167111	3.05
1092	C1QA	Complement C1q A Chain	Protein Coding	46	GC01P022636	3.05
1093	MIR195	MicroRNA 195	RNA Gene	20	GC17M007018	3.05
1094	NR4A3	Nuclear Receptor Subfamily 4 Group A Member 3	Protein Coding	47	GC09P099821	3.04
1095	PIK3R1	Phosphoinositide-3-Kinase Regulatory Subunit 1	Protein Coding	52	GC05P068215	3.04
1096	MAPK9	Mitogen-Activated Protein Kinase 9	Protein Coding	50	GC05M180234	3.04
1097	LYN	LYN Proto-Oncogene, Src Family Tyrosine Kinase	Protein Coding	51	GC08P055879	3.02
1098	NPR2	Natriuretic Peptide Receptor 2	Protein Coding	48	GC09P035755	3.02
1099	PDE5A	Phosphodiesterase 5A	Protein Coding	46	GC04M119494	3.02
1100	PRKCZ	Protein Kinase C Zeta	Protein Coding	50	GC01P002050	3
1101	SOX9	SRY-Box Transcription Factor 9	Protein Coding	48	GC17P072121	3
1102	HBG2	Hemoglobin Subunit Gamma 2	Protein Coding	43	GC11M005349	2.99
1103	MIR134	MicroRNA 134	RNA Gene	19	GC14P104437	2.99
1104	TNFRSF11A	TNF Receptor Superfamily Member 11a	Protein Coding	47	GC18P062325	2.95
1105	TBX20	T-Box Transcription Factor 20	Protein Coding	43	GC07M035237	2.95
1106	MIR575	MicroRNA 575	RNA Gene	16	GC04M082753	2.95
1107	CYP3A5	Cytochrome P450 Family 3 Subfamily A Member 5	Protein Coding	48	GC07M099648	2.93
1108	ITGA1	Integrin Subunit Alpha 1	Protein Coding	43	GC05P052788	2.93
1109	MIR10A	MicroRNA 10a	RNA Gene	21	GC17M048579	2.92
1110	HDAC9	Histone Deacetylase 9	Protein Coding	48	GC07P018086	2.91
1111	LEPR	Leptin Receptor	Protein Coding	51	GC01P065421	2.91
1112	IL2RB	Interleukin 2 Receptor Subunit Beta	Protein Coding	50	GC22M037125	2.91
1113	TLR5	Toll Like Receptor 5	Protein Coding	49	GC01M223109	2.91
1114	TXNRD2	Thioredoxin Reductase 2	Protein Coding	48	GC22M019863	2.91
1115	NOTCH4	Notch Receptor 4	Protein Coding	47	GC06M032407	2.91
1116	CTSG	Cathepsin G	Protein Coding	46	GC14M024573	2.91
1117	P2RY1	Purinergic Receptor P2Y1	Protein Coding	45	GC03P152835	2.91
1118	HAVCR2	Hepatitis A Virus Cellular Receptor 2	Protein Coding	45	GC05M157063	2.91
1119	P2RX1	Purinergic Receptor P2X 1	Protein Coding	44	GC17M003896	2.91
1120	AIM2	Absent In Melanoma 2	Protein Coding	43	GC01M159062	2.91
1121	MYDGF	Myeloid Derived Growth Factor	Protein Coding	35	GC19M004641	2.91
1122	MIR185	MicroRNA 185	RNA Gene	22	GC22P020034	2.91
1123	VDR	Vitamin D Receptor	Protein Coding	53	GC12M047841	2.9
1124	HAMP	Hepcidin Antimicrobial Peptide	Protein Coding	44	GC19P037707	2.89
1125	SERPINA1	Serpin Family A Member 1	Protein Coding	51	GC14M094376	2.88
1126	CAPN10	Calpain 10	Protein Coding	42	GC02P240586	2.88
1127	CD68	CD68 Molecule	Protein Coding	41	GC17P007579	2.88
1128	MYC	MYC Proto-Oncogene, BHLH Transcription Factor	Protein Coding	53	GC08P127735	2.87
1129	RAC2	Rac Family Small GTPase 2	Protein Coding	52	GC22M037227	2.87
1130	MAP2K4	Mitogen-Activated Protein Kinase Kinase 4	Protein Coding	47	GC17P012020	2.87
1131	PIK3R3	Phosphoinositide-3-Kinase Regulatory Subunit 3	Protein Coding	45	GC01M046041	2.87
1132	HABP2	Hyaluronan Binding Protein 2	Protein Coding	44	GC10P113550	2.87
1133	LTB4R	Leukotriene B4 Receptor	Protein Coding	45	GC14P024311	2.86
1134	CD22	CD22 Molecule	Protein Coding	47	GC19P035319	2.85
1135	C1QC	Complement C1q C Chain	Protein Coding	45	GC01P022643	2.85
1136	HLA-DQA1	Major Histocompatibility Complex, Class II, DQ Alpha 1	Protein Coding	44	GC06P033442	2.85
1137	HLA-DOA	Major Histocompatibility Complex, Class II, DO Alpha	Protein Coding	42	GC06M033004	2.85
1138	STAP1	Signal Transducing Adaptor Family Member 1	Protein Coding	39	GC04P067558	2.85
1139	TRIB1	Tribbles Pseudokinase 1	Protein Coding	39	GC08P125430	2.85
1140	CLEC4C	C-Type Lectin Domain Family 4 Member C	Protein Coding	33	GC12M007695	2.85
1141	PDGFRA	Platelet Derived Growth Factor Receptor Alpha	Protein Coding	56	GC04P054229	2.84
1142	FOXO1	Forkhead Box O1	Protein Coding	50	GC13M040555	2.84
1143	S1PR2	Sphingosine-1-Phosphate Receptor 2	Protein Coding	46	GC19M010223	2.83
1144	FTO	FTO Alpha-Ketoglutarate Dependent Dioxygenase	Protein Coding	45	GC16P053737	2.82
1145	FURIN	Furin, Paired Basic Amino Acid Cleaving Enzyme	Protein Coding	48	GC15P090868	2.82
1146	IRS2	Insulin Receptor Substrate 2	Protein Coding	45	GC13M109752	2.81
1147	ACVR1	Activin A Receptor Type 1	Protein Coding	51	GC02M157736	2.81
1148	ACVR2A	Activin A Receptor Type 2A	Protein Coding	46	GC02P147844	2.81
1149	CTSS	Cathepsin S	Protein Coding	47	GC01M150730	2.79
1150	PINX1	PIN2 (TERF1) Interacting Telomerase Inhibitor 1	Protein Coding	40	GC08M010726	2.79
1151	COL1A1	Collagen Type I Alpha 1 Chain	Protein Coding	52	GC17M050183	2.79
1152	GAA	Glucosidase Alpha, Acid	Protein Coding	48	GC17P080101	2.79
1153	IFNAR1	Interferon Alpha And Beta Receptor Subunit 1	Protein Coding	47	GC21P033324	2.79
1154	NFATC4	Nuclear Factor Of Activated T Cells 4	Protein Coding	45	GC14P024365	2.79
1155	OXA1L	OXA1L Mitochondrial Inner Membrane Protein	Protein Coding	40	GC14P022766	2.79
1156	GRK2	G Protein-Coupled Receptor Kinase 2	Protein Coding	39	GC11P067266	2.79
1157	S100B	S100 Calcium Binding Protein B	Protein Coding	47	GC21M047166	2.78
1158	ATG5	Autophagy Related 5	Protein Coding	45	GC06M106045	2.78
1159	NFKBIA	NFKB Inhibitor Alpha	Protein Coding	51	GC14M035401	2.76
1160	USF1	Upstream Transcription Factor 1	Protein Coding	44	GC01M161039	2.76
1161	F11R	F11 Receptor	Protein Coding	45	GC01M160995	2.75
1162	ADAMTS1	ADAM Metallopeptidase With Thrombospondin Type 1 Motif 1	Protein Coding	45	GC21M026835	2.73
1163	IL16	Interleukin 16	Protein Coding	44	GC15P081159	2.73
1164	ADIPOR1	Adiponectin Receptor 1	Protein Coding	46	GC01M202940	2.72
1165	FCAMR	Fc Fragment Of IgA And IgM Receptor	Protein Coding	36	GC01M206957	2.71
1166	NRG1	Neuregulin 1	Protein Coding	49	GC08P031639	2.7
1167	CASP9	Caspase 9	Protein Coding	49	GC01M015491	2.7
1168	SERPINB2	Serpin Family B Member 2	Protein Coding	45	GC18P063871	2.7
1169	LTF	Lactotransferrin	Protein Coding	45	GC03M046435	2.7
1170	IL23R	Interleukin 23 Receptor	Protein Coding	46	GC01P067138	2.69
1171	ADAMTS7	ADAM Metallopeptidase With Thrombospondin Type 1 Motif 7	Protein Coding	40	GC15M078759	2.69
1172	PLA2G2D	Phospholipase A2 Group IID	Protein Coding	43	GC01M020111	2.69
1173	SERPINF1	Serpin Family F Member 1	Protein Coding	46	GC17P001761	2.68
1174	NECTIN2	Nectin Cell Adhesion Molecule 2	Protein Coding	38	GC19P044849	2.68
1175	SOST	Sclerostin	Protein Coding	45	GC17M043753	2.66
1176	PIGR	Polymeric Immunoglobulin Receptor	Protein Coding	43	GC01M206928	2.65
1177	BMPR1B	Bone Morphogenetic Protein Receptor Type 1B	Protein Coding	52	GC04P094757	2.65
1178	ASS1	Argininosuccinate Synthase 1	Protein Coding	50	GC09P130444	2.65
1179	CDKN1A	Cyclin Dependent Kinase Inhibitor 1A	Protein Coding	51	GC06P046057	2.64
1180	HSPA8	Heat Shock Protein Family A (Hsp70) Member 8	Protein Coding	48	GC11M123057	2.63
1181	NPR1	Natriuretic Peptide Receptor 1	Protein Coding	46	GC01P153691	2.63
1182	SLC8A1	Solute Carrier Family 8 Member A1	Protein Coding	45	GC02M040078	2.63
1183	CD247	CD247 Molecule	Protein Coding	50	GC01M167399	2.63
1184	GATA3	GATA Binding Protein 3	Protein Coding	50	GC10P008045	2.63
1185	POU5F1	POU Class 5 Homeobox 1	Protein Coding	48	GC06M031177	2.63
1186	FKBP1A	FKBP Prolyl Isomerase 1A	Protein Coding	48	GC20M001369	2.63
1187	SLC19A1	Solute Carrier Family 19 Member 1	Protein Coding	47	GC21M045493	2.63
1188	ADCY9	Adenylate Cyclase 9	Protein Coding	46	GC16M003953	2.63
1189	CD1D	CD1d Molecule	Protein Coding	44	GC01P158178	2.63
1190	ST3GAL4	ST3 Beta-Galactoside Alpha-2,3-Sialyltransferase 4	Protein Coding	43	GC11P126355	2.62
1191	TNFRSF9	TNF Receptor Superfamily Member 9	Protein Coding	45	GC01M007915	2.62
1192	TRPV4	Transient Receptor Potential Cation Channel Subfamily V Member 4	Protein Coding	51	GC12M109783	2.61
1193	CALM1	Calmodulin 1	Protein Coding	45	GC14P090396	2.61
1194	HPSE	Heparanase	Protein Coding	46	GC04M083292	2.61
1195	ITGA4	Integrin Subunit Alpha 4	Protein Coding	50	GC02P181456	2.6
1196	ACTN1	Actinin Alpha 1	Protein Coding	50	GC14M068874	2.6
1197	CFLAR	CASP8 And FADD Like Apoptosis Regulator	Protein Coding	48	GC02P201117	2.6
1198	GJA5	Gap Junction Protein Alpha 5	Protein Coding	47	GC01M147756	2.6
1199	TLN1	Talin 1	Protein Coding	43	GC09M035687	2.6
1200	MCAM	Melanoma Cell Adhesion Molecule	Protein Coding	41	GC11M119308	2.59
1201	ITLN1	Intelectin 1	Protein Coding	40	GC01M160876	2.59
1202	SH2B3	SH2B Adaptor Protein 3	Protein Coding	47	GC12P111405	2.59
1203	GDF2	Growth Differentiation Factor 2	Protein Coding	43	GC10P047322	2.59
1204	IRF2BP2	Interferon Regulatory Factor 2 Binding Protein 2	Protein Coding	37	GC01M234604	2.59
1205	DDAH2	Dimethylarginine Dimethylaminohydrolase 2	Protein Coding	44	GC06M031727	2.57
1206	MAP2K5	Mitogen-Activated Protein Kinase Kinase 5	Protein Coding	48	GC15P071835	2.57
1207	PIAS4	Protein Inhibitor Of Activated STAT 4	Protein Coding	44	GC19P004007	2.57
1208	SAMSN1	SAM Domain, SH3 Domain And Nuclear Localization Signals 1	Protein Coding	37	GC21M014485	2.57
1209	PDGFRB	Platelet Derived Growth Factor Receptor Beta	Protein Coding	56	GC05M150113	2.56
1210	GCK	Glucokinase	Protein Coding	52	GC07M044145	2.56
1211	TYK2	Tyrosine Kinase 2	Protein Coding	54	GC19M010350	2.55
1212	ANXA2	Annexin A2	Protein Coding	49	GC15M060347	2.55
1213	IRF3	Interferon Regulatory Factor 3	Protein Coding	48	GC19M049659	2.55
1214	ADRA2B	Adrenoceptor Alpha 2B	Protein Coding	47	GC02M096112	2.55
1215	ACTN4	Actinin Alpha 4	Protein Coding	47	GC19P038647	2.55
1216	CXCR1	C-X-C Motif Chemokine Receptor 1	Protein Coding	44	GC02M218162	2.55
1217	S100A1	S100 Calcium Binding Protein A1	Protein Coding	43	GC01P153627	2.55
1218	HOTTIP	HOXA Distal Transcript Antisense RNA	RNA Gene	24	GC07P027198	2.55
1219	MIR23A	MicroRNA 23a	RNA Gene	21	GC19M013988	2.55
1220	MIR200C	MicroRNA 200c	RNA Gene	21	GC12P007878	2.55
1221	MIR144	MicroRNA 144	RNA Gene	17	GC17M029703	2.55
1222	MIR663A	MicroRNA 663a	RNA Gene	16	GC20M026189	2.55
1223	TFAP2A	Transcription Factor AP-2 Alpha	Protein Coding	48	GC06M010393	2.54
1224	IL32	Interleukin 32	Protein Coding	41	GC16P004058	2.54
1225	ELAVL1	ELAV Like RNA Binding Protein 1	Protein Coding	43	GC19M007958	2.54
1226	MAP2K6	Mitogen-Activated Protein Kinase Kinase 6	Protein Coding	48	GC17P069414	2.52
1227	GSTO2	Glutathione S-Transferase Omega 2	Protein Coding	44	GC10P104268	2.52
1228	CALM3	Calmodulin 3	Protein Coding	43	GC19P046601	2.52
1229	ABO	ABO, Alpha 1-3-N-Acetylgalactosaminyltransferase And Alpha 1-3-Galactosyltransferase	Protein Coding	39	GC09M133250	2.51
1230	MIR92A1	MicroRNA 92a-1	RNA Gene	20	GC13P091420	2.5
1231	SMARCA2	SWI/SNF Related, Matrix Associated, Actin Dependent Regulator Of Chromatin, Subfamily A, Member 2	Protein Coding	51	GC09P001980	2.5
1232	CPT2	Carnitine Palmitoyltransferase 2	Protein Coding	50	GC01P053196	2.5
1233	HLA-A	Major Histocompatibility Complex, Class I, A	Protein Coding	48	GC06P033211	2.5
1234	CKB	Creatine Kinase B	Protein Coding	47	GC14M103519	2.5
1235	CYP1A2	Cytochrome P450 Family 1 Subfamily A Member 2	Protein Coding	47	GC15P074748	2.5
1236	HADHA	Hydroxyacyl-CoA Dehydrogenase Trifunctional Multienzyme Complex Subunit Alpha	Protein Coding	47	GC02M026190	2.5
1237	TFAM	Transcription Factor A, Mitochondrial	Protein Coding	45	GC10P058385	2.5
1238	PDCD10	Programmed Cell Death 10	Protein Coding	44	GC03M167683	2.5
1239	VASP	Vasodilator Stimulated Phosphoprotein	Protein Coding	44	GC19P045507	2.5
1240	FCGR1A	Fc Fragment Of IgG Receptor Ia	Protein Coding	43	GC01P149754	2.5
1241	KRIT1	KRIT1 Ankyrin Repeat Containing	Protein Coding	43	GC07M092198	2.5
1242	SRSF2	Serine And Arginine Rich Splicing Factor 2	Protein Coding	41	GC17M076734	2.5
1243	BRINP3	BMP/Retinoic Acid Inducible Neural Specific 3	Protein Coding	29	GC01M190067	2.5
1244	HSPA12B	Heat Shock Protein Family A (Hsp70) Member 12B	Protein Coding	36	GC20P003708	2.5
1245	G6PC2	Glucose-6-Phosphatase Catalytic Subunit 2	Protein Coding	39	GC02P168901	2.5
1246	RUNX2	RUNX Family Transcription Factor 2	Protein Coding	48	GC06P045327	2.49
1247	S100A12	S100 Calcium Binding Protein A12	Protein Coding	41	GC01M153346	2.48
1248	HNF1A	HNF1 Homeobox A	Protein Coding	47	GC12P120978	2.47
1249	SLC30A8	Solute Carrier Family 30 Member 8	Protein Coding	43	GC08P116950	2.46
1250	PRKAB1	Protein Kinase AMP-Activated Non-Catalytic Subunit Beta 1	Protein Coding	49	GC12P119632	2.46
1251	AKT3	AKT Serine/Threonine Kinase 3	Protein Coding	56	GC01M243488	2.45
1252	MAPK13	Mitogen-Activated Protein Kinase 13	Protein Coding	50	GC06P046048	2.45
1253	SUMO1	Small Ubiquitin Like Modifier 1	Protein Coding	48	GC02M202206	2.45
1254	HSP90AB1	Heat Shock Protein 90 Alpha Family Class B Member 1	Protein Coding	47	GC06P044246	2.45
1255	MAP2K7	Mitogen-Activated Protein Kinase Kinase 7	Protein Coding	47	GC19P007903	2.45
1256	GPC1	Glypican 1	Protein Coding	45	GC02P240435	2.45
1257	CAV3	Caveolin 3	Protein Coding	44	GC03P008733	2.45
1258	ACP5	Acid Phosphatase 5, Tartrate Resistant	Protein Coding	48	GC19M011574	2.44
1259	XBP1	X-Box Binding Protein 1	Protein Coding	47	GC22M028794	2.44
1260	ALOX15B	Arachidonate 15-Lipoxygenase Type B	Protein Coding	43	GC17P008039	2.44
1261	ERBB2	Erb-B2 Receptor Tyrosine Kinase 2	Protein Coding	56	GC17P039687	2.44
1262	LCK	LCK Proto-Oncogene, Src Family Tyrosine Kinase	Protein Coding	54	GC01P032251	2.44
1263	CYP17A1	Cytochrome P450 Family 17 Subfamily A Member 1	Protein Coding	50	GC10M102830	2.44
1264	MYL2	Myosin Light Chain 2	Protein Coding	50	GC12M110910	2.44
1265	HLA-DRA	Major Histocompatibility Complex, Class II, DR Alpha	Protein Coding	48	GC06P032439	2.44
1266	IRF7	Interferon Regulatory Factor 7	Protein Coding	48	GC11M000612	2.44
1267	RYR2	Ryanodine Receptor 2	Protein Coding	48	GC01P237042	2.44
1268	SLC25A4	Solute Carrier Family 25 Member 4	Protein Coding	48	GC04P185143	2.44
1269	IL10RA	Interleukin 10 Receptor Subunit Alpha	Protein Coding	47	GC11P117987	2.44
1270	CFL1	Cofilin 1	Protein Coding	47	GC11M065823	2.44
1271	ADRA1D	Adrenoceptor Alpha 1D	Protein Coding	47	GC20M004220	2.44
1272	BCL6	BCL6 Transcription Repressor	Protein Coding	47	GC03M187721	2.44
1273	FHL2	Four And A Half LIM Domains 2	Protein Coding	47	GC02M105343	2.44
1274	PRDM16	PR/SET Domain 16	Protein Coding	46	GC01P003068	2.44
1275	LARS2	Leucyl-TRNA Synthetase 2, Mitochondrial	Protein Coding	46	GC03P045405	2.44
1276	MTM1	Myotubularin 1	Protein Coding	45	GC0XP150562	2.44
1277	FOXP2	Forkhead Box P2	Protein Coding	45	GC07P114086	2.44
1278	IL17F	Interleukin 17F	Protein Coding	43	GC06M052209	2.44
1279	CCM2	CCM2 Scaffold Protein	Protein Coding	43	GC07P044999	2.44
1280	LGALS8	Galectin 8	Protein Coding	43	GC01P236518	2.44
1281	TRPV2	Transient Receptor Potential Cation Channel Subfamily V Member 2	Protein Coding	43	GC17P016415	2.44
1282	NPHS2	NPHS2 Stomatin Family Member, Podocin	Protein Coding	42	GC01M179519	2.44
1283	FBXO32	F-Box Protein 32	Protein Coding	41	GC08M123498	2.44
1284	LIMS1	LIM Zinc Finger Domain Containing 1	Protein Coding	41	GC02P108609	2.44
1285	ICOSLG	Inducible T Cell Costimulator Ligand	Protein Coding	40	GC21M044222	2.44
1286	GLMN	Glomulin, FKBP Associated Protein	Protein Coding	40	GC01M092246	2.44
1287	ARL15	ADP Ribosylation Factor Like GTPase 15	Protein Coding	37	GC05M053883	2.44
1288	RNPC3	RNA Binding Region (RNP1, RRM) Containing 3	Protein Coding	36	GC01P103525	2.44
1289	COQ10A	Coenzyme Q10A	Protein Coding	36	GC12P056266	2.44
1290	NEAT1	Nuclear Paraspeckle Assembly Transcript 1	RNA Gene	24	GC11P065418	2.44
1291	MIRLET7E	MicroRNA Let-7e	RNA Gene	21	GC19P051722	2.44
1292	MIR345	MicroRNA 345	RNA Gene	20	GC14P100307	2.44
1293	MIR638	MicroRNA 638	RNA Gene	18	GC19P010719	2.44
1294	MIR130B	MicroRNA 130b	RNA Gene	18	GC22P023989	2.44
1295	MIR133A1	MicroRNA 133a-1	RNA Gene	18	GC18M021826	2.44
1296	MIR505	MicroRNA 505	RNA Gene	17	GC0XM139924	2.44
1297	EGID-106632268	APOB 3' Scaffold/Matrix Attachment Region (S/MAR)	Biological Region	2	GC02U904436	2.44
1298	LOC106560211	APOB 5' Regulatory Region	Biological Region	2	GC02U904360	2.44
1299	IDO1	Indoleamine 2,3-Dioxygenase 1	Protein Coding	47	GC08P039891	2.44
1300	SLC9A1	Solute Carrier Family 9 Member A1	Protein Coding	52	GC01M027109	2.43
1301	RYR3	Ryanodine Receptor 3	Protein Coding	43	GC15P033310	2.43
1302	MIR30C2	MicroRNA 30c-2	RNA Gene	19	GC06M071382	2.43
1303	GLB1	Galactosidase Beta 1	Protein Coding	48	GC03M033013	2.43
1304	CDKN1B	Cyclin Dependent Kinase Inhibitor 1B	Protein Coding	50	GC12P012716	2.41
1305	GPBP1	GC-Rich Promoter Binding Protein 1	Protein Coding	35	GC05P057173	2.41
1306	LPAL2	Lipoprotein(A) Like 2, Pseudogene	Pseudogene	28	GC06M160453	2.41
1307	ADAMTS4	ADAM Metallopeptidase With Thrombospondin Type 1 Motif 4	Protein Coding	44	GC01M161184	2.4
1308	FADS1	Fatty Acid Desaturase 1	Protein Coding	44	GC11M061799	2.4
1309	GCH1	GTP Cyclohydrolase 1	Protein Coding	47	GC14M054842	2.38
1310	MMP10	Matrix Metallopeptidase 10	Protein Coding	48	GC11M102770	2.37
1311	CYP2E1	Cytochrome P450 Family 2 Subfamily E Member 1	Protein Coding	47	GC10P133520	2.37
1312	CXCR6	C-X-C Motif Chemokine Receptor 6	Protein Coding	41	GC03P045982	2.36
1313	ARG2	Arginase 2	Protein Coding	47	GC14P067619	2.35
1314	SUCNR1	Succinate Receptor 1	Protein Coding	41	GC03P151873	2.34
1315	IRS1	Insulin Receptor Substrate 1	Protein Coding	49	GC02M226731	2.34
1316	NOS1AP	Nitric Oxide Synthase 1 Adaptor Protein	Protein Coding	39	GC01P162069	2.33
1317	INSR	Insulin Receptor	Protein Coding	55	GC19M007112	2.32
1318	GHSR	Growth Hormone Secretagogue Receptor	Protein Coding	48	GC03M172443	2.32
1319	UTS2R	Urotensin 2 Receptor	Protein Coding	43	GC17P082374	2.32
1320	ADAMTSL1	ADAMTS Like 1	Protein Coding	42	GC09P017906	2.32
1321	FASN	Fatty Acid Synthase	Protein Coding	51	GC17M082078	2.32
1322	HBB	Hemoglobin Subunit Beta	Protein Coding	47	GC11M005334	2.31
1323	TRIB3	Tribbles Pseudokinase 3	Protein Coding	45	GC20P000361	2.3
1324	VEGFB	Vascular Endothelial Growth Factor B	Protein Coding	45	GC11P064234	2.3
1325	OSM	Oncostatin M	Protein Coding	44	GC22M030262	2.3
1326	PIK3CD	Phosphatidylinositol-4,5-Bisphosphate 3-Kinase Catalytic Subunit Delta	Protein Coding	54	GC01P009629	2.3
1327	BMPR1A	Bone Morphogenetic Protein Receptor Type 1A	Protein Coding	52	GC10P086756	2.3
1328	MAP3K7	Mitogen-Activated Protein Kinase Kinase Kinase 7	Protein Coding	52	GC06M090513	2.3
1329	PIK3R2	Phosphoinositide-3-Kinase Regulatory Subunit 2	Protein Coding	51	GC19P018153	2.3
1330	ACVR2B	Activin A Receptor Type 2B	Protein Coding	51	GC03P038453	2.3
1331	MAPK11	Mitogen-Activated Protein Kinase 11	Protein Coding	50	GC22M050263	2.3
1332	CALM2	Calmodulin 2	Protein Coding	47	GC02M047124	2.3
1333	ARHGEF2	Rho/Rac Guanine Nucleotide Exchange Factor 2	Protein Coding	47	GC01M155946	2.3
1334	TXN2	Thioredoxin 2	Protein Coding	47	GC22M036467	2.3
1335	RAC3	Rac Family Small GTPase 3	Protein Coding	46	GC17P082031	2.3
1336	GSTA3	Glutathione S-Transferase Alpha 3	Protein Coding	45	GC06M052896	2.3
1337	MGST1	Microsomal Glutathione S-Transferase 1	Protein Coding	44	GC12P016347	2.3
1338	MGST3	Microsomal Glutathione S-Transferase 3	Protein Coding	44	GC01P165600	2.3
1339	SUMO3	Small Ubiquitin Like Modifier 3	Protein Coding	43	GC21M044805	2.3
1340	GSTA1	Glutathione S-Transferase Alpha 1	Protein Coding	43	GC06M052791	2.3
1341	CALML3	Calmodulin Like 3	Protein Coding	43	GC10P005556	2.3
1342	MGST2	Microsomal Glutathione S-Transferase 2	Protein Coding	42	GC04P139665	2.3
1343	SUMO2	Small Ubiquitin Like Modifier 2	Protein Coding	41	GC17M075165	2.3
1344	GSTA2	Glutathione S-Transferase Alpha 2	Protein Coding	41	GC06M052750	2.3
1345	SUMO4	Small Ubiquitin Like Modifier 4	Protein Coding	39	GC06P149401	2.3
1346	CALML5	Calmodulin Like 5	Protein Coding	39	GC10M005498	2.3
1347	GSTT2	Glutathione S-Transferase Theta 2 (Gene/Pseudogene)	Protein Coding	37	GC22P023980	2.3
1348	GSTA5	Glutathione S-Transferase Alpha 5	Protein Coding	37	GC06M052831	2.3
1349	GSTT2B	Glutathione S-Transferase Theta 2B (Gene/Pseudogene)	Protein Coding	35	GC22M023957	2.3
1350	CALML4	Calmodulin Like 4	Protein Coding	35	GC15M068190	2.3
1351	CALML6	Calmodulin Like 6	Protein Coding	33	GC01P001914	2.3
1352	CNR2	Cannabinoid Receptor 2	Protein Coding	47	GC01M023870	2.28
1353	PLIN2	Perilipin 2	Protein Coding	44	GC09M019112	2.28
1354	GRIN2A	Glutamate Ionotropic Receptor NMDA Type Subunit 2A	Protein Coding	52	GC16M009753	2.28
1355	NR5A1	Nuclear Receptor Subfamily 5 Group A Member 1	Protein Coding	50	GC09M124481	2.28
1356	PAH	Phenylalanine Hydroxylase	Protein Coding	50	GC12M102836	2.28
1357	CYP11A1	Cytochrome P450 Family 11 Subfamily A Member 1	Protein Coding	50	GC15M074337	2.28
1358	CD19	CD19 Molecule	Protein Coding	50	GC16P028943	2.28
1359	FSHR	Follicle Stimulating Hormone Receptor	Protein Coding	50	GC02M048866	2.28
1360	CACNA1A	Calcium Voltage-Gated Channel Subunit Alpha1 A	Protein Coding	50	GC19M013206	2.28
1361	CAMK2D	Calcium/Calmodulin Dependent Protein Kinase II Delta	Protein Coding	50	GC04M113452	2.28
1362	WT1	WT1 Transcription Factor	Protein Coding	50	GC11M032365	2.28
1363	SMO	Smoothened, Frizzled Class Receptor	Protein Coding	50	GC07P129303	2.28
1364	PDE3A	Phosphodiesterase 3A	Protein Coding	50	GC12P020294	2.28
1365	SOS1	SOS Ras/Rac Guanine Nucleotide Exchange Factor 1	Protein Coding	49	GC02M038981	2.28
1366	ADCY5	Adenylate Cyclase 5	Protein Coding	49	GC03M123282	2.28
1367	ADCY6	Adenylate Cyclase 6	Protein Coding	49	GC12M048766	2.28
1368	ATP1A2	ATPase Na+/K+ Transporting Subunit Alpha 2	Protein Coding	49	GC01P160085	2.28
1369	ATP2A1	ATPase Sarcoplasmic/Endoplasmic Reticulum Ca2+ Transporting 1	Protein Coding	49	GC16P028891	2.28
1370	RBPJ	Recombination Signal Binding Protein For Immunoglobulin Kappa J Region	Protein Coding	48	GC04P026165	2.28
1371	SLC22A5	Solute Carrier Family 22 Member 5	Protein Coding	48	GC05P132369	2.28
1372	HSD17B4	Hydroxysteroid 17-Beta Dehydrogenase 4	Protein Coding	48	GC05P119452	2.28
1373	ISG15	ISG15 Ubiquitin Like Modifier	Protein Coding	48	GC01P001001	2.28
1374	ITGA7	Integrin Subunit Alpha 7	Protein Coding	48	GC12M055684	2.28
1375	CACNA1D	Calcium Voltage-Gated Channel Subunit Alpha1 D	Protein Coding	48	GC03P053328	2.28
1376	DAG1	Dystroglycan 1	Protein Coding	48	GC03P049482	2.28
1377	HCN4	Hyperpolarization Activated Cyclic Nucleotide Gated Potassium Channel 4	Protein Coding	48	GC15M073319	2.28
1378	RYR1	Ryanodine Receptor 1	Protein Coding	48	GC19P038434	2.28
1379	SDHA	Succinate Dehydrogenase Complex Flavoprotein Subunit A	Protein Coding	48	GC05P000208	2.28
1380	CHRM2	Cholinergic Receptor Muscarinic 2	Protein Coding	48	GC07P136868	2.28
1381	GALT	Galactose-1-Phosphate Uridylyltransferase	Protein Coding	48	GC09P034674	2.28
1382	CD8A	CD8a Molecule	Protein Coding	48	GC02M086784	2.28
1383	GATA6	GATA Binding Protein 6	Protein Coding	48	GC18P022169	2.28
1384	ADCY3	Adenylate Cyclase 3	Protein Coding	48	GC02M024819	2.28
1385	FAH	Fumarylacetoacetate Hydrolase	Protein Coding	48	GC15P080152	2.28
1386	C1R	Complement C1r	Protein Coding	48	GC12M007110	2.28
1387	CACNA1S	Calcium Voltage-Gated Channel Subunit Alpha1 S	Protein Coding	48	GC01M201008	2.28
1388	CACNB2	Calcium Voltage-Gated Channel Auxiliary Subunit Beta 2	Protein Coding	48	GC10P018165	2.28
1389	TNFRSF13B	TNF Receptor Superfamily Member 13B	Protein Coding	48	GC17M016929	2.28
1390	TYR	Tyrosinase	Protein Coding	48	GC11P089177	2.28
1391	UNG	Uracil DNA Glycosylase	Protein Coding	48	GC12P109097	2.28
1392	WNT4	Wnt Family Member 4	Protein Coding	48	GC01M022190	2.28
1393	LHCGR	Luteinizing Hormone/Choriogonadotropin Receptor	Protein Coding	48	GC02M048647	2.28
1394	SLCO1B1	Solute Carrier Organic Anion Transporter Family Member 1B1	Protein Coding	48	GC12P021132	2.28
1395	PDE6A	Phosphodiesterase 6A	Protein Coding	48	GC05M149857	2.28
1396	NR0B1	Nuclear Receptor Subfamily 0 Group B Member 1	Protein Coding	47	GC0XM030304	2.28
1397	PRODH	Proline Dehydrogenase 1	Protein Coding	47	GC22M018912	2.28
1398	PRDM1	PR/SET Domain 1	Protein Coding	47	GC06P105993	2.28
1399	POLG	DNA Polymerase Gamma, Catalytic Subunit	Protein Coding	47	GC15M089316	2.28
1400	TBX5	T-Box Transcription Factor 5	Protein Coding	47	GC12M114353	2.28
1401	MYH14	Myosin Heavy Chain 14	Protein Coding	47	GC19P050192	2.28
1402	DSC2	Desmocollin 2	Protein Coding	47	GC18M031058	2.28
1403	NEK9	NIMA Related Kinase 9	Protein Coding	47	GC14M075079	2.28
1404	CRYAB	Crystallin Alpha B	Protein Coding	47	GC11M111908	2.28
1405	HPD	4-Hydroxyphenylpyruvate Dioxygenase	Protein Coding	47	GC12M121839	2.28
1406	CFB	Complement Factor B	Protein Coding	47	GC06P031945	2.28
1407	NPHS1	NPHS1 Adhesion Molecule, Nephrin	Protein Coding	47	GC19M035825	2.28
1408	CD27	CD27 Molecule	Protein Coding	47	GC12P006608	2.28
1409	ADRA2C	Adrenoceptor Alpha 2C	Protein Coding	47	GC04P003766	2.28
1410	CAMK4	Calcium/Calmodulin Dependent Protein Kinase IV	Protein Coding	47	GC05P111223	2.28
1411	AMHR2	Anti-Mullerian Hormone Receptor Type 2	Protein Coding	47	GC12P053423	2.28
1412	APTX	Aprataxin	Protein Coding	47	GC09M032886	2.28
1413	ACADVL	Acyl-CoA Dehydrogenase Very Long Chain	Protein Coding	47	GC17P007219	2.28
1414	EPS15	Epidermal Growth Factor Receptor Pathway Substrate 15	Protein Coding	47	GC01M051354	2.28
1415	KCND3	Potassium Voltage-Gated Channel Subfamily D Member 3	Protein Coding	47	GC01M111770	2.28
1416	TPM3	Tropomyosin 3	Protein Coding	47	GC01M154127	2.28
1417	TNNC1	Troponin C1, Slow Skeletal And Cardiac Type	Protein Coding	47	GC03M052452	2.28
1418	ITGB6	Integrin Subunit Beta 6	Protein Coding	47	GC02M160099	2.28
1419	RASGRP1	RAS Guanyl Releasing Protein 1	Protein Coding	47	GC15M038488	2.28
1420	SNRPN	Small Nuclear Ribonucleoprotein Polypeptide N	Protein Coding	46	GC15P024823	2.28
1421	PKP2	Plakophilin 2	Protein Coding	46	GC12M032790	2.28
1422	CFL2	Cofilin 2	Protein Coding	46	GC14M034706	2.28
1423	DLL1	Delta Like Canonical Notch Ligand 1	Protein Coding	46	GC06M170282	2.28
1424	CD38	CD38 Molecule	Protein Coding	46	GC04P015779	2.28
1425	AIRE	Autoimmune Regulator	Protein Coding	46	GC21P044285	2.28
1426	ATP2A3	ATPase Sarcoplasmic/Endoplasmic Reticulum Ca2+ Transporting 3	Protein Coding	46	GC17M003923	2.28
1427	TNNI2	Troponin I2, Fast Skeletal Type	Protein Coding	46	GC11P001839	2.28
1428	IL12RB1	Interleukin 12 Receptor Subunit Beta 1	Protein Coding	46	GC19M018030	2.28
1429	NLRP1	NLR Family Pyrin Domain Containing 1	Protein Coding	45	GC17M005499	2.28
1430	SCN2B	Sodium Voltage-Gated Channel Beta Subunit 2	Protein Coding	45	GC11M118163	2.28
1431	THY1	Thy-1 Cell Surface Antigen	Protein Coding	45	GC11M119417	2.28
1432	SNRPB	Small Nuclear Ribonucleoprotein Polypeptides B And B1	Protein Coding	45	GC20M002461	2.28
1433	IRF4	Interferon Regulatory Factor 4	Protein Coding	45	GC06P000391	2.28
1434	SLC25A5	Solute Carrier Family 25 Member 5	Protein Coding	45	GC0XP119468	2.28
1435	PADI4	Peptidyl Arginine Deiminase 4	Protein Coding	45	GC01P017308	2.28
1436	PYGB	Glycogen Phosphorylase B	Protein Coding	45	GC20P025248	2.28
1437	PSMD4	Proteasome 26S Subunit, Non-ATPase 4	Protein Coding	45	GC01P151227	2.28
1438	CASQ2	Calsequestrin 2	Protein Coding	45	GC01M115700	2.28
1439	CLPP	Caseinolytic Mitochondrial Matrix Peptidase Proteolytic Subunit	Protein Coding	45	GC19P006381	2.28
1440	MYBPC1	Myosin Binding Protein C1	Protein Coding	45	GC12P101568	2.28
1441	NFS1	NFS1 Cysteine Desulfurase	Protein Coding	45	GC20M035668	2.28
1442	EIF2B4	Eukaryotic Translation Initiation Factor 2B Subunit Delta	Protein Coding	45	GC02M027364	2.28
1443	CS	Citrate Synthase	Protein Coding	45	GC12M056271	2.28
1444	MYL4	Myosin Light Chain 4	Protein Coding	45	GC17P047189	2.28
1445	FSHB	Follicle Stimulating Hormone Subunit Beta	Protein Coding	45	GC11P030210	2.28
1446	C1QB	Complement C1q B Chain	Protein Coding	45	GC01P022652	2.28
1447	AMH	Anti-Mullerian Hormone	Protein Coding	45	GC19P002251	2.28
1448	AQP4	Aquaporin 4	Protein Coding	45	GC18M026852	2.28
1449	TNFRSF13C	TNF Receptor Superfamily Member 13C	Protein Coding	45	GC22M044570	2.28
1450	TNFRSF17	TNF Receptor Superfamily Member 17	Protein Coding	45	GC16P011965	2.28
1451	TPM2	Tropomyosin 2	Protein Coding	45	GC09M035672	2.28
1452	XPNPEP2	X-Prolyl Aminopeptidase 2	Protein Coding	45	GC0XP129738	2.28
1453	INHA	Inhibin Subunit Alpha	Protein Coding	45	GC02P219569	2.28
1454	PGRMC1	Progesterone Receptor Membrane Component 1	Protein Coding	45	GC0XP119236	2.28
1455	CLCN1	Chloride Voltage-Gated Channel 1	Protein Coding	45	GC07P143316	2.28
1456	IL21	Interleukin 21	Protein Coding	44	GC04M122612	2.28
1457	KCNJ12	Potassium Inwardly Rectifying Channel Subfamily J Member 12	Protein Coding	44	GC17P026157	2.28
1458	IFI16	Interferon Gamma Inducible Protein 16	Protein Coding	44	GC01P158969	2.28
1459	PPIF	Peptidylprolyl Isomerase F	Protein Coding	44	GC10P083194	2.28
1460	SLC12A4	Solute Carrier Family 12 Member 4	Protein Coding	44	GC16M067944	2.28
1461	SSB	Small RNA Binding Exonuclease Protection Factor La	Protein Coding	44	GC02P169791	2.28
1462	EIF2B5	Eukaryotic Translation Initiation Factor 2B Subunit Epsilon	Protein Coding	44	GC03P184135	2.28
1463	DIAPH2	Diaphanous Related Formin 2	Protein Coding	44	GC0XP096684	2.28
1464	SGCG	Sarcoglycan Gamma	Protein Coding	44	GC13P023160	2.28
1465	GPD1L	Glycerol-3-Phosphate Dehydrogenase 1 Like	Protein Coding	44	GC03P032123	2.28
1466	DNASE1L3	Deoxyribonuclease 1 Like 3	Protein Coding	44	GC03M058192	2.28
1467	BRSK1	BR Serine/Threonine Kinase 1	Protein Coding	44	GC19P055315	2.28
1468	AMPH	Amphiphysin	Protein Coding	44	GC07M038638	2.28
1469	ANXA6	Annexin A6	Protein Coding	44	GC05M151077	2.28
1470	KIF2C	Kinesin Family Member 2C	Protein Coding	44	GC01P044739	2.28
1471	LGI1	Leucine Rich Glioma Inactivated 1	Protein Coding	44	GC10P093757	2.28
1472	LAMA2	Laminin Subunit Alpha 2	Protein Coding	44	GC06P128863	2.28
1473	HLA-DMB	Major Histocompatibility Complex, Class II, DM Beta	Protein Coding	43	GC06M032934	2.28
1474	CREM	CAMP Responsive Element Modulator	Protein Coding	43	GC10P035126	2.28
1475	IL21R	Interleukin 21 Receptor	Protein Coding	43	GC16P027413	2.28
1476	PLEC	Plectin	Protein Coding	43	GC08M143916	2.28
1477	SNRPE	Small Nuclear Ribonucleoprotein Polypeptide E	Protein Coding	43	GC01P203863	2.28
1478	PEX3	Peroxisomal Biogenesis Factor 3	Protein Coding	43	GC06P143450	2.28
1479	PEX5	Peroxisomal Biogenesis Factor 5	Protein Coding	43	GC12P007889	2.28
1480	RASGRP3	RAS Guanyl Releasing Protein 3	Protein Coding	43	GC02P033436	2.28
1481	JAG2	Jagged Canonical Notch Ligand 2	Protein Coding	43	GC14M105140	2.28
1482	SLC27A1	Solute Carrier Family 27 Member 1	Protein Coding	43	GC19P022232	2.28
1483	SLC27A6	Solute Carrier Family 27 Member 6	Protein Coding	43	GC05P128538	2.28
1484	SYCP3	Synaptonemal Complex Protein 3	Protein Coding	43	GC12M101728	2.28
1485	GSTZ1	Glutathione S-Transferase Zeta 1	Protein Coding	43	GC14P077320	2.28
1486	HEY1	Hes Related Family BHLH Transcription Factor With YRPW Motif 1	Protein Coding	43	GC08M079764	2.28
1487	MOCOS	Molybdenum Cofactor Sulfurase	Protein Coding	43	GC18P036187	2.28
1488	NEK8	NIMA Related Kinase 8	Protein Coding	43	GC17P028725	2.28
1489	COCH	Cochlin	Protein Coding	43	GC14P030874	2.28
1490	HAND2	Heart And Neural Crest Derivatives Expressed 2	Protein Coding	43	GC04M173524	2.28
1491	CHKA	Choline Kinase Alpha	Protein Coding	43	GC11M068052	2.28
1492	SARDH	Sarcosine Dehydrogenase	Protein Coding	43	GC09M133663	2.28
1493	SGCA	Sarcoglycan Alpha	Protein Coding	43	GC17P050164	2.28
1494	GNRH1	Gonadotropin Releasing Hormone 1	Protein Coding	43	GC08M025419	2.28
1495	CEP290	Centrosomal Protein 290	Protein Coding	43	GC12M088049	2.28
1496	MUS81	MUS81 Structure-Specific Endonuclease Subunit	Protein Coding	43	GC11P065878	2.28
1497	DTNA	Dystrobrevin Alpha	Protein Coding	43	GC18P034493	2.28
1498	NUP107	Nucleoporin 107	Protein Coding	43	GC12P068686	2.28
1499	ALG6	ALG6 Alpha-1,3-Glucosyltransferase	Protein Coding	43	GC01P063367	2.28
1500	AFF2	AF4/FMR2 Family Member 2	Protein Coding	43	GC0XP148500	2.28
1501	EYA4	EYA Transcriptional Coactivator And Phosphatase 4	Protein Coding	43	GC06P133240	2.28
1502	C8A	Complement C8 Alpha Chain	Protein Coding	43	GC01P056854	2.28
1503	LTK	Leukocyte Receptor Tyrosine Kinase	Protein Coding	43	GC15M041503	2.28
1504	CA3	Carbonic Anhydrase 3	Protein Coding	43	GC08P085373	2.28
1505	MAN2A1	Mannosidase Alpha Class 2A Member 1	Protein Coding	43	GC05P109689	2.28
1506	CACNB1	Calcium Voltage-Gated Channel Auxiliary Subunit Beta 1	Protein Coding	43	GC17M039173	2.28
1507	CACNG1	Calcium Voltage-Gated Channel Auxiliary Subunit Gamma 1	Protein Coding	43	GC17P067044	2.28
1508	CD5	CD5 Molecule	Protein Coding	43	GC11P061115	2.28
1509	TPM4	Tropomyosin 4	Protein Coding	43	GC19P022200	2.28
1510	TRIM21	Tripartite Motif Containing 21	Protein Coding	43	GC11M004384	2.28
1511	LGR6	Leucine Rich Repeat Containing G Protein-Coupled Receptor 6	Protein Coding	43	GC01P202193	2.28
1512	SLC4A5	Solute Carrier Family 4 Member 5	Protein Coding	43	GC02M074217	2.28
1513	ZP3	Zona Pellucida Glycoprotein 3	Protein Coding	43	GC07P076398	2.28
1514	INHBB	Inhibin Subunit Beta B	Protein Coding	43	GC02P120347	2.28
1515	HLA-DOB	Major Histocompatibility Complex, Class II, DO Beta	Protein Coding	42	GC06M032814	2.28
1516	MYPN	Myopalladin	Protein Coding	42	GC10P068106	2.28
1517	PDE6H	Phosphodiesterase 6H	Protein Coding	42	GC12P014983	2.28
1518	STAG3	Stromal Antigen 3	Protein Coding	42	GC07P100177	2.28
1519	MSH5	MutS Homolog 5	Protein Coding	42	GC06P033420	2.28
1520	MX1	MX Dynamin Like GTPase 1	Protein Coding	42	GC21P041420	2.28
1521	RPLP0	Ribosomal Protein Lateral Stalk Subunit P0	Protein Coding	42	GC12M120196	2.28
1522	RPGR	Retinitis Pigmentosa GTPase Regulator	Protein Coding	42	GC0XM038269	2.28
1523	RPL7	Ribosomal Protein L7	Protein Coding	42	GC08M073290	2.28
1524	NUP93	Nucleoporin 93	Protein Coding	42	GC16P056731	2.28
1525	DLL3	Delta Like Canonical Notch Ligand 3	Protein Coding	42	GC19P039498	2.28
1526	CD72	CD72 Molecule	Protein Coding	42	GC09M035610	2.28
1527	BBS2	Bardet-Biedl Syndrome 2	Protein Coding	42	GC16M056467	2.28
1528	BMP15	Bone Morphogenetic Protein 15	Protein Coding	42	GC0XP050910	2.28
1529	KIF3A	Kinesin Family Member 3A	Protein Coding	42	GC05M132689	2.28
1530	ZBTB17	Zinc Finger And BTB Domain Containing 17	Protein Coding	42	GC01M015943	2.28
1531	GRP	Gastrin Releasing Peptide	Protein Coding	42	GC18P059220	2.28
1532	HLA-DMA	Major Histocompatibility Complex, Class II, DM Alpha	Protein Coding	41	GC06M032950	2.28
1533	SLC5A11	Solute Carrier Family 5 Member 11	Protein Coding	41	GC16P024859	2.28
1534	PITX3	Paired Like Homeodomain 3	Protein Coding	41	GC10M102230	2.28
1535	PPCS	Phosphopantothenoylcysteine Synthetase	Protein Coding	41	GC01P042456	2.28
1536	SIGIRR	Single Ig And TIR Domain Containing	Protein Coding	41	GC11M000456	2.28
1537	SLAMF1	Signaling Lymphocytic Activation Molecule Family Member 1	Protein Coding	41	GC01M160608	2.28
1538	SLAMF6	SLAM Family Member 6	Protein Coding	41	GC01M160454	2.28
1539	TMEM43	Transmembrane Protein 43	Protein Coding	41	GC03P014124	2.28
1540	SSRP1	Structure Specific Recognition Protein 1	Protein Coding	41	GC11M059784	2.28
1541	CRYGC	Crystallin Gamma C	Protein Coding	41	GC02M208128	2.28
1542	CPEB1	Cytoplasmic Polyadenylation Element Binding Protein 1	Protein Coding	41	GC15M082543	2.28
1543	DDX4	DEAD-Box Helicase 4	Protein Coding	41	GC05P055738	2.28
1544	DMRT1	Doublesex And Mab-3 Related Transcription Factor 1	Protein Coding	41	GC09P000831	2.28
1545	MYOT	Myotilin	Protein Coding	41	GC05P137867	2.28
1546	OBSCN	Obscurin, Cytoskeletal Calmodulin And Titin-Interacting RhoGEF	Protein Coding	41	GC01P228208	2.28
1547	RRAGC	Ras Related GTP Binding C	Protein Coding	41	GC01M038843	2.28
1548	MOCS1	Molybdenum Cofactor Synthesis 1	Protein Coding	41	GC06M039899	2.28
1549	CD93	CD93 Molecule	Protein Coding	41	GC20M023079	2.28
1550	CD276	CD276 Molecule	Protein Coding	41	GC15P073683	2.28
1551	MCM8	Minichromosome Maintenance 8 Homologous Recombination Repair Factor	Protein Coding	41	GC20P005960	2.28
1552	BBS10	Bardet-Biedl Syndrome 10	Protein Coding	41	GC12M076344	2.28
1553	CACNG5	Calcium Voltage-Gated Channel Auxiliary Subunit Gamma 5	Protein Coding	41	GC17P066835	2.28
1554	FCN3	Ficolin 3	Protein Coding	41	GC01M027379	2.28
1555	TNNI1	Troponin I1, Slow Skeletal Type	Protein Coding	41	GC01M201404	2.28
1556	TNNI3K	TNNI3 Interacting Kinase	Protein Coding	41	GC01P074235	2.28
1557	TRDN	Triadin	Protein Coding	41	GC06M123198	2.28
1558	LIMS2	LIM Zinc Finger Domain Containing 2	Protein Coding	41	GC02M127638	2.28
1559	XK	X-Linked Kx Blood Group	Protein Coding	41	GC0XP037685	2.28
1560	FKRP	Fukutin Related Protein	Protein Coding	41	GC19P046746	2.28
1561	KCNIP2	Potassium Voltage-Gated Channel Interacting Protein 2	Protein Coding	41	GC10M101825	2.28
1562	LMO7	LIM Domain 7	Protein Coding	41	GC13P075620	2.28
1563	HLA-DRB5	Major Histocompatibility Complex, Class II, DR Beta 5	Protein Coding	40	GC06M032530	2.28
1564	SNRPD1	Small Nuclear Ribonucleoprotein D1 Polypeptide	Protein Coding	40	GC18P021612	2.28
1565	SLC25A17	Solute Carrier Family 25 Member 17	Protein Coding	40	GC22M044563	2.28
1566	HSPA14	Heat Shock Protein Family A (Hsp70) Member 14	Protein Coding	40	GC10P014790	2.28
1567	HSPB7	Heat Shock Protein Family B (Small) Member 7	Protein Coding	40	GC01M016014	2.28
1568	SP2	Sp2 Transcription Factor	Protein Coding	40	GC17P047896	2.28
1569	SLC15A4	Solute Carrier Family 15 Member 4	Protein Coding	40	GC12M128793	2.28
1570	PAEP	Progestagen Associated Endometrial Protein	Protein Coding	40	GC09P135561	2.28
1571	PARG	Poly(ADP-Ribose) Glycohydrolase	Protein Coding	40	GC10M049818	2.28
1572	CLEC1A	C-Type Lectin Domain Family 1 Member A	Protein Coding	40	GC12M013367	2.28
1573	GZMM	Granzyme M	Protein Coding	40	GC19P000544	2.28
1574	HLTF	Helicase Like Transcription Factor	Protein Coding	40	GC03M149030	2.28
1575	MKKS	McKusick-Kaufman Syndrome	Protein Coding	40	GC20M010403	2.28
1576	DAZL	Deleted In Azoospermia Like	Protein Coding	40	GC03M016586	2.28
1577	HEYL	Hes Related Family BHLH Transcription Factor With YRPW Motif Like	Protein Coding	40	GC01M039623	2.28
1578	HFM1	Helicase For Meiosis 1	Protein Coding	40	GC01M091260	2.28
1579	MYBPC2	Myosin Binding Protein C2	Protein Coding	40	GC19P050432	2.28
1580	GNLY	Granulysin	Protein Coding	40	GC02P085685	2.28
1581	DOLK	Dolichol Kinase	Protein Coding	40	GC09M128945	2.28
1582	DNAJC19	DnaJ Heat Shock Protein Family (Hsp40) Member C19	Protein Coding	40	GC03M180983	2.28
1583	NIT2	Nitrilase Family Member 2	Protein Coding	40	GC03P100334	2.28
1584	CD180	CD180 Molecule	Protein Coding	40	GC05M067181	2.28
1585	GDF9	Growth Differentiation Factor 9	Protein Coding	40	GC05M132861	2.28
1586	FOXL2	Forkhead Box L2	Protein Coding	40	GC03M138944	2.28
1587	BAZ1A	Bromodomain Adjacent To Zinc Finger Domain 1A	Protein Coding	40	GC14M034752	2.28
1588	LY9	Lymphocyte Antigen 9	Protein Coding	40	GC01P160796	2.28
1589	FKBP1B	FKBP Prolyl Isomerase 1B	Protein Coding	40	GC02P024049	2.28
1590	ZP2	Zona Pellucida Glycoprotein 2	Protein Coding	40	GC16M021198	2.28
1591	PSMC3IP	PSMC3 Interacting Protein	Protein Coding	40	GC17M042572	2.28
1592	JPH2	Junctophilin 2	Protein Coding	40	GC20M044111	2.28
1593	REC8	REC8 Meiotic Recombination Protein	Protein Coding	39	GC14P024171	2.28
1594	IFT80	Intraflagellar Transport 80	Protein Coding	39	GC03M160256	2.28
1595	SRRT	Serrate, RNA Effector Molecule	Protein Coding	39	GC07P100875	2.28
1596	SNRNP70	Small Nuclear Ribonucleoprotein U1 Subunit 70	Protein Coding	39	GC19P049085	2.28
1597	IFIT3	Interferon Induced Protein With Tetratricopeptide Repeats 3	Protein Coding	39	GC10P089327	2.28
1598	HEY2	Hes Related Family BHLH Transcription Factor With YRPW Motif 2	Protein Coding	39	GC06P125730	2.28
1599	MSH4	MutS Homolog 4	Protein Coding	39	GC01P075796	2.28
1600	GPR3	G Protein-Coupled Receptor 3	Protein Coding	39	GC01P027393	2.28
1601	MYOM1	Myomesin 1	Protein Coding	39	GC18M003066	2.28
1602	MYOZ2	Myozenin 2	Protein Coding	39	GC04P119135	2.28
1603	OBSL1	Obscurin Like Cytoskeletal Adaptor 1	Protein Coding	39	GC02M219550	2.28
1604	GATAD1	GATA Zinc Finger Domain Containing 1	Protein Coding	39	GC07P092447	2.28
1605	BBS1	Bardet-Biedl Syndrome 1	Protein Coding	39	GC11P066499	2.28
1606	BBS5	Bardet-Biedl Syndrome 5	Protein Coding	39	GC02P169480	2.28
1607	BBS7	Bardet-Biedl Syndrome 7	Protein Coding	39	GC04M121824	2.28
1608	BTNL2	Butyrophilin Like 2	Protein Coding	39	GC06M032393	2.28
1609	CACNG8	Calcium Voltage-Gated Channel Auxiliary Subunit Gamma 8	Protein Coding	39	GC19P053963	2.28
1610	ARID3A	AT-Rich Interaction Domain 3A	Protein Coding	39	GC19P000926	2.28
1611	ARL13B	ADP Ribosylation Factor Like GTPase 13B	Protein Coding	39	GC03P093980	2.28
1612	CALR3	Calreticulin 3	Protein Coding	39	GC19M016450	2.28
1613	TIPIN	TIMELESS Interacting Protein	Protein Coding	39	GC15M066336	2.28
1614	TNNC2	Troponin C2, Fast Skeletal Type	Protein Coding	39	GC20M045823	2.28
1615	TPRKB	TP53RK Binding Protein	Protein Coding	39	GC02M073730	2.28
1616	SMARCA1	SWI/SNF Related, Matrix Associated, Actin Dependent Regulator Of Chromatin, Subfamily A, Member 1	Protein Coding	39	GC0XM129447	2.28
1617	CENPB	Centromere Protein B	Protein Coding	39	GC20M003783	2.28
1618	DPYSL5	Dihydropyrimidinase Like 5	Protein Coding	38	GC02P026847	2.28
1619	SPO11	SPO11 Initiator Of Meiotic Double Stranded Breaks	Protein Coding	38	GC20P057329	2.28
1620	SNRPB2	Small Nuclear Ribonucleoprotein Polypeptide B2	Protein Coding	38	GC20P016730	2.28
1621	SHOX	Short Stature Homeobox	Protein Coding	38	GC0XP000624	2.28
1622	SYCE1	Synaptonemal Complex Central Element Protein 1	Protein Coding	38	GC10M133553	2.28
1623	NUP205	Nucleoporin 205	Protein Coding	38	GC07P135557	2.28
1624	GIMAP5	GTPase, IMAP Family Member 5	Protein Coding	38	GC07P150722	2.28
1625	FHOD3	Formin Homology 2 Domain Containing 3	Protein Coding	38	GC18P036297	2.28
1626	ALYREF	Aly/REF Export Factor	Protein Coding	38	GC17M081887	2.28
1627	PDLIM3	PDZ And LIM Domain 3	Protein Coding	38	GC04M185500	2.28
1628	HLA-DQA2	Major Histocompatibility Complex, Class II, DQ Alpha 2	Protein Coding	37	GC06P032741	2.28
1629	NLRP5	NLR Family Pyrin Domain Containing 5	Protein Coding	37	GC19P056000	2.28
1630	NRAP	Nebulin Related Anchoring Protein	Protein Coding	37	GC10M113588	2.28
1631	PEX11A	Peroxisomal Biogenesis Factor 11 Alpha	Protein Coding	37	GC15M089677	2.28
1632	PNMA2	PNMA Family Member 2	Protein Coding	37	GC08M026504	2.28
1633	SNRPD3	Small Nuclear Ribonucleoprotein D3 Polypeptide	Protein Coding	37	GC22P024555	2.28
1634	ITGB1BP2	Integrin Subunit Beta 1 Binding Protein 2	Protein Coding	37	GC0XP071302	2.28
1635	DACH2	Dachshund Family Transcription Factor 2	Protein Coding	37	GC0XP086148	2.28
1636	EIF4ENIF1	Eukaryotic Translation Initiation Factor 4E Nuclear Import Factor 1	Protein Coding	37	GC22M031436	2.28
1637	MRAP	Melanocortin 2 Receptor Accessory Protein	Protein Coding	37	GC21P032291	2.28
1638	DHX40	DEAH-Box Helicase 40	Protein Coding	37	GC17P059565	2.28
1639	HOPX	HOP Homeobox	Protein Coding	37	GC04M056647	2.28
1640	MYOZ1	Myozenin 1	Protein Coding	37	GC10M073631	2.28
1641	FOXJ1	Forkhead Box J1	Protein Coding	37	GC17M076136	2.28
1642	ADAMTS19	ADAM Metallopeptidase With Thrombospondin Type 1 Motif 19	Protein Coding	37	GC05P129460	2.28
1643	BLOC1S1	Biogenesis Of Lysosomal Organelles Complex 1 Subunit 1	Protein Coding	37	GC12P055718	2.28
1644	FIGLA	Folliculogenesis Specific BHLH Transcription Factor	Protein Coding	37	GC02M070741	2.28
1645	FCRL3	Fc Receptor Like 3	Protein Coding	37	GC01M157674	2.28
1646	ALPK3	Alpha Kinase 3	Protein Coding	37	GC15P084816	2.28
1647	ANKRD2	Ankyrin Repeat Domain 2	Protein Coding	37	GC10P097572	2.28
1648	TIMD4	T Cell Immunoglobulin And Mucin Domain Containing 4	Protein Coding	37	GC05M156919	2.28
1649	LHX8	LIM Homeobox 8	Protein Coding	37	GC01P075128	2.28
1650	L3MBTL3	L3MBTL Histone Methyl-Lysine Binding Protein 3	Protein Coding	37	GC06P129978	2.28
1651	LCMT2	Leucine Carboxyl Methyltransferase 2	Protein Coding	37	GC15M043323	2.28
1652	TRIM68	Tripartite Motif Containing 68	Protein Coding	37	GC11M004577	2.28
1653	NANOS3	Nanos C2HC-Type Zinc Finger 3	Protein Coding	36	GC19P013862	2.28
1654	SPON1	Spondin 1	Protein Coding	36	GC11P013940	2.28
1655	POF1B	POF1B Actin Binding Protein	Protein Coding	36	GC0XM085277	2.28
1656	PLEKHM2	Pleckstrin Homology And RUN Domain Containing M2	Protein Coding	36	GC01P015691	2.28
1657	SYCP1	Synaptonemal Complex Protein 1	Protein Coding	36	GC01P114854	2.28
1658	CROCC	Ciliary Rootlet Coiled-Coil, Rootletin	Protein Coding	36	GC01P016765	2.28
1659	HRC	Histidine Rich Calcium Binding Protein	Protein Coding	36	GC19M049151	2.28
1660	DNAH10	Dynein Axonemal Heavy Chain 10	Protein Coding	36	GC12P123762	2.28
1661	CFHR4	Complement Factor H Related 4	Protein Coding	36	GC01P196857	2.28
1662	MTPN	Myotrophin	Protein Coding	36	GC07M135926	2.28
1663	MFSD10	Major Facilitator Superfamily Domain Containing 10	Protein Coding	36	GC04M002903	2.28
1664	MED18	Mediator Complex Subunit 18	Protein Coding	36	GC01P028340	2.28
1665	FAM167A	Family With Sequence Similarity 167 Member A	Protein Coding	36	GC08M011421	2.28
1666	UHRF1BP1	UHRF1 Binding Protein 1	Protein Coding	36	GC06P046025	2.28
1667	PHRF1	PHD And Ring Finger Domains 1	Protein Coding	36	GC11P000580	2.28
1668	ZRANB3	Zinc Finger RANBP2-Type Containing 3	Protein Coding	36	GC02M135136	2.28
1669	SPAG17	Sperm Associated Antigen 17	Protein Coding	35	GC01M117953	2.28
1670	STRA8	Stimulated By Retinoic Acid 8	Protein Coding	35	GC07P135231	2.28
1671	SOHLH1	Spermatogenesis And Oogenesis Specific Basic Helix-Loop-Helix 1	Protein Coding	35	GC09M135693	2.28
1672	LRRC10	Leucine Rich Repeat Containing 10	Protein Coding	35	GC12M069608	2.28
1673	MT-CO1	Mitochondrially Encoded Cytochrome C Oxidase I	Protein Coding	35	GCMTP005906	2.28
1674	MYOM3	Myomesin 3	Protein Coding	35	GC01M024056	2.28
1675	H4-16	H4 Histone 16	Protein Coding	35	GC12M014768	2.28
1676	NOBOX	NOBOX Oogenesis Homeobox	Protein Coding	35	GC07M144397	2.28
1677	FOXD4	Forkhead Box D4	Protein Coding	35	GC09M000116	2.28
1678	EPSTI1	Epithelial Stromal Interaction 1	Protein Coding	35	GC13M042886	2.28
1679	PTRHD1	Peptidyl-TRNA Hydrolase Domain Containing 1	Protein Coding	35	GC02M024790	2.28
1680	PDCL2	Phosducin Like 2	Protein Coding	34	GC04M055556	2.28
1681	CEP85L	Centrosomal Protein 85 Like	Protein Coding	34	GC06M118460	2.28
1682	NUDCD1	NudC Domain Containing 1	Protein Coding	34	GC08M109240	2.28
1683	SMDT1	Single-Pass Membrane Protein With Aspartate Rich Tail 1	Protein Coding	34	GC22P042079	2.28
1684	SRFBP1	Serum Response Factor Binding Protein 1	Protein Coding	33	GC05P121961	2.28
1685	NXF5	Nuclear RNA Export Factor 5	Protein Coding	33	GC0XM101832	2.28
1686	SOHLH2	Spermatogenesis And Oogenesis Specific Basic Helix-Loop-Helix 2	Protein Coding	32	GC13M036169	2.28
1687	H2BC21	H2B Clustered Histone 21	Protein Coding	32	GC01M149925	2.28
1688	EMC10	ER Membrane Protein Complex Subunit 10	Protein Coding	32	GC19P050476	2.28
1689	ANKRD23	Ankyrin Repeat Domain 23	Protein Coding	32	GC02M096826	2.28
1690	HLA-DRB4	Major Histocompatibility Complex, Class II, DR Beta 4	Protein Coding	31	GC06Mo03851	2.28
1691	NPB	Neuropeptide B	Protein Coding	31	GC17P081900	2.28
1692	CXorf21	Chromosome X Open Reading Frame 21	Protein Coding	31	GC0XM030558	2.28
1693	RO60	Ro60, Y RNA Binding Protein	Protein Coding	31	GC01P193059	2.28
1694	MEIG1	Meiosis/Spermiogenesis Associated 1	Protein Coding	31	GC10P014954	2.28
1695	C1orf210	Chromosome 1 Open Reading Frame 210	Protein Coding	31	GC01M043281	2.28
1696	LRRC43	Leucine Rich Repeat Containing 43	Protein Coding	31	GC12P122167	2.28
1697	RAD21L1	RAD21 Cohesin Complex Component Like 1	Protein Coding	30	GC20P001226	2.28
1698	TMEM150B	Transmembrane Protein 150B	Protein Coding	29	GC19M055308	2.28
1699	H3C14	H3 Clustered Histone 14	Protein Coding	29	GC01M149917	2.28
1700	CEP295	Centrosomal Protein 295	Protein Coding	29	GC11P093661	2.28
1701	HLA-DRB3	Major Histocompatibility Complex, Class II, DR Beta 3	Protein Coding	28	GC06Mn03715	2.28
1702	ABRAXAS2	Abraxas 2, BRISC Complex Subunit	Protein Coding	28	GC10P124802	2.28
1703	CAVIN4	Caveolae Associated Protein 4	Protein Coding	27	GC09P100576	2.28
1704	RMRP	RNA Component Of Mitochondrial RNA Processing Endoribonuclease	RNA Gene	25	GC09M035655	2.28
1705	CFAP47	Cilia And Flagella Associated Protein 47	Protein Coding	25	GC0XP035919	2.28
1706	MIR184	MicroRNA 184	RNA Gene	23	GC15P079209	2.28
1707	MIR133B	MicroRNA 133b	RNA Gene	21	GC06P052148	2.28
1708	MIR433	MicroRNA 433	RNA Gene	21	GC14P104250	2.28
1709	MIR197	MicroRNA 197	RNA Gene	20	GC01P109549	2.28
1710	MIR615	MicroRNA 615	RNA Gene	20	GC12P054033	2.28
1711	MIR208B	MicroRNA 208b	RNA Gene	20	GC14M023417	2.28
1712	MIR324	MicroRNA 324	RNA Gene	19	GC17M007223	2.28
1713	MIR346	MicroRNA 346	RNA Gene	19	GC10M086264	2.28
1714	MIR15B	MicroRNA 15b	RNA Gene	19	GC03P160404	2.28
1715	MIR484	MicroRNA 484	RNA Gene	19	GC16P015660	2.28
1716	ATP6V1G2-DDX39B	ATP6V1G2-DDX39B Readthrough (NMD Candidate)	RNA Gene	19	GC06M032363	2.28
1717	MIR769	MicroRNA 769	RNA Gene	18	GC19P046018	2.28
1718	MIR296	MicroRNA 296	RNA Gene	18	GC20M058817	2.28
1719	MIR654	MicroRNA 654	RNA Gene	18	GC14P104477	2.28
1720	MIR381	MicroRNA 381	RNA Gene	18	GC14P104457	2.28
1721	MIR608	MicroRNA 608	RNA Gene	18	GC10P100974	2.28
1722	MIR500A	MicroRNA 500a	RNA Gene	17	GC0XP050008	2.28
1723	MIR30D	MicroRNA 30d	RNA Gene	17	GC08M134804	2.28
1724	MIR637	MicroRNA 637	RNA Gene	17	GC19M003961	2.28
1725	MIR642A	MicroRNA 642a	RNA Gene	17	GC19P045674	2.28
1726	MIR657	MicroRNA 657	RNA Gene	17	GC17M081125	2.28
1727	MIR518B	MicroRNA 518b	RNA Gene	17	GC19P054100	2.28
1728	MIR494	MicroRNA 494	RNA Gene	17	GC14P104471	2.28
1729	MIR601	MicroRNA 601	RNA Gene	17	GC09M123402	2.28
1730	HNRNPUL2-BSCL2	HNRNPUL2-BSCL2 Readthrough (NMD Candidate)	RNA Gene	17	GC11M063081	2.28
1731	MIR612	MicroRNA 612	RNA Gene	17	GC11P065619	2.28
1732	C4B_2	Complement Component 4B (Chido Blood Group), Copy 2	Protein Coding	17	GC06Po03283	2.28
1733	MIR611	MicroRNA 611	RNA Gene	16	GC11M061792	2.28
1734	TARID	TCF21 Antisense RNA Inducing Promoter Demethylation	RNA Gene	16	GC06M133502	2.28
1735	MIR198	MicroRNA 198	RNA Gene	16	GC03M120395	2.28
1736	MIR629	MicroRNA 629	RNA Gene	16	GC15M070079	2.28
1737	MIR662	MicroRNA 662	RNA Gene	16	GC16P001259	2.28
1738	MIR557	MicroRNA 557	RNA Gene	16	GC01P168375	2.28
1739	MIR583	MicroRNA 583	RNA Gene	16	GC05P096079	2.28
1740	ACTA2-AS1	ACTA2 Antisense RNA 1	RNA Gene	16	GC10P088932	2.28
1741	FAM223A	Family With Sequence Similarity 223 Member A	RNA Gene	16	GC0XP154571	2.28
1742	MIR325	MicroRNA 325	RNA Gene	14	GC0XM077005	2.28
1743	MIR622	MicroRNA 622	RNA Gene	14	GC13P090231	2.28
1744	MIR658	MicroRNA 658	RNA Gene	14	GC22M044776	2.28
1745	MIR596	MicroRNA 596	RNA Gene	14	GC08P001817	2.28
1746	MIR600	MicroRNA 600	RNA Gene	14	GC09M123111	2.28
1747	MIR602	MicroRNA 602	RNA Gene	14	GC09P137838	2.28
1748	ALMS1P1	ALMS1 Pseudogene 1	Pseudogene	14	GC02P073644	2.28
1749	WFDC21P	WAP Four-Disulfide Core Domain 21, Pseudogene	Pseudogene	13	GC17M060085	2.28
1750	MHRT	Myosin Heavy Chain Associated RNA Transcript	RNA Gene	12	GC14P025075	2.28
1751	MT-LIPCAR	Mitochondrially Encoded Long Non-Coding Cardiac Associated RNA	Uncategorized	5	GC00U936426	2.28
1752	lnc-KDM5D-4		RNA Gene	5	GC0YM020519	2.28
1753	ENSG00000266919		RNA Gene	5	GC17M030118	2.28
1754	LDLR-AS1	LDLR-AS1	RNA Gene	4	GC19U902505	2.28
1755	SLEH1	Systemic Lupus Erythematosus With Hemolytic Anemia 1	Genetic Locus	4	GC11U990621	2.28
1756	SLEN1	Systemic Lupus Erythematosus With Nephritis 1	Genetic Locus	4	GC10U990138	2.28
1757	SLEN2	Systemic Lupus Erythematosus With Nephritis 2	Genetic Locus	4	GC02U990328	2.28
1758	SLEN3	Systemic Lupus Erythematosus With Nephritis 3	Genetic Locus	4	GC11U900015	2.28
1759	LOC112806077	Sharpr-MPRA Regulatory Region 13820	Biological Region	2	GC02U904622	2.28
1760	LOC106780803	Tenascin XB Recombination Region	Biological Region	2	GC06U903564	2.28
1761	GLP1R	Glucagon Like Peptide 1 Receptor	Protein Coding	46	GC06P039048	2.28
1762	BAX	BCL2 Associated X, Apoptosis Regulator	Protein Coding	50	GC19P048954	2.27
1763	SCD	Stearoyl-CoA Desaturase	Protein Coding	49	GC10P100347	2.26
1764	VCAN	Versican	Protein Coding	48	GC05P083471	2.26
1765	HSPB1	Heat Shock Protein Family B (Small) Member 1	Protein Coding	52	GC07P076302	2.24
1766	CTSK	Cathepsin K	Protein Coding	50	GC01M150796	2.24
1767	IGF2	Insulin Like Growth Factor 2	Protein Coding	49	GC11M002130	2.22
1768	C1QTNF9	C1q And TNF Related 9	Protein Coding	35	GC13P024307	2.22
1769	APOD	Apolipoprotein D	Protein Coding	44	GC03M195568	2.22
1770	MFGE8	Milk Fat Globule-EGF Factor 8 Protein	Protein Coding	45	GC15M088898	2.21
1771	ID3	Inhibitor Of DNA Binding 3, HLH Protein	Protein Coding	43	GC01M023557	2.2
1772	MIR19A	MicroRNA 19a	RNA Gene	19	GC13P091426	2.2
1773	PNPLA3	Patatin Like Phospholipase Domain Containing 3	Protein Coding	42	GC22P043923	2.18
1774	HSPB2	Heat Shock Protein Family B (Small) Member 2	Protein Coding	42	GC11P111913	2.18
1775	TLR1	Toll Like Receptor 1	Protein Coding	49	GC04M038797	2.17
1776	F2RL1	F2R Like Trypsin Receptor 1	Protein Coding	47	GC05P076818	2.17
1777	FMN2	Formin 2	Protein Coding	41	GC01P240014	2.17
1778	CPE	Carboxypeptidase E	Protein Coding	46	GC04P165361	2.15
1779	HBEGF	Heparin Binding EGF Like Growth Factor	Protein Coding	44	GC05M140332	2.15
1780	RXRA	Retinoid X Receptor Alpha	Protein Coding	51	GC09P134317	2.15
1781	DKK1	Dickkopf WNT Signaling Pathway Inhibitor 1	Protein Coding	47	GC10P052314	2.15
1782	FMO3	Flavin Containing Dimethylaniline Monoxygenase 3	Protein Coding	48	GC01P171090	2.14
1783	GPER1	G Protein-Coupled Estrogen Receptor 1	Protein Coding	39	GC07P001143	2.14
1784	THPO	Thrombopoietin	Protein Coding	44	GC03M184371	2.14
1785	HPX	Hemopexin	Protein Coding	39	GC11M006435	2.13
1786	CSN1S1	Casein Alpha S1	Protein Coding	34	GC04P069932	2.13
1787	FABP5	Fatty Acid Binding Protein 5	Protein Coding	43	GC08P081282	2.12
1788	MTNR1B	Melatonin Receptor 1B	Protein Coding	47	GC11P092969	2.11
1789	MARS1	Methionyl-TRNA Synthetase 1	Protein Coding	36	GC12P057476	2.11
1790	IL12B	Interleukin 12B	Protein Coding	45	GC05M159314	2.11
1791	LDB2	LIM Domain Binding 2	Protein Coding	40	GC04M016445	2.11
1792	PCSK5	Proprotein Convertase Subtilisin/Kexin Type 5	Protein Coding	41	GC09P075890	2.1
1793	PROS1	Protein S	Protein Coding	48	GC03M093873	2.09
1794	CTSB	Cathepsin B	Protein Coding	52	GC08M011842	2.09
1795	NOD2	Nucleotide Binding Oligomerization Domain Containing 2	Protein Coding	49	GC16P050693	2.09
1796	IL9	Interleukin 9	Protein Coding	45	GC05M135891	2.09
1797	MDM2	MDM2 Proto-Oncogene	Protein Coding	54	GC12P068808	2.08
1798	PTAFR	Platelet Activating Factor Receptor	Protein Coding	44	GC01M028147	2.08
1799	PRDX1	Peroxiredoxin 1	Protein Coding	51	GC01M045511	2.08
1800	HBA1	Hemoglobin Subunit Alpha 1	Protein Coding	43	GC16P001212	2.07
1801	LTB4R2	Leukotriene B4 Receptor 2	Protein Coding	41	GC14P025025	2.07
1802	TGM2	Transglutaminase 2	Protein Coding	50	GC20M038127	2.06
1803	PTGES	Prostaglandin E Synthase	Protein Coding	42	GC09M129738	2.06
1804	MET	MET Proto-Oncogene, Receptor Tyrosine Kinase	Protein Coding	56	GC07P116672	2.05
1805	HSD11B1	Hydroxysteroid 11-Beta Dehydrogenase 1	Protein Coding	51	GC01P209686	2.05
1806	MIR92A2	MicroRNA 92a-2	RNA Gene	17	GC0XM134215	2.04
1807	NR4A2	Nuclear Receptor Subfamily 4 Group A Member 2	Protein Coding	47	GC02M156324	2.04
1808	BRAP	BRCA1 Associated Protein	Protein Coding	42	GC12M111642	2.03
1809	F13B	Coagulation Factor XIII B Chain	Protein Coding	41	GC01M197008	2.03
1810	APOBEC1	Apolipoprotein B MRNA Editing Enzyme Catalytic Subunit 1	Protein Coding	39	GC12M007649	2.03
1811	WWTR1	WW Domain Containing Transcription Regulator 1	Protein Coding	43	GC03M149517	2.02
1812	MIR19B2	MicroRNA 19b-2	RNA Gene	17	GC0XM134216	2.02
1813	MEFV	MEFV Innate Immuity Regulator, Pyrin	Protein Coding	44	GC16M003259	2.02
1814	TRAF6	TNF Receptor Associated Factor 6	Protein Coding	48	GC11M036467	2.01
1815	CMKLR1	Chemerin Chemokine-Like Receptor 1	Protein Coding	41	GC12M108288	2.01
1816	TSLP	Thymic Stromal Lymphopoietin	Protein Coding	40	GC05P111070	2.01
1817	MIR181B1	MicroRNA 181b-1	RNA Gene	20	GC01M198858	2.01
1818	PTPN1	Protein Tyrosine Phosphatase Non-Receptor Type 1	Protein Coding	52	GC20P050510	2.01
1819	TFPI2	Tissue Factor Pathway Inhibitor 2	Protein Coding	43	GC07M093885	2.01
1820	CCL15	C-C Motif Chemokine Ligand 15	Protein Coding	37	GC17M035996	2.01
1821	WNT5A	Wnt Family Member 5A	Protein Coding	51	GC03M055465	2
1822	IL19	Interleukin 19	Protein Coding	41	GC01P206770	1.99
1823	RELN	Reelin	Protein Coding	44	GC07M103471	1.99
1824	TRAF2	TNF Receptor Associated Factor 2	Protein Coding	46	GC09P136881	1.98
1825	RGS2	Regulator Of G Protein Signaling 2	Protein Coding	44	GC01P192809	1.98
1826	NCOA2	Nuclear Receptor Coactivator 2	Protein Coding	46	GC08M070109	1.98
1827	INSIG2	Insulin Induced Gene 2	Protein Coding	40	GC02P118088	1.98
1828	HMCN1	Hemicentin 1	Protein Coding	39	GC01P185734	1.98
1829	SCARB2	Scavenger Receptor Class B Member 2	Protein Coding	45	GC04M076158	1.97
1830	FMOD	Fibromodulin	Protein Coding	41	GC01M203340	1.96
1831	FPR2	Formyl Peptide Receptor 2	Protein Coding	47	GC19P051752	1.95
1832	F12	Coagulation Factor XII	Protein Coding	48	GC05M177402	1.95
1833	STK11	Serine/Threonine Kinase 11	Protein Coding	50	GC19P001177	1.95
1834	HYAL1	Hyaluronidase 1	Protein Coding	47	GC03M050299	1.95
1835	ADAMTS5	ADAM Metallopeptidase With Thrombospondin Type 1 Motif 5	Protein Coding	43	GC21M026918	1.95
1836	IL20RA	Interleukin 20 Receptor Subunit Alpha	Protein Coding	39	GC06M136999	1.95
1837	SORCS1	Sortilin Related VPS10 Domain Containing Receptor 1	Protein Coding	39	GC10M106573	1.95
1838	LECT2	Leukocyte Cell Derived Chemotaxin 2	Protein Coding	37	GC05M135922	1.95
1839	SELENOS	Selenoprotein S	Protein Coding	32	GC15M102816	1.95
1840	SFTPD	Surfactant Protein D	Protein Coding	45	GC10M079937	1.94
1841	LYVE1	Lymphatic Vessel Endothelial Hyaluronan Receptor 1	Protein Coding	43	GC11M010636	1.93
1842	ADAM10	ADAM Metallopeptidase Domain 10	Protein Coding	54	GC15M058588	1.93
1843	IGFBP2	Insulin Like Growth Factor Binding Protein 2	Protein Coding	45	GC02P216632	1.91
1844	MTHFD1L	Methylenetetrahydrofolate Dehydrogenase (NADP+ Dependent) 1 Like	Protein Coding	43	GC06P150865	1.91
1845	ANGPTL2	Angiopoietin Like 2	Protein Coding	37	GC09M127087	1.9
1846	RARA	Retinoic Acid Receptor Alpha	Protein Coding	52	GC17P040309	1.89
1847	PTGDS	Prostaglandin D2 Synthase	Protein Coding	46	GC09P136977	1.89
1848	CDKN3	Cyclin Dependent Kinase Inhibitor 3	Protein Coding	41	GC14P054398	1.88
1849	ELK1	ETS Transcription Factor ELK1	Protein Coding	45	GC0XM047635	1.88
1850	CNTN1	Contactin 1	Protein Coding	45	GC12P040692	1.87
1851	TUSC1	Tumor Suppressor Candidate 1	Protein Coding	29	GC09M025668	1.87
1852	TRAF1	TNF Receptor Associated Factor 1	Protein Coding	44	GC09M120902	1.87
1853	LGMN	Legumain	Protein Coding	44	GC14M092703	1.87
1854	GZMB	Granzyme B	Protein Coding	47	GC14M024630	1.86
1855	IL17B	Interleukin 17B	Protein Coding	43	GC05M149371	1.86
1856	NFKBIB	NFKB Inhibitor Beta	Protein Coding	42	GC19P038899	1.86
1857	MCPH1	Microcephalin 1	Protein Coding	42	GC08P006406	1.86
1858	CSF1R	Colony Stimulating Factor 1 Receptor	Protein Coding	53	GC05M150053	1.86
1859	EP300	E1A Binding Protein P300	Protein Coding	52	GC22P041091	1.86
1860	GH1	Growth Hormone 1	Protein Coding	46	GC17M063917	1.86
1861	FABP12	Fatty Acid Binding Protein 12	Protein Coding	31	GC08M081524	1.86
1862	NR1I3	Nuclear Receptor Subfamily 1 Group I Member 3	Protein Coding	45	GC01M161229	1.85
1863	IL24	Interleukin 24	Protein Coding	44	GC01P206897	1.85
1864	APCS	Amyloid P Component, Serum	Protein Coding	42	GC01P159587	1.84
1865	HLA-B	Major Histocompatibility Complex, Class I, B	Protein Coding	46	GC06M031289	1.84
1866	HSPA1A	Heat Shock Protein Family A (Hsp70) Member 1A	Protein Coding	45	GC06P033429	1.83
1867	CXCL5	C-X-C Motif Chemokine Ligand 5	Protein Coding	42	GC04M073995	1.83
1868	ACKR3	Atypical Chemokine Receptor 3	Protein Coding	42	GC02P236537	1.83
1869	LRRIQ3	Leucine Rich Repeats And IQ Motif Containing 3	Protein Coding	31	GC01M074026	1.83
1870	AIF1	Allograft Inflammatory Factor 1	Protein Coding	41	GC06P033396	1.83
1871	VEGFC	Vascular Endothelial Growth Factor C	Protein Coding	48	GC04M176683	1.82
1872	MIR212	MicroRNA 212	RNA Gene	20	GC17M002050	1.82
1873	P2RX7	Purinergic Receptor P2X 7	Protein Coding	47	GC12P122630	1.81
1874	KLF5	Kruppel Like Factor 5	Protein Coding	44	GC13P073054	1.81
1875	MIRLET7G	MicroRNA Let-7g	RNA Gene	20	GC03M052268	1.81
1876	YAP1	Yes Associated Protein 1	Protein Coding	49	GC11P102110	1.81
1877	FUT3	Fucosyltransferase 3 (Lewis Blood Group)	Protein Coding	44	GC19M005843	1.8
1878	CYP2C8	Cytochrome P450 Family 2 Subfamily C Member 8	Protein Coding	50	GC10M095038	1.78
1879	IGF2BP2	Insulin Like Growth Factor 2 MRNA Binding Protein 2	Protein Coding	44	GC03M185643	1.78
1880	PODXL	Podocalyxin Like	Protein Coding	43	GC07M131500	1.78
1881	RTN3	Reticulon 3	Protein Coding	43	GC11P063700	1.78
1882	CDKAL1	CDK5 Regulatory Subunit Associated Protein 1 Like 1	Protein Coding	39	GC06P020534	1.78
1883	MIR24-1	MicroRNA 24-1	RNA Gene	20	GC09P095086	1.78
1884	NTN1	Netrin 1	Protein Coding	46	GC17P009021	1.78
1885	TREM1	Triggering Receptor Expressed On Myeloid Cells 1	Protein Coding	43	GC06M041267	1.78
1886	CCL1	C-C Motif Chemokine Ligand 1	Protein Coding	40	GC17M034398	1.78
1887	CDC42	Cell Division Cycle 42	Protein Coding	53	GC01P022043	1.77
1888	NAT2	N-Acetyltransferase 2	Protein Coding	44	GC08P018391	1.77
1889	FGF3	Fibroblast Growth Factor 3	Protein Coding	45	GC11M069811	1.77
1890	ADH1B	Alcohol Dehydrogenase 1B (Class I), Beta Polypeptide	Protein Coding	44	GC04M099304	1.77
1891	GRK4	G Protein-Coupled Receptor Kinase 4	Protein Coding	43	GC04P002967	1.77
1892	DNM2	Dynamin 2	Protein Coding	51	GC19P010718	1.77
1893	LRIG1	Leucine Rich Repeats And Immunoglobulin Like Domains 1	Protein Coding	43	GC03M066429	1.77
1894	ZHX2	Zinc Fingers And Homeoboxes 2	Protein Coding	38	GC08P122781	1.77
1895	SLC17A4	Solute Carrier Family 17 Member 4	Protein Coding	36	GC06P025838	1.77
1896	RPL21P41	Ribosomal Protein L21 Pseudogene 41	Pseudogene	7	GC03P066638	1.77
1897	S1PR1	Sphingosine-1-Phosphate Receptor 1	Protein Coding	46	GC01P101236	1.75
1898	TXNRD1	Thioredoxin Reductase 1	Protein Coding	48	GC12P104215	1.75
1899	FGFR4	Fibroblast Growth Factor Receptor 4	Protein Coding	53	GC05P177086	1.72
1900	TNFRSF12A	TNF Receptor Superfamily Member 12A	Protein Coding	45	GC16P003018	1.72
1901	RXRG	Retinoid X Receptor Gamma	Protein Coding	43	GC01M165401	1.72
1902	GPR132	G Protein-Coupled Receptor 132	Protein Coding	41	GC14M105049	1.72
1903	MIR122	MicroRNA 122	RNA Gene	21	GC18P058451	1.72
1904	TMEM258	Transmembrane Protein 258	Protein Coding	31	GC11M061768	1.72
1905	HDAC3	Histone Deacetylase 3	Protein Coding	51	GC05M141583	1.71
1906	FEM1A	Fem-1 Homolog A	Protein Coding	37	GC19P004791	1.71
1907	PCNA	Proliferating Cell Nuclear Antigen	Protein Coding	52	GC20M005114	1.7
1908	UGT1A1	UDP Glucuronosyltransferase Family 1 Member A1	Protein Coding	50	GC02P233760	1.7
1909	ATP6AP2	ATPase H+ Transporting Accessory Protein 2	Protein Coding	45	GC0XP040582	1.7
1910	FGF19	Fibroblast Growth Factor 19	Protein Coding	45	GC11M069699	1.7
1911	TLR6	Toll Like Receptor 6	Protein Coding	45	GC04M038828	1.7
1912	GLO1	Glyoxalase I	Protein Coding	47	GC06M041312	1.7
1913	LY96	Lymphocyte Antigen 96	Protein Coding	43	GC08P073991	1.7
1914	IL1RAPL2	Interleukin 1 Receptor Accessory Protein Like 2	Protein Coding	38	GC0XP104566	1.7
1915	PPP1R3B	Protein Phosphatase 1 Regulatory Subunit 3B	Protein Coding	38	GC08M009136	1.69
1916	HBP1	HMG-Box Transcription Factor 1	Protein Coding	39	GC07P107168	1.68
1917	LINC02577	Long Intergenic Non-Protein Coding RNA 2577	RNA Gene	10	GC07P106777	1.68
1918	ENSG00000243797		RNA Gene	8	GC07M106372	1.68
1919	PRMT5P1	Protein Arginine Methyltransferase 5 Pseudogene 1	Pseudogene	6	GC04M147458	1.68
1920	lnc-PIK3CG-6		RNA Gene	5	GC07P106489	1.68
1921	ENSG00000267052		RNA Gene	5	GC07M106571	1.68
1922	piR-55948-110		RNA Gene	4	GC07M106709	1.68
1923	XIAP	X-Linked Inhibitor Of Apoptosis	Protein Coding	51	GC0XP123859	1.68
1924	RORA	RAR Related Orphan Receptor A	Protein Coding	50	GC15M060488	1.67
1925	SLC2A1	Solute Carrier Family 2 Member 1	Protein Coding	54	GC01M042925	1.67
1926	ARG1	Arginase 1	Protein Coding	51	GC06P131473	1.67
1927	PAK1	P21 (RAC1) Activated Kinase 1	Protein Coding	49	GC11M077321	1.67
1928	ADORA2A	Adenosine A2a Receptor	Protein Coding	46	GC22P024417	1.67
1929	UCP3	Uncoupling Protein 3	Protein Coding	44	GC11M074000	1.67
1930	CREB3	CAMP Responsive Element Binding Protein 3	Protein Coding	39	GC09P035722	1.67
1931	MIA3	MIA SH3 Domain ER Export Factor 3	Protein Coding	39	GC01P222618	1.67
1932	CCL23	C-C Motif Chemokine Ligand 23	Protein Coding	36	GC17M036013	1.67
1933	MIR34A	MicroRNA 34a	RNA Gene	22	GC01M009151	1.67
1934	MIR152	MicroRNA 152	RNA Gene	20	GC17M048037	1.67
1935	G6PD	Glucose-6-Phosphate Dehydrogenase	Protein Coding	52	GC0XM154531	1.65
1936	DDAH1	Dimethylarginine Dimethylaminohydrolase 1	Protein Coding	44	GC01M085318	1.65
1937	MIR217	MicroRNA 217	RNA Gene	19	GC02M055982	1.65
1938	RXRB	Retinoid X Receptor Beta	Protein Coding	48	GC06M033193	1.64
1939	ADORA2B	Adenosine A2b Receptor	Protein Coding	48	GC17P015927	1.64
1940	APEX1	Apurinic/Apyrimidinic Endodeoxyribonuclease 1	Protein Coding	47	GC14P020455	1.64
1941	EIF2S1	Eukaryotic Translation Initiation Factor 2 Subunit Alpha	Protein Coding	46	GC14P067359	1.64
1942	CYP26B1	Cytochrome P450 Family 26 Subfamily B Member 1	Protein Coding	45	GC02M072129	1.64
1943	H6PD	Hexose-6-Phosphate Dehydrogenase/Glucose 1-Dehydrogenase	Protein Coding	42	GC01P009234	1.64
1944	STC2	Stanniocalcin 2	Protein Coding	41	GC05M173314	1.64
1945	FBXO3	F-Box Protein 3	Protein Coding	39	GC11M033740	1.64
1946	GGT2	Gamma-Glutamyltransferase 2	Protein Coding	32	GC22M021207	1.64
1947	HOTAIR	HOX Transcript Antisense RNA	RNA Gene	25	GC12M053962	1.64
1948	MIR490	MicroRNA 490	RNA Gene	17	GC07P136903	1.64
1949	ADTRP	Androgen Dependent TFPI Regulating Protein	Protein Coding	32	GC06M011712	1.63
1950	TEK	TEK Receptor Tyrosine Kinase	Protein Coding	52	GC09P027109	1.63
1951	CORIN	Corin, Serine Peptidase	Protein Coding	45	GC04M047596	1.63
1952	PLA2G6	Phospholipase A2 Group VI	Protein Coding	50	GC22M045345	1.6
1953	PDGFC	Platelet Derived Growth Factor C	Protein Coding	44	GC04M156760	1.6
1954	ESM1	Endothelial Cell Specific Molecule 1	Protein Coding	40	GC05M054977	1.6
1955	MT2A	Metallothionein 2A	Protein Coding	43	GC16P056626	1.6
1956	LTBR	Lymphotoxin Beta Receptor	Protein Coding	43	GC12P006375	1.6
1957	CREG1	Cellular Repressor Of E1A Stimulated Genes 1	Protein Coding	39	GC01M167498	1.6
1958	ARMS2	Age-Related Maculopathy Susceptibility 2	Protein Coding	31	GC10P122454	1.6
1959	MIR125B1	MicroRNA 125b-1	RNA Gene	22	GC11M122100	1.6
1960	MC4R	Melanocortin 4 Receptor	Protein Coding	46	GC18M060371	1.58
1961	VIM	Vimentin	Protein Coding	51	GC10P017227	1.58
1962	CANT1	Calcium Activated Nucleotidase 1	Protein Coding	44	GC17M078992	1.58
1963	VEGFD	Vascular Endothelial Growth Factor D	Protein Coding	36	GC0XM015345	1.58
1964	CD47	CD47 Molecule	Protein Coding	45	GC03M108043	1.56
1965	QKI	QKI, KH Domain Containing RNA Binding	Protein Coding	44	GC06P163414	1.56
1966	GNA12	G Protein Subunit Alpha 12	Protein Coding	43	GC07M002728	1.56
1967	ADH1C	Alcohol Dehydrogenase 1C (Class I), Gamma Polypeptide	Protein Coding	43	GC04M099336	1.56
1968	EREG	Epiregulin	Protein Coding	43	GC04P074366	1.56
1969	LGALS3BP	Galectin 3 Binding Protein	Protein Coding	42	GC17M078971	1.56
1970	CARD8	Caspase Recruitment Domain Family Member 8	Protein Coding	40	GC19M048181	1.56
1971	DFFB	DNA Fragmentation Factor Subunit Beta	Protein Coding	44	GC01P003797	1.55
1972	STEAP2-AS1	STEAP2 Antisense RNA 1	RNA Gene	14	GC07M089882	1.54
1973	PTGER2	Prostaglandin E Receptor 2	Protein Coding	49	GC14P052314	1.52
1974	KLKB1	Kallikrein B1	Protein Coding	49	GC04P186208	1.52
1975	ATF4	Activating Transcription Factor 4	Protein Coding	48	GC22P039519	1.52
1976	ARRB2	Arrestin Beta 2	Protein Coding	45	GC17P004711	1.52
1977	PLA2G5	Phospholipase A2 Group V	Protein Coding	44	GC01P020028	1.52
1978	AIMP1	Aminoacyl TRNA Synthetase Complex Interacting Multifunctional Protein 1	Protein Coding	44	GC04P106315	1.52
1979	PPP1R12A	Protein Phosphatase 1 Regulatory Subunit 12A	Protein Coding	42	GC12M079773	1.52
1980	CACNA2D3	Calcium Voltage-Gated Channel Auxiliary Subunit Alpha2delta 3	Protein Coding	41	GC03P054156	1.52
1981	DSPP	Dentin Sialophosphoprotein	Protein Coding	37	GC04P087608	1.52
1982	ZPR1	ZPR1 Zinc Finger	Protein Coding	36	GC11M116777	1.52
1983	LOC100507053	Uncharacterized LOC100507053	RNA Gene	8	GC04P099088	1.52
1984	STAT5B	Signal Transducer And Activator Of Transcription 5B	Protein Coding	50	GC17M042199	1.52
1985	TNFRSF10A	TNF Receptor Superfamily Member 10a	Protein Coding	47	GC08M023190	1.52
1986	ALPP	Alkaline Phosphatase, Placental	Protein Coding	46	GC02P232378	1.52
1987	EFEMP1	EGF Containing Fibulin Extracellular Matrix Protein 1	Protein Coding	45	GC02M055865	1.52
1988	AKR1B10	Aldo-Keto Reductase Family 1 Member B10	Protein Coding	45	GC07P134527	1.52
1989	PDGFD	Platelet Derived Growth Factor D	Protein Coding	45	GC11M103907	1.52
1990	RICTOR	RPTOR Independent Companion Of MTOR Complex 2	Protein Coding	44	GC05M038939	1.52
1991	HAS3	Hyaluronan Synthase 3	Protein Coding	42	GC16P069105	1.52
1992	ALDH9A1	Aldehyde Dehydrogenase 9 Family Member A1	Protein Coding	42	GC01M165665	1.52
1993	CSGALNACT1	Chondroitin Sulfate N-Acetylgalactosaminyltransferase 1	Protein Coding	40	GC08M019404	1.52
1994	HAS1	Hyaluronan Synthase 1	Protein Coding	40	GC19M051714	1.52
1995	ECE2	Endothelin Converting Enzyme 2	Protein Coding	39	GC03P184249	1.52
1996	CCL22	C-C Motif Chemokine Ligand 22	Protein Coding	39	GC16P057359	1.52
1997	MT-TL1	Mitochondrially Encoded TRNA-Leu (UUA/G) 1	RNA Gene	16	GCMTP003232	1.52
1998	LNCRNA-ATB	Long Noncoding RNA Activated By TGF-Beta	RNA Gene	4	GC14U902188	1.52
[truncated: 2,348 more rows]

## Sheet: Suppl Table 4
Table S4. Confidence score between active compounds and atherosclerosis-related target genes
#node1	node2	Confidence_score
ABCA1	Stigmasterol	0.713
ABCB1	Quercetin	0.724
ABCB1	Kaempferol	0.8
ABCB1	Catechin	0.839
ABCB11	Sitosterol	0.86
ABCC1	Taxifolin	0.947
ABCC1	Quercetin	0.7
ABCC1	Kaempferol	0.845
ABCC1	Baicalein	0.953
ABCG5	Stigmasterol	0.898
ABCG5	Sitosterol	0.898
ABCG8	Stigmasterol	0.722
ABCG8	Sitosterol	0.86
ABCG8	Campesterol	0.7
ACACA	Quercetin	0.951
ADIPOQ	Quercetin	0.733
AHR	Quercetin	0.727
AHR	Kaempferol	0.824
AIFM1	Quercetin	0.987
AKT1	Quercetin	0.8
AKT1	Kaempferol	0.8
AKT1	Cinnamaldehyde	0.938
AKT1	Betulinic acid	0.738
AKT1	Baicalein	0.8
ALOX12	Quercetin	0.84
ALOX12	Kaempferol	0.7
ALOX12	Baicalein	0.752
ALOX15	Baicalein	0.815
ALOX5	Baicalin	0.832
APOB	Taxifolin	0.839
APOB	Quercetin	0.842
APOB	Catechin	0.843
APOE	Sitosterol	0.908
AR	Quercetin	0.815
ARG2	Catechin	0.938
ARNT	Quercetin	0.725
ATM	Kaempferol	0.824
BACE1	Catechin	0.842
BAX	Quercetin	0.848
BCL2	Quercetin	0.7
BECN1	Baicalin	0.7
BID	Quercetin	0.8
BID	Cinnamaldehyde	0.8
BIRC5	Betulinic acid	0.7
CA1	Ellagic acid	0.964
CA12	Ellagic acid	0.728
CA2	Ellagic acid	0.8
CA3	Ellagic acid	0.953
CASP3	Sitosterol	0.86
CASP3	Peroxyergosterol	0.863
CASP3	Kaempferol	0.7
CASP3	Ellagic acid	0.841
CASP3	Cinnamaldehyde	0.7
CASP3	Betulinic acid	0.7
CASP7	Quercetin	0.794
CASP7	Betulinic acid	0.7
CASP8	Quercetin	0.7
CASP8	Paeonol	0.7
CASP8	Cinnamaldehyde	0.958
CASP8	Baicalin	0.823
CASP9	Quercetin	0.725
CASP9	Kaempferol	0.7
CAT	Quercetin	0.7
CCL2	Quercetin	0.7
CCL2	Kaempferol	0.83
CCL2	Ellagic acid	0.7
CCL3	Cinnamaldehyde	0.772
CCL5	Cinnamaldehyde	0.7
CCNB1	Baicalein	0.75
CCND1	Baicalein	0.725
CDK1	Kaempferol	0.729
CDK1	Baicalein	0.7
CDK2	Quercetin	0.82
CDK2	Kaempferol	0.945
CDK2	Baicalein	0.7
CDK4	Baicalein	0.7
CDKN1A	Quercetin	0.828
CDKN2A	Quercetin	0.786
CFTR	Quercetin	0.786
CFTR	Baicalein	0.7
CHEK2	Quercetin	0.786
CHUK	Quercetin	0.832
CHUK	Kaempferol	0.7
CKB	Quercetin	0.766
CSF2	Quercetin	0.766
CSF2	Kaempferol	0.7
CSF2	Catechin	0.843
CSNK2A1	Ellagic acid	0.7
CTNNB1	Quercetin	0.733
CXCL10	Quercetin	0.733
CXCR4	Quercetin	0.733
CYBB	Quercetin	0.85
CYCS	Betulinic acid	0.7
CYP19A1	Quercetin	0.828
CYP1A1	Quercetin	0.826
CYP1A1	Kaempferol	0.969
CYP1A1	Baicalein	0.879
CYP1A2	Quercetin	0.8
CYP1A2	Kaempferol	0.958
CYP1A2	Baicalein	0.711
CYP1B1	Quercetin	0.7
CYP1B1	Kaempferol	0.943
CYP1B1	Baicalein	0.92
CYP2B6	Kaempferol	0.8
CYP2C8	Quercetin	0.7
CYP2C9	Quercetin	0.703
CYP2E1	Baicalin	0.812
CYP3A4	Quercetin	0.8
CYP3A4	Kaempferol	0.7
CYP3A4	Baicalin	0.817
CYP3A4	Baicalein	0.879
CYP7A1	Sitosterol	0.703
DDIT4	Baicalein	0.811
DHCR24	Sitosterol	0.906
DHCR24	Campesterol	0.7
DIABLO	Quercetin	0.722
DIO2	Quercetin	0.7
DIO2	Kaempferol	0.879
DNMT1	Catechin	0.8
EDN1	Quercetin	0.938
EEF1A1	Quercetin	0.8
EGF	Baicalin	0.812
EGFR	Quercetin	0.7
EGFR	Betulinic acid	0.786
EIF2AK2	Quercetin	0.7
ERN1	Quercetin	0.7
ESR1	Quercetin	0.7
ESR1	Kaempferol	0.828
ESR2	Quercetin	0.742
ESR2	Kaempferol	0.818
F12	Ellagic acid	0.7
F3	Quercetin	0.8
FNDC5	Quercetin	0.7
FOS	Quercetin	0.723
FOXP3	Baicalin	0.812
G6PD	Ellagic acid	0.842
GADD45A	Quercetin	0.969
GLRX	Cinnamaldehyde	0.733
GSK3B	Quercetin	0.7
GSK3B	Baicalein	0.7
GSTP1	Quercetin	0.727
GSTP1	Kaempferol	0.7
HCK	Quercetin	0.938
HIF1A	Quercetin	0.8
HIF1A	Baicalin	0.812
HMOX1	Quercetin	0.814
HMOX1	Kaempferol	0.8
HMOX1	Catechin	0.725
HSD11B2	Baicalein	0.824
HSF1	Paeoniflorin	0.759
HSPA1A	Quercetin	0.7
HSPA4	Quercetin	0.865
ICAM1	Sitosterol	0.86
ICAM1	Quercetin	0.8
ICAM1	Paeonol	0.7
IGF1R	Kaempferol	0.7
IGF2	Kaempferol	0.895
IGFBP3	Quercetin	0.8
IL10	Stigmasterol	0.713
IL17A	Baicalin	0.812
IL1B	Quercetin	0.723
IL2	Kaempferol	0.847
IL4	Ellagic acid	0.7
IL6	Quercetin	0.8
IL6	Catechin	0.862
IL6	Baicalein	0.872
INS	Baicalein	0.711
ITGA2	Kaempferol	0.8
JUN	Quercetin	0.817
JUN	Kaempferol	0.8
KCNMA1	Quercetin	0.755
KEAP1	Baicalein	0.8
LEPR	Quercetin	0.833
LMNB1	Betulinic acid	0.784
MAOA	Quercetin	0.824
MAP2K1	Baicalein	0.729
MAPK1	Quercetin	0.817
MAPK1	Kaempferol	0.815
MAPK1	Cinnamaldehyde	0.941
MAPK1	Betulinic acid	0.736
MAPK1	Baicalein	0.745
MAPK14	Quercetin	0.8
MAPK14	Cinnamaldehyde	0.963
MAPK3	Quercetin	0.7
MAPK3	Kaempferol	0.8
MAPK3	Cinnamaldehyde	0.847
MAPK3	Betulinic acid	0.7
MAPK3	Baicalein	0.957
MAPK8	Quercetin	0.785
MAPK8	Cinnamaldehyde	0.734
MAPK8	Baicalein	0.955
MCL1	Quercetin	0.748
MCL1	Baicalein	0.856
MMP1	Quercetin	0.712
MMP1	Kaempferol	0.824
MMP2	Quercetin	0.795
MMP2	Kaempferol	0.7
MMP2	Ellagic acid	0.8
MMP2	Baicalein	0.7
MMP3	Quercetin	0.836
MMP9	Quercetin	0.8
MMP9	Baicalein	0.981
MSMO1	Sitosterol α1	0.86
MTTP	Taxifolin	0.815
MYC	Baicalin	0.812
NFE2L2	Quercetin	0.7
NFE2L2	Baicalein	0.879
NFKB1	Baicalein	0.724
NFKBIA	Quercetin	0.7
NFKBIA	Kaempferol	0.8
NFKBIB	Baicalein	0.935
NME2	Ellagic acid	0.826
NOS1	Quercetin	0.7
NOS1	Kaempferol	0.738
NOS1	Catechin	0.725
NOS1	Baicalein	0.818
NOS2	Quercetin	0.7
NOS2	Kaempferol	0.8
NOS2	Cinnamaldehyde	0.954
NOS2	Catechin	0.8
NOS2	Baicalin	0.812
NOS2	Baicalein	0.892
NOS3	Quercetin	0.8
NOS3	Ellagic acid	0.7
NOS3	Catechin	0.8
NOS3	Betulinic acid	0.933
NOTCH1	Baicalin	0.812
NOTCH1	Baicalein	0.845
NPC1L1	Quercetin	0.7
NPY1R	Quercetin	0.88
NQO1	Taxifolin	0.732
NQO1	Cinnamaldehyde	0.938
NR1I2	Quercetin	0.7
NR1I2	Kaempferol	0.834
NR1I2	Baicalein	0.938
NR1I3	Quercetin	0.8
NR1I3	Kaempferol	0.951
NR1I3	Ellagic acid	0.7
NT5E	Baicalin	0.712
PARG	Ellagic acid	0.7
PARP1	Quercetin	0.7
PDGFB	Baicalin	0.712
PDX1	Quercetin	0.8
PIK3CA	Quercetin	0.953
PIK3CG	Quercetin	0.8
PIM1	Quercetin	0.7
PKM	Baicalin	0.953
PKM	Baicalein	0.822
PLAT	Quercetin	0.965
PLAU	Quercetin	0.877
PLAU	Baicalein	0.727
PNLIP	Betulinic acid	0.722
PON1	Quercetin	0.8
PON1	Catechin	0.7
POR	Quercetin	0.8
PPARA	Quercetin	0.814
PRKCA	Ellagic acid	0.743
PRKCA	Baicalein	0.872
PRKCB	Ellagic acid	0.736
PTGES	Kaempferol	0.837
PTGS1	Quercetin	0.824
PTGS1	Baicalein	0.943
PTGS2	Quercetin	0.7
PTGS2	Paeonol	0.7
PTGS2	Cinnamaldehyde	0.84
PTGS2	Catechin	0.7
PTGS2	Baicalein	0.8
PTHLH	Betulinic acid	0.895
PTK2	Quercetin	0.8
PYGB	Quercetin	0.7
PYGM	Quercetin	0.827
RAF1	Quercetin	0.951
RB1	Quercetin	0.8
RB1	Kaempferol	0.823
RB1	Baicalein	0.7
RELA	Cinnamaldehyde	0.975
RELA	Baicalein	0.7
REN	Baicalin	0.829
RETN	Ellagic acid	0.726
RPS6KA5	Quercetin	0.926
SERPIND1	Quercetin	0.8
SERPINE1	Baicalein	0.961
SIRT1	Quercetin	0.727
SLC22A11	Catechin	0.7
SLC2A1	Kaempferol	0.778
SLC2A2	Quercetin	0.814
SLC2A4	Quercetin	0.958
SLC2A4	Pachymic acid	0.8
SLC2A4	Cinnamaldehyde	0.885
SLCO1B1	Stigmasterol	0.906
SP1	Quercetin	0.734
SP1	Betulinic acid	0.952
SQLE	Ellagic acid	0.725
SRC	Quercetin	0.723
SRC	Kaempferol	0.7
SREBF1	Sitosterol	0.886
SREBF2	Sitosterol	0.86
STAT1	Quercetin	0.816
STAT1	Kaempferol	0.7
STAT3	Kaempferol	0.7
SULT1E1	Quercetin	0.8
SYK	Ellagic acid	0.966
TBK1	Quercetin	0.8
TFAM	Quercetin	0.816
TGFA	Quercetin	0.845
TGM2	Quercetin	0.816
TLR2	Baicalin	0.818
TLR4	Quercetin	0.8
TLR4	Paeoniflorin	0.938
TLR4	Baicalin	0.743
TLR6	Quercetin	0.814
TNF	Stigmasterol	0.8
TNF	Quercetin	0.786
TNFRSF10B	Quercetin	0.763
TNFRSF10B	Baicalein	0.957
TNFRSF11B	Kaempferol	0.8
TNFSF10	Quercetin	0.7
TNFSF11	Taxifolin	0.907
TP53	Quercetin	0.84
TP53	Kaempferol	0.948
TP53	Baicalein	0.812
TRPA1	Cinnamaldehyde	0.758
TRPM7	Quercetin	0.8
TYR	Trametenolic acid	0.8
TYR	Paeonol	0.725
TYR	Ellagic acid	0.8
UGT1A1	Quercetin	0.8
UGT1A1	Kaempferol	0.822
UGT1A10	Quercetin	0.742
UGT1A10	Kaempferol	0.786
UGT1A3	Quercetin	0.8
UGT1A3	Kaempferol	0.8
UGT1A5	Quercetin	0.721
UGT1A7	Quercetin	0.7
UGT1A7	Kaempferol	0.8
UGT1A8	Quercetin	0.952
UGT1A8	Kaempferol	0.8
UGT1A9	Quercetin	0.844
UGT1A9	Kaempferol	0.853
VCAM1	Paeonol	0.723
VEGFA	Quercetin	0.839
VEGFA	Baicalin	0.739
VEGFA	Baicalein	0.849
XBP1	Quercetin	0.8
XDH	Quercetin	0.908

## Sheet: Suppl Table 5
Table S5. Topological analysis between active compounds and atherosclerosis-related target genes network
Gene name	AverageShortestPathLength	BetweennessCentrality	ClosenessCentrality	Degree	Eccentricity	EdgeCount	Indegree	Outdegree	NeighborhoodConnectivity	NumberOfUndirectedEdges	Radiality	Stress	TopologicalCoefficient
Quercetin	1.81739	0.713168	0.550239	131	4	131	131	0	1.8626	131	0.99376	368200	0.0663535
Kaempferol	2.58261	0.149665	0.387205	51	5	51	51	0	2.54902	51	0.987919	164020	0.154902
Baicalein	2.71304	0.15463	0.36859	45	6	45	45	0	2.51111	45	0.986923	176574	0.167901
Ellagic acid	2.94783	0.131281	0.339233	21	5	21	21	0	1.85714	21	0.985131	50610	0.0857143
Baicalin	3.13043	0.0974527	0.319444	19	6	19	19	0	1.94737	19	0.983737	60226	0.135338
Cinnamaldehyde	2.85217	0.0566841	0.35061	17	5	17	17	0	3.17647	17	0.985861	36826	0.181373
Catechin	2.98261	0.0384092	0.335277	14	6	14	14	0	2.85714	14	0.984866	20116	0.206349
Betulinic acid	3.04348	0.0475844	0.328571	13	5	13	13	0	2.76923	13	0.984401	29822	0.221154
beta-Sitosterol	3.18261	0.071462	0.314208	10	5	10	10	0	2.1	10	0.983339	29158	0.122222
CASP3	3.05652	0.0564153	0.327169	6	6	6	0	6	18.8333	6	0.984301	34388	0.185764
NOS2	2.34348	0.0392237	0.426716	6	5	6	0	6	46.1667	6	0.989744	32130	0.253745
Stigmasterol	3.61739	0.0332143	0.276442	6	6	6	6	0	1.66667	6	0.98002	13590	0.222222
PTGS2	2.5087	0.01891	0.398614	5	5	5	0	5	42.4	5	0.988483	15534	0.260377
Taxifolin	3.38261	0.0185	0.29563	5	6	5	5	0	2.2	5	0.981812	5560	0.24
MAPK3	2.43913	0.0173175	0.409982	5	5	5	0	5	51.4	5	0.989014	19492	0.3
MAPK1	2.43913	0.0173175	0.409982	5	5	5	0	5	51.4	5	0.989014	19492	0.3
AKT1	2.43913	0.0173175	0.409982	5	5	5	0	5	51.4	5	0.989014	19492	0.3
Paeonol	3.13913	0.0166335	0.31856	5	5	5	5	0	3.2	5	0.983671	8714	0.275
MMP2	2.39565	0.0349459	0.417423	4	5	4	0	4	62	4	0.989346	23070	0.352601
NOS3	2.54348	0.0321497	0.393162	4	5	4	0	4	44.75	4	0.988218	14038	0.280449
CASP8	2.57826	0.0236206	0.387858	4	5	4	0	4	43	4	0.987952	14998	0.276316
CYP3A4	2.43913	0.0232547	0.409982	4	5	4	0	4	61.5	4	0.989014	21956	0.357988
ABCC1	2.5087	0.0199835	0.398614	4	5	4	0	4	58	4	0.988483	13662	0.354037
NOS1	2.5	0.00879834	0.4	4	5	4	0	4	60.25	4	0.98855	11888	0.365741
ICAM1	2.67391	0.0484627	0.373984	3	4	3	0	3	48.6667	3	0.987222	19620	0.338061
TLR4	2.67391	0.0273489	0.373984	3	5	3	0	3	50.6667	3	0.987222	12936	0.344907
NR1I3	2.53478	0.0236566	0.394511	3	5	3	0	3	67.6667	3	0.988284	12924	0.421941
CCL2	2.53478	0.0236566	0.394511	3	5	3	0	3	67.6667	3	0.988284	12924	0.421941
VEGFA	2.55217	0.0152341	0.391823	3	5	3	0	3	65	3	0.988151	13252	0.405063
APOB	2.73478	0.0115887	0.36566	3	5	3	0	3	50	3	0.986757	4104	0.357664
SLC2A4	2.72609	0.0112336	0.366826	3	5	3	0	3	49.6667	3	0.986824	5400	0.355231
TYR	3.78696	0.0104295	0.264064	3	6	3	0	3	9	3	0.978726	3780	0.333333
ABCG8	4.12609	0.00684519	0.24236	3	6	3	0	3	6	3	0.976137	4660	0.384615
MAPK8	2.58696	0.00584374	0.386555	3	5	3	0	3	64.3333	3	0.987886	7476	0.413943
IL6	2.61304	0.0056807	0.382696	3	5	3	0	3	63.3333	3	0.987687	6392	0.412804
TP53	2.54348	0.00444713	0.393162	3	5	3	0	3	75.6667	3	0.988218	9068	0.472574
RB1	2.54348	0.00444713	0.393162	3	5	3	0	3	75.6667	3	0.988218	9068	0.472574
NR1I2	2.54348	0.00444713	0.393162	3	5	3	0	3	75.6667	3	0.988218	9068	0.472574
CYP1B1	2.54348	0.00444713	0.393162	3	5	3	0	3	75.6667	3	0.988218	9068	0.472574
CYP1A2	2.54348	0.00444713	0.393162	3	5	3	0	3	75.6667	3	0.988218	9068	0.472574
CYP1A1	2.54348	0.00444713	0.393162	3	5	3	0	3	75.6667	3	0.988218	9068	0.472574
CDK2	2.54348	0.00444713	0.393162	3	5	3	0	3	75.6667	3	0.988218	9068	0.472574
ALOX12	2.54348	0.00444713	0.393162	3	5	3	0	3	75.6667	3	0.988218	9068	0.472574
HMOX1	2.64783	0.00438181	0.377668	3	5	3	0	3	65.3333	3	0.987421	5036	0.440639
CSF2	2.64783	0.00438181	0.377668	3	5	3	0	3	65.3333	3	0.987421	5036	0.440639
ABCB1	2.64783	0.00438181	0.377668	3	5	3	0	3	65.3333	3	0.987421	5036	0.440639
TNF	2.75217	0.0378712	0.363349	2	5	2	0	2	68.5	2	0.986625	15710	0.5
HIF1A	2.6913	0.0100335	0.371567	2	5	2	0	2	75	2	0.987089	6552	0.517483
Paeoniflorin	3.66087	0.00869565	0.273159	2	6	2	2	0	2	2	0.979688	3194	0.5
PRKCA	3.43043	0.00801678	0.291508	2	6	2	0	2	33	2	0.981447	3922	0.507937
SP1	2.74348	0.00397189	0.364501	2	5	2	0	2	72	2	0.986691	2928	0.522059
EGFR	2.74348	0.00397189	0.364501	2	5	2	0	2	72	2	0.986691	2928	0.522059
CASP7	2.74348	0.00397189	0.364501	2	5	2	0	2	72	2	0.986691	2928	0.522059
DHCR24	4.16957	0.0033904	0.239833	2	6	2	0	2	6	2	0.975805	2778	0.555556
PKM	3.56087	0.00286785	0.28083	2	7	2	0	2	32	2	0.980451	2366	0.534483
NOTCH1	3.56087	0.00286785	0.28083	2	7	2	0	2	32	2	0.980451	2366	0.534483
MAPK14	2.73478	0.00253799	0.36566	2	5	2	0	2	74	2	0.986757	2080	0.532847
BID	2.73478	0.00253799	0.36566	2	5	2	0	2	74	2	0.986757	2080	0.532847
TNFRSF10B	2.65652	0.00233271	0.376432	2	5	2	0	2	88	2	0.987355	4334	0.591837
PTGS1	2.65652	0.00233271	0.376432	2	5	2	0	2	88	2	0.987355	4334	0.591837
PLAU	2.65652	0.00233271	0.376432	2	5	2	0	2	88	2	0.987355	4334	0.591837
NFE2L2	2.65652	0.00233271	0.376432	2	5	2	0	2	88	2	0.987355	4334	0.591837
MMP9	2.65652	0.00233271	0.376432	2	5	2	0	2	88	2	0.987355	4334	0.591837
MCL1	2.65652	0.00233271	0.376432	2	5	2	0	2	88	2	0.987355	4334	0.591837
GSK3B	2.65652	0.00233271	0.376432	2	5	2	0	2	88	2	0.987355	4334	0.591837
CFTR	2.65652	0.00233271	0.376432	2	5	2	0	2	88	2	0.987355	4334	0.591837
PON1	2.76957	0.00220398	0.361068	2	5	2	0	2	72.5	2	0.986492	1430	0.533582
NQO1	3.80435	0.00176185	0.262857	2	6	2	0	2	11	2	0.978593	644	0.5
ABCG5	4.13478	0.00151778	0.241851	2	6	2	0	2	8	2	0.97607	474	0.538462
UGT1A9	2.6913	0.00117461	0.371567	2	5	2	0	2	91	2	0.987089	2844	0.633803
UGT1A8	2.6913	0.00117461	0.371567	2	5	2	0	2	91	2	0.987089	2844	0.633803
UGT1A7	2.6913	0.00117461	0.371567	2	5	2	0	2	91	2	0.987089	2844	0.633803
UGT1A3	2.6913	0.00117461	0.371567	2	5	2	0	2	91	2	0.987089	2844	0.633803
UGT1A10	2.6913	0.00117461	0.371567	2	5	2	0	2	91	2	0.987089	2844	0.633803
UGT1A1	2.6913	0.00117461	0.371567	2	5	2	0	2	91	2	0.987089	2844	0.633803
STAT1	2.6913	0.00117461	0.371567	2	5	2	0	2	91	2	0.987089	2844	0.633803
SRC	2.6913	0.00117461	0.371567	2	5	2	0	2	91	2	0.987089	2844	0.633803
NFKBIA	2.6913	0.00117461	0.371567	2	5	2	0	2	91	2	0.987089	2844	0.633803
MMP1	2.6913	0.00117461	0.371567	2	5	2	0	2	91	2	0.987089	2844	0.633803
JUN	2.6913	0.00117461	0.371567	2	5	2	0	2	91	2	0.987089	2844	0.633803
GSTP1	2.6913	0.00117461	0.371567	2	5	2	0	2	91	2	0.987089	2844	0.633803
ESR2	2.6913	0.00117461	0.371567	2	5	2	0	2	91	2	0.987089	2844	0.633803
ESR1	2.6913	0.00117461	0.371567	2	5	2	0	2	91	2	0.987089	2844	0.633803
DIO2	2.6913	0.00117461	0.371567	2	5	2	0	2	91	2	0.987089	2844	0.633803
CHUK	2.6913	0.00117461	0.371567	2	5	2	0	2	91	2	0.987089	2844	0.633803
CASP9	2.6913	0.00117461	0.371567	2	5	2	0	2	91	2	0.987089	2844	0.633803
AHR	2.6913	0.00117461	0.371567	2	5	2	0	2	91	2	0.987089	2844	0.633803
RELA	3.5087	0.000973	0.285006	2	6	2	0	2	31	2	0.98085	1062	0.555556
CDK1	3.3087	0.00094	0.302234	2	6	2	0	2	48	2	0.982376	1890	0.602564
Campesterol	5.11304	7.91e-05	0.195578	2	7	2	2	0	2.5	2	0.968603	12	0.75
beta-Sitosterol alpha1	1	0	1	1	1	1	1	0	1	1	1	0	0
MSMO1	1	0	1	1	1	1	0	1	1	1	1	0	0
XDH	2.81304	0	0.355487	1	5	1	0	1	131	1	0.98616	0	0
XBP1	2.81304	0	0.355487	1	5	1	0	1	131	1	0.98616	0	0
UGT1A5	2.81304	0	0.355487	1	5	1	0	1	131	1	0.98616	0	0
TRPM7	2.81304	0	0.355487	1	5	1	0	1	131	1	0.98616	0	0
TNFSF10	2.81304	0	0.355487	1	5	1	0	1	131	1	0.98616	0	0
TLR6	2.81304	0	0.355487	1	5	1	0	1	131	1	0.98616	0	0
TGM2	2.81304	0	0.355487	1	5	1	0	1	131	1	0.98616	0	0
TGFA	2.81304	0	0.355487	1	5	1	0	1	131	1	0.98616	0	0
TFAM	2.81304	0	0.355487	1	5	1	0	1	131	1	0.98616	0	0
TBK1	2.81304	0	0.355487	1	5	1	0	1	131	1	0.98616	0	0
SULT1E1	2.81304	0	0.355487	1	5	1	0	1	131	1	0.98616	0	0
SLC2A2	2.81304	0	0.355487	1	5	1	0	1	131	1	0.98616	0	0
SIRT1	2.81304	0	0.355487	1	5	1	0	1	131	1	0.98616	0	0
SERPIND1	2.81304	0	0.355487	1	5	1	0	1	131	1	0.98616	0	0
RPS6KA5	2.81304	0	0.355487	1	5	1	0	1	131	1	0.98616	0	0
RAF1	2.81304	0	0.355487	1	5	1	0	1	131	1	0.98616	0	0
PYGM	2.81304	0	0.355487	1	5	1	0	1	131	1	0.98616	0	0
PYGB	2.81304	0	0.355487	1	5	1	0	1	131	1	0.98616	0	0
PTK2	2.81304	0	0.355487	1	5	1	0	1	131	1	0.98616	0	0
PPARA	2.81304	0	0.355487	1	5	1	0	1	131	1	0.98616	0	0
POR	2.81304	0	0.355487	1	5	1	0	1	131	1	0.98616	0	0
PLAT	2.81304	0	0.355487	1	5	1	0	1	131	1	0.98616	0	0
PIM1	2.81304	0	0.355487	1	5	1	0	1	131	1	0.98616	0	0
PIK3CG	2.81304	0	0.355487	1	5	1	0	1	131	1	0.98616	0	0
PIK3CA	2.81304	0	0.355487	1	5	1	0	1	131	1	0.98616	0	0
PDX1	2.81304	0	0.355487	1	5	1	0	1	131	1	0.98616	0	0
PARP1	2.81304	0	0.355487	1	5	1	0	1	131	1	0.98616	0	0
NPY1R	2.81304	0	0.355487	1	5	1	0	1	131	1	0.98616	0	0
NPC1L1	2.81304	0	0.355487	1	5	1	0	1	131	1	0.98616	0	0
MMP3	2.81304	0	0.355487	1	5	1	0	1	131	1	0.98616	0	0
MAOA	2.81304	0	0.355487	1	5	1	0	1	131	1	0.98616	0	0
LEPR	2.81304	0	0.355487	1	5	1	0	1	131	1	0.98616	0	0
KCNMA1	2.81304	0	0.355487	1	5	1	0	1	131	1	0.98616	0	0
IL1B	2.81304	0	0.355487	1	5	1	0	1	131	1	0.98616	0	0
IGFBP3	2.81304	0	0.355487	1	5	1	0	1	131	1	0.98616	0	0
HSPA4	2.81304	0	0.355487	1	5	1	0	1	131	1	0.98616	0	0
HSPA1A	2.81304	0	0.355487	1	5	1	0	1	131	1	0.98616	0	0
HCK	2.81304	0	0.355487	1	5	1	0	1	131	1	0.98616	0	0
GADD45A	2.81304	0	0.355487	1	5	1	0	1	131	1	0.98616	0	0
FOS	2.81304	0	0.355487	1	5	1	0	1	131	1	0.98616	0	0
FNDC5	2.81304	0	0.355487	1	5	1	0	1	131	1	0.98616	0	0
F3	2.81304	0	0.355487	1	5	1	0	1	131	1	0.98616	0	0
ERN1	2.81304	0	0.355487	1	5	1	0	1	131	1	0.98616	0	0
EIF2AK2	2.81304	0	0.355487	1	5	1	0	1	131	1	0.98616	0	0
EEF1A1	2.81304	0	0.355487	1	5	1	0	1	131	1	0.98616	0	0
EDN1	2.81304	0	0.355487	1	5	1	0	1	131	1	0.98616	0	0
DIABLO	2.81304	0	0.355487	1	5	1	0	1	131	1	0.98616	0	0
CYP2C9	2.81304	0	0.355487	1	5	1	0	1	131	1	0.98616	0	0
CYP2C8	2.81304	0	0.355487	1	5	1	0	1	131	1	0.98616	0	0
CYP19A1	2.81304	0	0.355487	1	5	1	0	1	131	1	0.98616	0	0
CYBB	2.81304	0	0.355487	1	5	1	0	1	131	1	0.98616	0	0
CXCR4	2.81304	0	0.355487	1	5	1	0	1	131	1	0.98616	0	0
CXCL10	2.81304	0	0.355487	1	5	1	0	1	131	1	0.98616	0	0
CTNNB1	2.81304	0	0.355487	1	5	1	0	1	131	1	0.98616	0	0
CKB	2.81304	0	0.355487	1	5	1	0	1	131	1	0.98616	0	0
CHEK2	2.81304	0	0.355487	1	5	1	0	1	131	1	0.98616	0	0
CDKN2A	2.81304	0	0.355487	1	5	1	0	1	131	1	0.98616	0	0
CDKN1A	2.81304	0	0.355487	1	5	1	0	1	131	1	0.98616	0	0
CAT	2.81304	0	0.355487	1	5	1	0	1	131	1	0.98616	0	0
BCL2	2.81304	0	0.355487	1	5	1	0	1	131	1	0.98616	0	0
BAX	2.81304	0	0.355487	1	5	1	0	1	131	1	0.98616	0	0
ARNT	2.81304	0	0.355487	1	5	1	0	1	131	1	0.98616	0	0
AR	2.81304	0	0.355487	1	5	1	0	1	131	1	0.98616	0	0
AIFM1	2.81304	0	0.355487	1	5	1	0	1	131	1	0.98616	0	0
ADIPOQ	2.81304	0	0.355487	1	5	1	0	1	131	1	0.98616	0	0
ACACA	2.81304	0	0.355487	1	5	1	0	1	131	1	0.98616	0	0
TNFRSF11B	3.57826	0	0.279465	1	6	1	0	1	51	1	0.980319	0	0
STAT3	3.57826	0	0.279465	1	6	1	0	1	51	1	0.980319	0	0
SLC2A1	3.57826	0	0.279465	1	6	1	0	1	51	1	0.980319	0	0
PTGES	3.57826	0	0.279465	1	6	1	0	1	51	1	0.980319	0	0
ITGA2	3.57826	0	0.279465	1	6	1	0	1	51	1	0.980319	0	0
IL2	3.57826	0	0.279465	1	6	1	0	1	51	1	0.980319	0	0
IGF2	3.57826	0	0.279465	1	6	1	0	1	51	1	0.980319	0	0
IGF1R	3.57826	0	0.279465	1	6	1	0	1	51	1	0.980319	0	0
CYP2B6	3.57826	0	0.279465	1	6	1	0	1	51	1	0.980319	0	0
ATM	3.57826	0	0.279465	1	6	1	0	1	51	1	0.980319	0	0
SERPINE1	3.7087	0	0.269637	1	7	1	0	1	45	1	0.979323	0	0
NFKBIB	3.7087	0	0.269637	1	7	1	0	1	45	1	0.979323	0	0
NFKB1	3.7087	0	0.269637	1	7	1	0	1	45	1	0.979323	0	0
MAP2K1	3.7087	0	0.269637	1	7	1	0	1	45	1	0.979323	0	0
KEAP1	3.7087	0	0.269637	1	7	1	0	1	45	1	0.979323	0	0
INS	3.7087	0	0.269637	1	7	1	0	1	45	1	0.979323	0	0
HSD11B2	3.7087	0	0.269637	1	7	1	0	1	45	1	0.979323	0	0
DDIT4	3.7087	0	0.269637	1	7	1	0	1	45	1	0.979323	0	0
CDK4	3.7087	0	0.269637	1	7	1	0	1	45	1	0.979323	0	0
CCND1	3.7087	0	0.269637	1	7	1	0	1	45	1	0.979323	0	0
CCNB1	3.7087	0	0.269637	1	7	1	0	1	45	1	0.979323	0	0
ALOX15	3.7087	0	0.269637	1	7	1	0	1	45	1	0.979323	0	0
Pachymic acid	3.72174	0	0.268692	1	6	1	1	0	3	1	0.979223	0	0
TRPA1	3.84783	0	0.259887	1	6	1	0	1	17	1	0.978261	0	0
GLRX	3.84783	0	0.259887	1	6	1	0	1	17	1	0.978261	0	0
CCL5	3.84783	0	0.259887	1	6	1	0	1	17	1	0.978261	0	0
CCL3	3.84783	0	0.259887	1	6	1	0	1	17	1	0.978261	0	0
SYK	3.94348	0	0.253583	1	6	1	0	1	21	1	0.977531	0	0
SQLE	3.94348	0	0.253583	1	6	1	0	1	21	1	0.977531	0	0
RETN	3.94348	0	0.253583	1	6	1	0	1	21	1	0.977531	0	0
PRKCB	3.94348	0	0.253583	1	6	1	0	1	21	1	0.977531	0	0
PARG	3.94348	0	0.253583	1	6	1	0	1	21	1	0.977531	0	0
NME2	3.94348	0	0.253583	1	6	1	0	1	21	1	0.977531	0	0
IL4	3.94348	0	0.253583	1	6	1	0	1	21	1	0.977531	0	0
G6PD	3.94348	0	0.253583	1	6	1	0	1	21	1	0.977531	0	0
F12	3.94348	0	0.253583	1	6	1	0	1	21	1	0.977531	0	0
CSNK2A1	3.94348	0	0.253583	1	6	1	0	1	21	1	0.977531	0	0
CA3	3.94348	0	0.253583	1	6	1	0	1	21	1	0.977531	0	0
CA2	3.94348	0	0.253583	1	6	1	0	1	21	1	0.977531	0	0
CA12	3.94348	0	0.253583	1	6	1	0	1	21	1	0.977531	0	0
CA1	3.94348	0	0.253583	1	6	1	0	1	21	1	0.977531	0	0
SLC22A11	3.97826	0	0.251366	1	7	1	0	1	14	1	0.977265	0	0
DNMT1	3.97826	0	0.251366	1	7	1	0	1	14	1	0.977265	0	0
BACE1	3.97826	0	0.251366	1	7	1	0	1	14	1	0.977265	0	0
ARG2	3.97826	0	0.251366	1	7	1	0	1	14	1	0.977265	0	0
PTHLH	4.03913	0	0.247578	1	6	1	0	1	13	1	0.976801	0	0
PNLIP	4.03913	0	0.247578	1	6	1	0	1	13	1	0.976801	0	0
LMNB1	4.03913	0	0.247578	1	6	1	0	1	13	1	0.976801	0	0
CYCS	4.03913	0	0.247578	1	6	1	0	1	13	1	0.976801	0	0
BIRC5	4.03913	0	0.247578	1	6	1	0	1	13	1	0.976801	0	0
Peroxyergosterol	4.05217	0	0.246781	1	7	1	1	0	6	1	0.976701	0	0
TLR2	4.12609	0	0.24236	1	7	1	0	1	19	1	0.976137	0	0
REN	4.12609	0	0.24236	1	7	1	0	1	19	1	0.976137	0	0
PDGFB	4.12609	0	0.24236	1	7	1	0	1	19	1	0.976137	0	0
NT5E	4.12609	0	0.24236	1	7	1	0	1	19	1	0.976137	0	0
MYC	4.12609	0	0.24236	1	7	1	0	1	19	1	0.976137	0	0
IL17A	4.12609	0	0.24236	1	7	1	0	1	19	1	0.976137	0	0
FOXP3	4.12609	0	0.24236	1	7	1	0	1	19	1	0.976137	0	0
EGF	4.12609	0	0.24236	1	7	1	0	1	19	1	0.976137	0	0
CYP2E1	4.12609	0	0.24236	1	7	1	0	1	19	1	0.976137	0	0
BECN1	4.12609	0	0.24236	1	7	1	0	1	19	1	0.976137	0	0
ALOX5	4.12609	0	0.24236	1	7	1	0	1	19	1	0.976137	0	0
VCAM1	4.13478	0	0.241851	1	6	1	0	1	5	1	0.97607	0	0
SREBF2	4.17826	0	0.239334	1	6	1	0	1	10	1	0.975738	0	0
SREBF1	4.17826	0	0.239334	1	6	1	0	1	10	1	0.975738	0	0
CYP7A1	4.17826	0	0.239334	1	6	1	0	1	10	1	0.975738	0	0
APOE	4.17826	0	0.239334	1	6	1	0	1	10	1	0.975738	0	0
ABCB11	4.17826	0	0.239334	1	6	1	0	1	10	1	0.975738	0	0
TNFSF11	4.37826	0	0.228401	1	7	1	0	1	5	1	0.974212	0	0
MTTP	4.37826	0	0.228401	1	7	1	0	1	5	1	0.974212	0	0
SLCO1B1	4.61304	0	0.216777	1	7	1	0	1	6	1	0.97242	0	0
IL10	4.61304	0	0.216777	1	7	1	0	1	6	1	0.97242	0	0
ABCA1	4.61304	0	0.216777	1	7	1	0	1	6	1	0.97242	0	0
HSF1	4.65652	0	0.214753	1	7	1	0	1	2	1	0.972088	0	0
Trametenolic acid	4.78261	0	0.209091	1	7	1	1	0	3	1	0.971125	0	0
